# Supplementary material
Source: PubMed Central journal article supplement (PMC5736425)
Supplement: NIHMS911605-supplement-SUPPLEMENTAL_MATERIAL.pdf [file NIHMS911605-supplement-SUPPLEMENTAL_MATERIAL.pdf]

# SUPPLEMENTAL MATERIAL

## Supplemental Methods

### UHPLC-MS Metabolomics

Control and HPAH BOECs were seeded in 6-well plates and grown to confluence in complete EGM-2MV. Cells were then washed with EBM2 containing 0.1% FBS (EBM2/0.1%) and then incubated in EBM2/0.1% to ensure that the cells were free of growth factors. The media were aspirated and 1.5 ml/well fresh EBM2/0.1% added for 24 hours. The media were removed and centrifuged at 14,000 x g for 10 minutes at 4 °C to remove any cell debris, then separated from the pellets, aliquoted and frozen immediately at -80 °C until they were shipped on dry ice to Metabolon Inc. (Morrisville, North Carolina, USA). The cells remaining in the wells were trypsinised and counted using a haemocytometer for normalization of analytes to cell number. Metabolomics analyses were performed on the conditioned media by Metabolon Inc., as previously described<sup>1</sup>. Briefly, the sample preparation process was carried out using the automated MicroLab STAR® system (Hamilton Company, Reno, North Virginia, USA). Recovery standards were added prior to the first step in the extraction process for quality control purposes. Sample preparation was conducted using a proprietary series of organic and aqueous extractions to remove the protein fraction while allowing maximum recovery of small molecules. The resulting extract was divided into two fractions; one for analysis by LC and one for analysis by GC. Samples were placed briefly on a TurboVap® (Zymark/Biotage, Uppsala, Sweden) to remove the organic solvent. Each sample was then frozen and dried under vacuum. Compounds were identified by comparison to library entries of purified standards or recurrent unknown entities. Identification of known chemical entities was based on comparison to metabolomic library entries of ~4000 in-house purified standards. Multivariate data analysis was performed on original

scale data through the freely available software Metaboanalyst 3.0<sup>2</sup>. Data were processed for normalization to the median of values measured in the control group for each compound and auto-scaled. Statistical analysis (*t*-test) and multivariate analysis, including partial least square-discriminant analysis (PLS-DA) and hierarchical clustering analyses were performed as reported<sup>2</sup>.

### **Human lung tissue**

Tissues were obtained from the Papworth NHS Foundation Trust Hospital Tissue Bank (Papworth Everard, UK). Papworth Hospital ethical review committee approved the use of human tissues (Ethics Ref. 08/H0304/56+5) and informed consent was obtained from all subjects. Paraffin wax–embedded lung samples were isolated from patients with HPAH (n=4) and from control lung (n =4). *BMP2* mutations were detected as previously described<sup>3</sup>. Control samples comprised tissue from pneumonectomy specimens resected for malignancy, but distant from the site of tumor.

### **Rat lung tissue**

Tissue was obtained from the Sugen 5416-hypoxia rat model. Briefly, Male Sprague Dawley rats (12 weeks old, ~190-200g (Charles River, Saffron Walden, Essex, UK) were administered a single subcutaneous injection of Sugen 5416 (SU-5416; 20 mg/kg, Tocris, Bristol, UK) in vehicle (0.5% carboxyl methylcellulose sodium, 0.4% polysorbate 80, 0.9% benzyl alcohol, all Sigma-Aldrich, Poole, Dorset, UK). Subsequently, rats were placed into a 10% O<sub>2</sub> chamber for 3 weeks. After 3 weeks of hypoxia, animals were returned to a normoxic environment for 5 weeks. For terminal haemodynamic measurements rats were anaesthetized with xylazine (4.6

mg/kg) and ketamine (7 mg/kg). Body weight was recorded. Right ventricular function was assessed using a Millar SPR-869 pressure-volume catheter. Rats were then sacrificed and the hearts and lungs harvested. Right ventricular hypertrophy (RVH) was assessed by removing the heart and dissecting the right ventricle (RV) free wall from the left ventricle plus septum (LV+S), and weighing separately. The degree of right ventricular hypertrophy was determined for the ratio of the RV/LV+S (Futon Index). The right lung was then snap-frozen in liquid nitrogen. Animal studies were conducted in accordance with the UK Animals (Scientific Procedures) Act 1986 and approved under Home Office Project License 80/2460.

### **RNA extraction from cells and frozen lungs, and reverse transcription**

Total RNA from tissues and cells was obtained using the miRNeasy kit (Qiagen, Hilden, Germany) following the manufacturer's instructions. Samples were treated with DNase 1 (amplification grade; Sigma, St. Louis, MO, USA) to eliminate genomic DNA contamination and quantified using a NanoDrop ND-1000 Spectrophotometer (NanoDrop Technologies, Wilmington, DE, USA). cDNA for miRNA analysis was synthesized from total RNA using stem-loop reverse transcription primers according to the TaqMan miRNA Assay protocol (Applied Biosystems, Foster City, CA, USA). Each reaction contained 50 ng of extracted total RNA, 50 nM stem-looped RT primer, 1X RT buffer, 0.25 mM each of dNTPs, 3.33 U/mL Multiscribe reverse transcriptase and 0.25 U/mL RNase inhibitor. The 15  $\mu$ L reactions were incubated in a 96-well plate for 30 minutes at 16 °C, 30 minutes at 42 °C, 5 minutes at 85 °C and then held at 4 °C. Total cDNA for mRNA analysis was obtained from total RNA using the SuperScript II Reverse Transcriptase (Invitrogen, Paisley, UK). Each reaction contained 1 mg of total RNA, 1X SuperScript II buffer, 10 U/mL SuperScript II RT,

0.15 mg/mL of random hexamer primers (Invitrogen, Paisley, UK), 1 U/mL of RNase inhibitor (Promega, Madison, WI, USA) and 0.25 mM each of dNTPs. Cycling conditions were the following: 10 minutes at 25 °C, 30 minutes at 48 °C, 5 minutes at 95 °C. cDNA was stored at -20 °C. *RNU48*, *U6*, *B2M* and *HPRT* were selected as housekeeping genes for human miRNA, rat miRNA, human mRNA and rat mRNA analysis due to their stability across all the groups.

### **TaqMan qPCR analysis of mature miRNAs and mRNAs**

For quantitative PCR (qPCR), 10 µL reactions were incubated in a 386-well optical plate at 95 °C for 10 minutes, followed by 40 cycles of 95 °C for 15 seconds and 60 °C for 1 minute. Results were normalized to *U6* or *RNU48* values for rat and human miRNAs respectively and to *B2M* or *HPRT* for gene expression in human and rat samples respectively. The fold change for every miRNA/gene of interest was obtained using the  $\Delta\Delta C_t$  method. The qPCRs for each miRNA/gene were run in triplicate and results are presented as the mean  $\pm$  standard error of samples.

### **miRNA PCR array profiling of BOECs**

Total RNA was extracted from ~400,000 BOECs per subject, using the miRNeasy mini kit according to manufacturer's instructions, and including the optional on-column DNAase treatment step (Qiagen). The high quality of each extracted RNA sample was confirmed by evaluating both the purity (i.e., A260/A280 and A260/A230 ratios consistently between 1.9-2.1, as measured by NanoDrop 2000 spectrophotometer) and integrity (Agilent Bioanalyzer RIN numbers ranged between 9.7-10). miRNAs were measured using the complete integrated line of reagents from the miScript PCR system (Qiagen). Briefly, 750 ng of total RNA were reverse

transcribed according to manufacturer's instructions in the miScript II RT kit (HiSpec option; Qiagen). Global miRNA profiling was performed with human miRNome miScript miRNA PCR arrays (V16.0, 384-well, Qiagen). The manufacturer's recommended PCR cycling conditions were followed for 40 cycles on a CFX384 real-time PCR machine (Biorad, Hercules, CA, USA), with a terminal melt curve. Raw PCR quantification cycles (Cq) were preprocessed prior to analysis by converting Cq values > 35 to the predefined detection limit of 35, in accordance with manufacturer's recommendations. Expression levels were normalized using a mean-centering restricted approach. Hierarchical clustering and statistical analysis were performed with Partek Genomics Suite (V6.6, Chesterfield, MO, USA).

### **Gene regulation of *BMPR2*, *PTBP1*, *SMAD1*, *SMAD5*, *PKM2* and *HIF1A* and miR-124 expression using siRNA or mimic sequences**

BOECs were seeded in 6-well plates ( $2 \times 10^5$  cells/well) and grown for one day in normal medium (EGM-2 MV 10% FBS, Lonza, Workingham, UK). Prior to transfection, cells were incubated in Optimem I for 2 hours. BOECs were transfected on Day 0 with a final concentration of 10 nM siRNA with an On-TARGETplus siRNA for *BMPR2*, *SMAD1*, *SMAD5* and *PKM2* (Dharmacon™, Lafayette, CO, USA), a Silencer® for *PTBP1*, *LIMK1* and *HIF1A* (Thermo Fisher Scientific Inc., Waltham, MA, USA), or siScramble (Thermo Fisher Scientific Inc., Waltham, MA, USA) in complex with DharmaFECT1™ (4 µl/well) diluted in Optimem I. For the up-regulation of miR-124, cells were transfected on Day 0 with a final concentration of 0.1 nM with a Pre-miR™ miRNA Precursor specific for miR-124 or with a Pre-miR™ miRNA scramble negative control (Applied Biosystems, Foster City, CA, USA).

DharmaFECT1™ was incubated in half the final volume (200 µl for 1 well) of

Optimem I for 5 minutes followed by addition of Optimem I (200  $\mu$ l for 1 well) containing 10X final concentration of the relevant siRNA, making the final concentration of siRNA 5X. The mix was incubated for 20 minutes at room temperature to allow lipoplexes to form. The transfection mix (400  $\mu$ l/well) was dropped onto cells in fresh Optimem I (1.6 ml/well), ensuring full coverage of the well. Cells were incubated with the complexes for 4 hours at 37 °C, followed by replacement with EGM-2 MV 10% FBS. RNA was extracted as indicated in the figure legends.

### **LIMK inhibition**

To obtain specific inhibition of both LIMK1 and LIMK2, control BOECs were seeded in 6-well plates ( $2 \times 10^5$  cells/well) and grown for one day in normal medium (EGM-2 MV 10% FBS, Lonza). After 24 hours, EGM-2MV media was replaced with 10% FBS, growth factor-free EBM-2MV media (Lonza) and left overnight. Then cells were treated with DMSO vehicle or indicated concentration of LIMKi (3 or 10  $\mu$ M) for 1 or 3 hours before RNA was extracted and examined for gene expression as previously reported<sup>4</sup>.

### **Western blotting**

Cultured human BOECs or frozen rat lung tissue were homogenized in lysis buffer (250 mmol/L Tris-HCl, pH 6.8, 4% SDS, 20% v/v glycerol, and 1X EDTA-free protease inhibitor cocktail, Roche, West Sussex, United Kingdom) and sonicated for  $\approx$ 1 minute, and then centrifuged for 15 minutes at 15,000 x g. Protein concentration was determined using the Bio-Rad Lowry assay (Bio-Rad Laboratories, Hemel Hempstead, United Kingdom), using BSA as the standard. An equal amount of

protein (10 µg) from each sample was diluted with 5X sample loading buffer and boiled for 5 minutes. The protein suspensions were separated by SDS-PAGE and transferred to a PVDF membrane and incubated with blocking buffer. Membranes were probed for PTBP1 (1:1000, goat polyclonal antibody, Abcam, Cambridge, United Kingdom). Blots were then incubated with an appropriate horseradish-peroxidase-conjugated antibody and enhanced chemiluminescence reagent (GE Bioscience, Little Chalfont, United Kingdom). To confirm equal loading blots were incubated with an anti-β-actin antibody (Sigma–Aldrich, Poole, United Kingdom).

### **BOECs protein extraction for the proteomic study**

BOECs from 4 healthy controls and 4 HPAH patients with *BMPR2* mutations were plated at the same cell density and cultured in normal medium (EGM-2 MV 10% FBS, Lonza) until they reached confluence. BOECs were rinsed twice with cold PBS before being flash frozen on a bath of dry ice mixed with methanol for 30 seconds. The flask containing the BOECs were then removed from the dry ice bath and lysis buffer (50 mM Tris-HCl, pH 8, 150 mM NaCl, 1% IGEPAL CA-630, 0.5% deoxycholate, 0.1% SDS and 1X EDTA-free protease inhibitor cocktail) was added to the frozen monolayer of cells which was scraped for whole cell lysate collection. The whole cell protein lysates were then vortexed for 30 seconds, sonicated at 4 °C and centrifuged at 14,000 x g for 15 minutes at 4 °C. The supernatant was kept at -80 °C.

### **Protein digestion and peptide labelling with iTRAQ reagents**

Protein samples (150 µg) obtained from BOECs were cleaned up by three stepwise additions of cold acetone (kept at -20 °C) to a final of 6 volumes added. The protein

samples were incubated at -20 °C for 90 minutes and were vortexed every 15 minutes. Samples were centrifuged at 14,000 x g for 10 minutes at 4 °C to obtain a protein pellet. Acetone was decanted and once entirely evaporated, each protein pellet was suspended in iTRAQ TEAB buffer (1 M TEAB, 0.2% SDS, 6 M Urea, 1% NP-40). Thereafter, protein samples were quantified with the 2-D Quant Kit (GE Bioscience, Little Chalfont, UK) before being diluted at 2.5 mg/mL with TEAB buffer. Protein samples were quantified again with the 2-D Quant kit and 100 µg of protein from each BOEC sample were processed for further reduction, alkylation, digestion and iTRAQ labelling using iTRAQ Reagents Multiplex Kit (Applied Biosystems, Foster City, CA, USA) according to the manufacturer's protocol. Briefly, protein samples were reduced with 5 mM tris-(2carboxyethyl)phosphine (TCEP) at 37 °C for 1 hour and the cysteine groups were blocked using a 10 mM methyl methanethiosulfonate (MMTS) solution at room temperature for 10 minutes. Protein samples were then digested with Lys-C (1:50, Promega, Madison, WI, USA) at 37 °C for 2 hours and the reaction was stopped with 10% trifluoroacetic acid (TFA). Proteins were further digested with trypsin (1:20, Applied Biosystems, Foster City, CA, USA) at 37 °C for 16 hours<sup>5</sup>. Digestion efficiency was performed by 1-D gel electrophoresis and Sypro Ruby gel staining. Peptide samples were dried completely before being suspended in TEAB for labelling. Each peptide sample was labelled at room temperature for 2 hours with one iTRAQ reagent vial (mass tag 113, 114, 115, 116, 117, 118, 119 and 121) previously reconstituted with 200 µl of isopropanol<sup>6</sup>. Samples from the 8 different conditions and labelled respectively with the different iTRAQ reagents were then combined. The volume of the combined sample was reduced using the speed vacuum for 2 hours or more until a brown pellet was obtained.



## **Peptide OFFGEL fractionation**

For pI-based peptide separation, we used the 3100 OFFGEL Fractionator (Agilent Technologies, Santa Clara, CA, USA) with a 24-well set-up. The peptide sample was diluted to a final volume of respectively 3.6 ml using OFFGEL peptide sample solution (Agilent Technologies, Santa Clara, CA, USA). The IPG strip of 24 cm long with a 3–10 linear pH range (Agilent Technologies) was rehydrated in the IPG strip rehydration buffer according to the manufacturer's protocol for 15 minutes. Then, 150 µl of peptide sample was loaded in each well. Electrofocusing of the peptides was performed at 20 °C and 50 µA until the 50 kVh level was reached. After focusing, the 24-peptide fractions were withdrawn and the wells rinsed with 150 µl of a solution of water/methanol/formic acid (49:50:1) for 15 minutes after which the rinsing solutions were pooled with their corresponding peptide fraction. All fractions were evaporated by centrifugation under vacuum and maintained at -20 °C until processed for mass spectrometry analysis. Proteomics analysis was performed at the OHRI Proteomics Core Facility (Ottawa, Canada).

## **2D LC-MS/MS**

All HPLC solvents were Optima LC-MS grade from Fisher Scientific. The OFFGEL fractions were concentrated by vacufuge, purified by ZipTip (Millipore, Billerica, MA, USA), and diluted in 1% formic acid in water. Peptides were analyzed by two-dimensional liquid chromatography – tandem mass spectrometry (2D LC-MS/MS) using an UltiMate 3000 RSLC nano HPLC (Dionex) and an LTQ Orbitrap XL hybrid mass spectrometer with nanospray ionization source (Thermo Fisher Scientific Inc., Waltham, MA, USA). The system was controlled by Xcalibur software version 2.0.7

(Thermo Fisher Scientific Inc.). Peptides were loaded by autosampler onto an SCX column (POROS 10S, 300  $\mu\text{m}$  x 10 cm; Dionex P/N 164565) and eluted by injections of 0, 10, 20, 50, 100, 500 and 1000 mM of ammonium acetate with 0.1% formic acid. Each eluted fraction was collected on a C18 trap column (Peptide CapTrap, Michrom Bioresources Inc., Auburn, CA, USA) for 5 minutes at a flow rate of 15  $\mu\text{l}$  per minute and then eluted over a 60 minute gradient of 3% - 45% acetonitrile with 0.1% formic acid at a flow rate of 0.3  $\mu\text{l}$  per minute onto a 10 cm long column with integrated emitter tip (Picofrit PF360-75-15-N-5 (New Objective) packed with Zorbax SB-C18 5 micron (Agilent Technologies, Santa Clara, CA)), and nanosprayed into the mass spectrometer. MS scans were acquired in FTMS mode at a resolution setting of 60,000. MS2 scans were acquired in both ion trap collisionally-induced dissociation (IT-CID) and Orbitrap high-energy collisional dissociation (FT-HCD) modes using data-dependent acquisition of the top 3 ions from each MS scan. Dynamic exclusion window was 30 seconds.

### **Peaklist generation**

From each .raw file, a peak list in .mgf format was generated by using the computer program extract\_msn (Thermo Fisher Scientific Inc.). Extract\_msn parameters were -M0.1 -B800 -G1 -I10 -R2 -r8. The .mgf files from each HPLC fraction were concatenated to generate one peak list file per OFFGEL fraction. The computer program HCD\_CID\_merger.pl ([http://web.expasy.org/HCD\\_CID\\_merger/HCD\\_CID\\_merger\\_doc.html](http://web.expasy.org/HCD_CID_merger/HCD_CID_merger_doc.html)) was used to generate a “merged” peak list in which the 112 – 122 m/z range was copied from each HCD scan and added into the corresponding IT-CID spectrum. As described in (<http://dx.doi.org/10.1016/j.jprot.2009.10.015>) this method is intended to combine the

sensitivity of IT-CID for peptide identification with the ability of FT-HCD spectra to detect low mass iTRAQ reporter ions. Peak lists with only the HCD spectra and only the CID spectra were also generated using this software tool. The processed peak lists (HCD spectra only or merged spectra only) for each OFFGEL fraction were then concatenated to produce the final peak list. A total of 20,954 peptides were identified. Mascot's peptide significance threshold was set to the default value (5%). The false discovery rate was set at 1%.

### **Protein identification using Mascot**

Mascot software version 2.4 (Matrix Science, Boston, MA, USA) was used to infer peptide and protein identities from the mass spectra. The peak lists representing the observed MS/MS spectra were matched against a custom database of protein sequences (human sequences from the 2011\_07 version of uniprot\_sprot.fasta.gz downloaded from ftp.uniprot.org concatenated with a Contaminants database downloaded from maxquant.org, June 9th 2011). Mass tolerance parameters were  $MS \pm 10$  ppm and  $MS/MS \pm 0.6$  Da. Reporter ion tolerance was 0.1 Da. Enzyme specificity was set to 'Trypsin/P' with  $\leq 3$  miscuts. Methylthiolation of cysteine was set as a fixed modification (due to MMTS treatment). Oxidation of methionine, deamidation and iTRAQ modification of tyrosine were allowed as variable modifications. Quantitation mode was set to 'iTRAQ (8-plex)'. Note that Mascot does not quantify any peptides with iTRAQ modification of tyrosine because the labeling of tyrosine is assumed to be an incomplete reaction. To check for efficiency of iTRAQ labeling, searches were also conducted with iTRAQ (8-plex) modification as a variable modification on lysines and peptide N-termini.

## **Protein candidate selection**

To select protein candidates that are more likely to be dysregulated in PAH, we analyzed the Mascot results obtained as above. We were able to quantify a total of 1176 proteins, although some of these have missing values for one channel or more. We then followed the ratio methods of the R package *isobar*<sup>7</sup> to select candidates for further analyses: first we fitted the log-ratios between replicates to a mixture of a Gaussian and a Cauchy probability distributions and used it to assign probabilities to the log-ratios between and HPAH cases and healthy control. Given a positive (negative) log-ratio, we used the right (left) tail of the fitted mixture distribution to assign to it a probability of having a higher (lower) value. The three  $p$ -values for the healthy/healthy log-ratios are combined into a single  $p$ -value. In the same way, the four  $p$ -values for the pah/healthy are also combined into one (Suppl. Table 4). As there are missing values, these calculations take into account the number of  $p$ -values that are used relative to the maximum possible number of  $p$ -values (i.e. 3 or 4). A good candidate to be deregulated in HPAH will have a low combined pah/healthy  $p$ -value and a high healthy/healthy combined  $p$ -value (Suppl. Table 3).

## **Mining of miRNA predicted protein targets**

We investigated the candidates we obtained from microRNA PCR arrays (Suppl. Table 2) and iTRAQ for coordinated dysregulation of miRNA and their predicted target proteins by mining miRNA target prediction databases. We selected a total of 76 candidate proteins (39 downregulated and 37 upregulated) as the most likely to be dysregulated in HPAH by applying the liberal cut-offs of  $p$ -value  $<0.15$  for PAH/healthy and  $p$ -value  $>0.35$  for healthy/healthy. First, we obtained all the predicted targets for selected miRNAs that showed dysregulation in HPAH from

available software and databases: miRDB (MirTarget2)<sup>8</sup>, PicTar<sup>9</sup>, miRanda<sup>10</sup>. Then we mapped the predicted targets to proteins, and we filtered the results to find pairs of miRNA and proteins that are dysregulated in opposing directions in our profiling experiments. For example, if a miRNA is upregulated in HPAH, the set of downregulated proteins are used to filter its predicted targets. The resulting pairs are displayed in Suppl. Table 5.

### **Glycolytic flux**

Glycolytic flux of cells was measured by monitoring the conversion of 5-<sup>3</sup>H-glucose to <sup>3</sup>H<sub>2</sub>O as previously described<sup>11</sup>. Briefly, 2 x 10<sup>5</sup> cells/well (BOECs from HPAH or healthy controls, or control PAECs) were plated in a 48-well plate in normal medium (EGM-2 MV 10% FBS, Lonza). Twenty four hours after being seeded (or 48 to 72 hours post-transfection as indicated in figure legend) 5-<sup>3</sup>H-glucose (PerkinElmer Life Sciences Inc., Boston, MA, USA) was added to each well to a final concentration of 0.5 μCi/well (0.0185 MBq/well) (0.1 μl/well). Samples were incubated for 2 hours at 37 °C in a humidified incubator under 5% CO<sub>2</sub>. After that, 200 μl/well of supernatant were collected and placed into glass vials containing hanging wells carrying filter paper soaked with H<sub>2</sub>O. The vials were capped, sealed with rubber stoppers, and incubated for 2-3 days at 37 °C in the incubator to reach equilibrium. During the incubation, <sup>3</sup>H<sub>2</sub>O generated by glycolysis diffused from the bottom of the glass vials to the filter paper carried by the hanging wells through evaporation, condensation and absorption. The filter paper was then transferred into scintillation vials containing 5 ml of scintillation liquid and counted in a scintillation counter. Appropriate <sup>3</sup>H-glucose-only and <sup>3</sup>H<sub>2</sub>O-only controls were included, enabling the calculation of <sup>3</sup>H<sub>2</sub>O in each sample and thus the rate of glycolysis as previously described<sup>11</sup>.

### **Lactate detection**

Lactate concentration in supernatants overlying culture cells was determined using the L-Lactate assay kit (Abcam, Cambridge, UK) following the manufacturer's instructions. Briefly, lactate was converted to pyruvate and hydrogen peroxide ( $H_2O_2$ ) by lactate oxidase.  $H_2O_2$  in the presence of a peroxidase subsequently catalyzes oxidative condensation of a precursor, producing a chromogen with an absorption maximum at 570 nm. This signal was then normalized to total protein content for each sample.

### **TCA cycle flux**

TCA cycle flux of cells was measured by monitoring the conversion of D-[6- $^{14}C$ ]-glucose to  $^{14}CO_2$ . Briefly,  $8 \times 10^4$  cells/well (BOECs from HPAH or healthy controls) were plated in a 12-well plate in normal medium (EGM-2 MV 10% FBS, Lonza). Twenty four hours after being seeded (or 48 to 72 hours post-transfection as indicated in figure legend) D-[6- $^{14}C$ ]-glucose (PerkinElmer Life Sciences Inc.) was added to each well to a final concentration of  $0.55 \mu Ci/well$  ( $0.02 MBq/well$ ). Samples were incubated for 6 hours at  $37^\circ C$  in a humidified incubator under 5%  $CO_2$ . After that, filter paper ( $2.7 \times 2.7$  cm), soaked in 1X hyamine was put on the lid of the 12-well plate to fully cover each well.  $250 \mu l$  of 3 M perchloric acid were added to each well to lyse the cells and release  $CO_2$ , which was captured by the hyamine on the filter paper in the lid of the 12-well plates. This step was performed in a fume hood designated for radioactive substance use. Each plate was sealed with parafilm and left overnight at room temperature in a fume hood designated for radioactive substance use to ensure absorption of the  $^{14}CO_2$ . The filter paper was then

transferred into scintillation vials containing 5 ml of scintillation liquid and counted in a scintillation counter. Appropriate D-[6-<sup>14</sup>C]-glucose-only and blank controls were included, enabling the calculation of <sup>14</sup>CO<sub>2</sub> in each sample and thus the TCA cycle flux.

### **Proliferation assay**

BOECs were maintained in complete microvascular endothelial cell growth medium-2 (EGM-2MV 10% FBS, Lonza) and were used at passages 4–6. Cells were plated in 24-well plates at 10,000 cells per well, then quiesced in serum-free medium for 4 hours. Cells were counted on days 0, 2, 5 and 7 using trypan blue exclusion.

### **Migration assay**

BOECs from control and *BMPR2* mutant lines were trypsinised and seeded into ibidi (Munich, Germany) culture inserts at 45,000 cells per chamber creating a uniform cell free gap. After 24 hours inserts were removed and cells were treated with EBM-2 (2% FBS, 20 mM HEPES and 2 μM Hydroxyurea). Time-lapse microscopy of duplicate wells was undertaken using a Leica SPE imaging system. Images were taken every 5 minutes for 18 hours at 37 °C. Images were imported into ImageJ and 10 cells per chamber were manually tracked using a plugin macro ([rsbweb.nih.gov/ij/plugins/track/track.html](http://rsbweb.nih.gov/ij/plugins/track/track.html)). Distance was calculated using the manual tracking plugin. Furthest migrated was based on the largest X coordinate subtracted from the X coordinate at time 0.

### **Immunohistochemistry**

Fixed sections of human or rat lung tissue (5 μm in thickness) were processed using

PT Link following the manufacturer's instructions (DakoCytomation, Ely, UK). Endogenous tissue peroxidase was quenched using hydrogen peroxidase (HP) blocking solution (DakoCytomation). Polyclonal rabbit-anti-human or rat PTBP1 (Abcam, Cambridge, UK), was labelled using an affinity purified anti-rabbit streptavidin biotin complex (StreptABC) peroxidase (Vector Laboratories, Peterborough, UK), visualised using 3-3' diaminobenzidine hydrochloride (DAB) substrate (DakoCytomation) and counterstained in Carrazzi's haematoxylin (DakoCytomation).

### **Immunofluorescence**

BOECs were seeded onto BD Falcon™ glass chamberslides (BD Biosciences, Oxford, UK) coated with 0.1% gelatin solution and cultured for 48 hours prior to treatment. After treatment the chamberslides were washed with PBS, fixed with 4% paraformaldehyde and permeabilised with 0.5% Triton-X-100. Prior to staining cells were blocked with 0.5% BSA. PKM-2 was labelled with mouse anti-human-PKM2 (Schebo-Biotech UK, Basingstoke, UK) and a secondary goat anti-mouse Alexa-Fluor 488 (Life Technologies, Glasgow, UK). Chamberslides were counterstained with Phalloidin Alexa-Fluor 594 (Life Technologies) and mounted in glycerol/PBS solution containing DAPI (Vectashield, Vector Laboratories). Cells were viewed and photographed using a confocal microscope (Leica TCS SPE) and images captured using Leica LAS AF software.

### **Supplemental References**

1. D'Alessandro A, Gray AD, Szczepiorkowski ZM, Hansen K, Herschel LH and Dumont LJ. Red blood cell metabolic responses to refrigerated storage, rejuvenation, and frozen storage. *Transfusion*. 2017;57:1019-1030.



2. Xia J, Sinelnikov IV, Han B and Wishart DS. MetaboAnalyst 3.0--making metabolomics more meaningful. *Nucleic Acids Res.* 2015;43:W251-7.
3. Aasa KL, Zavan B, Luna RL, Wong PG, Ventura NM, Tse MY, Carmeliet P, Adams MA, Pang SC and Croy BA. Placental growth factor influences maternal cardiovascular adaptation to pregnancy in mice. *Biology of reproduction.* 2015;92:44.
4. Scott RW, Hooper S, Crighton D, Li A, Konig I, Munro J, Trivier E, Wickman G, Morin P, Croft DR, Dawson J, Machesky L, Anderson KI, Sahai EA and Olson MF. LIM kinases are required for invasive path generation by tumor and tumor-associated stromal cells. *J Cell Biol.* 2010;191:169-85.
5. Phanstiel DH, Brumbaugh J, Wenger CD, Tian S, Probasco MD, Bailey DJ, Swaney DL, Tervo MA, Bolin JM, Ruotti V, Stewart R, Thomson JA and Coon JJ. Proteomic and phosphoproteomic comparison of human ES and iPS cells. *Nature methods.* 2011;8:821-7.
6. Stensjo K, Ow SY, Barrios-Llerena ME, Lindblad P and Wright PC. An iTRAQ-based quantitative analysis to elaborate the proteomic response of *Nostoc* sp. PCC 7120 under N<sub>2</sub> fixing conditions. *Journal of proteome research.* 2007;6:621-35.
7. Breitwieser FP, Muller A, Dayon L, Kocher T, Hainard A, Pichler P, Schmidt-Erfurth U, Superti-Furga G, Sanchez JC, Mechtler K, Bennett KL and Colinge J. General statistical modeling of data from protein relative expression isobaric tags. *Journal of proteome research.* 2011;10:2758-66.
8. Wong N and Wang X. miRDB: an online resource for microRNA target prediction and functional annotations. *Nucleic Acids Res.* 2015;43:D146-52.
9. Krek A, Grun D, Poy MN, Wolf R, Rosenberg L, Epstein EJ, MacMenamin P, da Piedade I, Gunsalus KC, Stoffel M and Rajewsky N. Combinatorial microRNA target predictions. *Nature genetics.* 2005;37:495-500.
10. John B, Enright AJ, Aravin A, Tuschl T, Sander C and Marks DS. Human MicroRNA targets. *PLoS biology.* 2004;2:e363.
11. Xu W, Koeck T, Lara AR, Neumann D, DiFilippo FP, Koo M, Janocha AJ, Masri FA, Arroliga AC, Jennings C, Dweik RA, Tudor RM, Stuehr DJ and Erzurum SC. Alterations of cellular bioenergetics in pulmonary artery endothelial cells. *Proc Natl Acad Sci U S A.* 2007;104:1342-7.

## Supplemental Figures

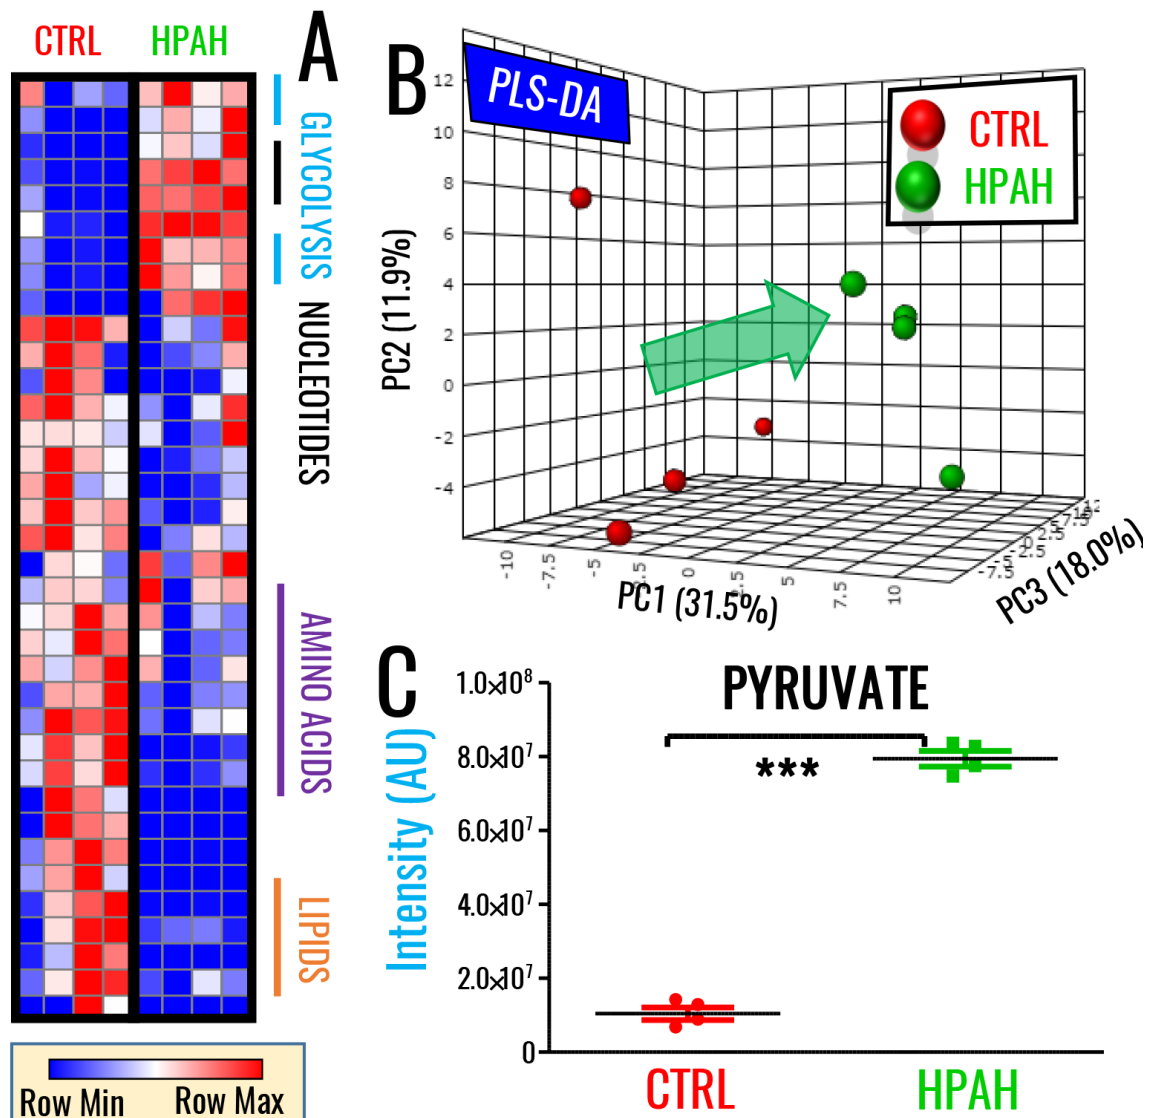

**Suppl. Figure 1. UHPLC-MS Metabolomics of HPAH and control BOECs.** (A) Heat map showing a schematic representation of the top 50 metabolites (by lowest  $p$ -value,  $t$ -test) either increasing or decreasing in HPAH BOECs harboring a mutation in *BMP2* ( $n=4$ ) in comparison to control counterparts ( $n=4$ , blue: low; red: high). This group was enriched with metabolites from glycolysis, nucleotides, amino acids and lipids, as determined through Metaboanalyst 3.0. (B) Metabolic phenotypes were sufficiently different between the two groups to afford clustering of samples upon

partial least square-discriminant analysis (PLS-DA). (C) Pyruvate was the most statistically significant metabolic change between the two groups (\*\* $p < 0.001$ ).

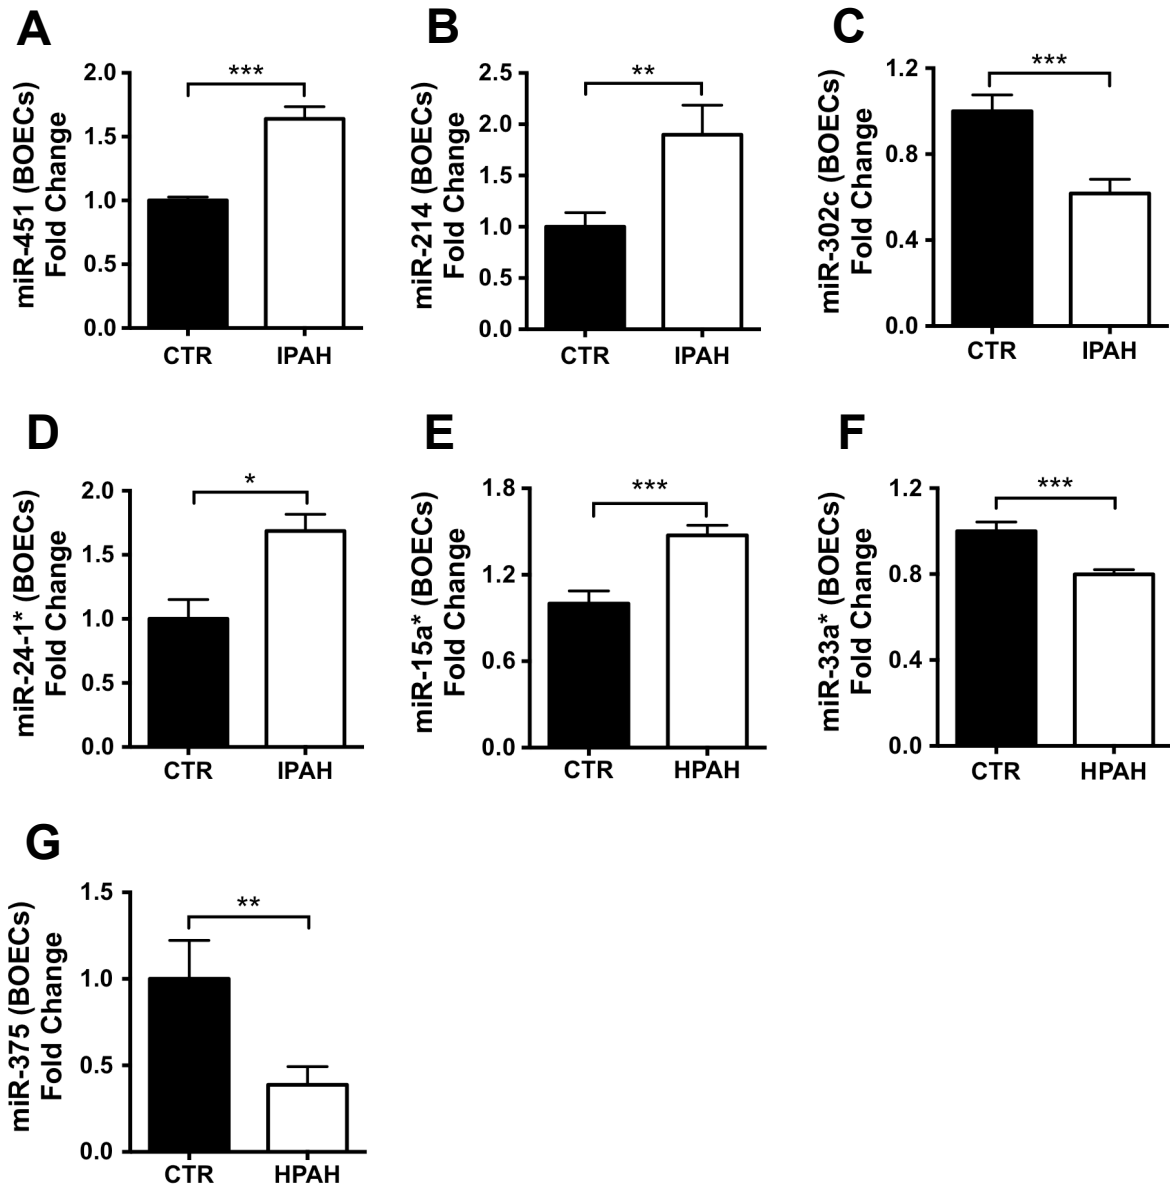

**Suppl.Figure2. Validation of the expression of selected miRNAs dysregulated in the PCR-array study. (A-G)** The expression of selected miRNAs, dysregulated in the PCR-array but not significantly after false rate discovery correction due to the relatively modest sample size, was validated in 7 HPAH, 5 IPAH and 8 control BOEC lines. In all cases, miRNA dysregulation followed the trend observed in the array as shown in Suppl.Table2, and in all cases the dysregulation was statistically significant. Data were analyzed using an unpaired *t*-test (\*\* $p < 0.001$ , \*\* $p < 0.01$ , \* $p < 0.05$ ).

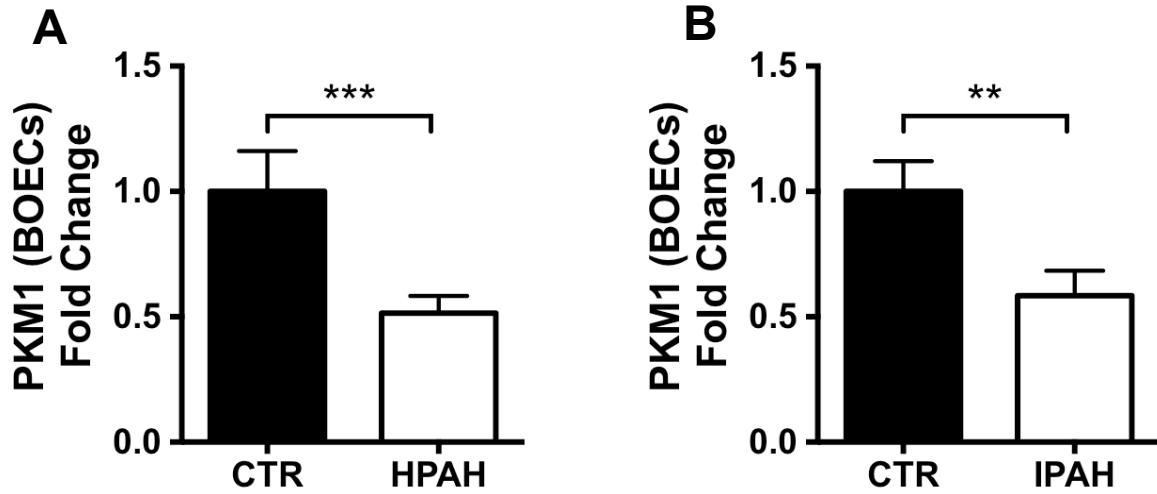

Suppl.Figure3. *PKM1* is downregulated in BOECs isolated from PAH patients.

(A-B) The expression of *PKM1* was assessed by qPCR in BOECs isolated from HPAH (A, n=7) or IPAHA (B, n=5) patients versus controls (n=8). Data were analyzed using an unpaired *t*-test (\*\* $p < 0.01$ , \*\*\* $p < 0.001$ ).

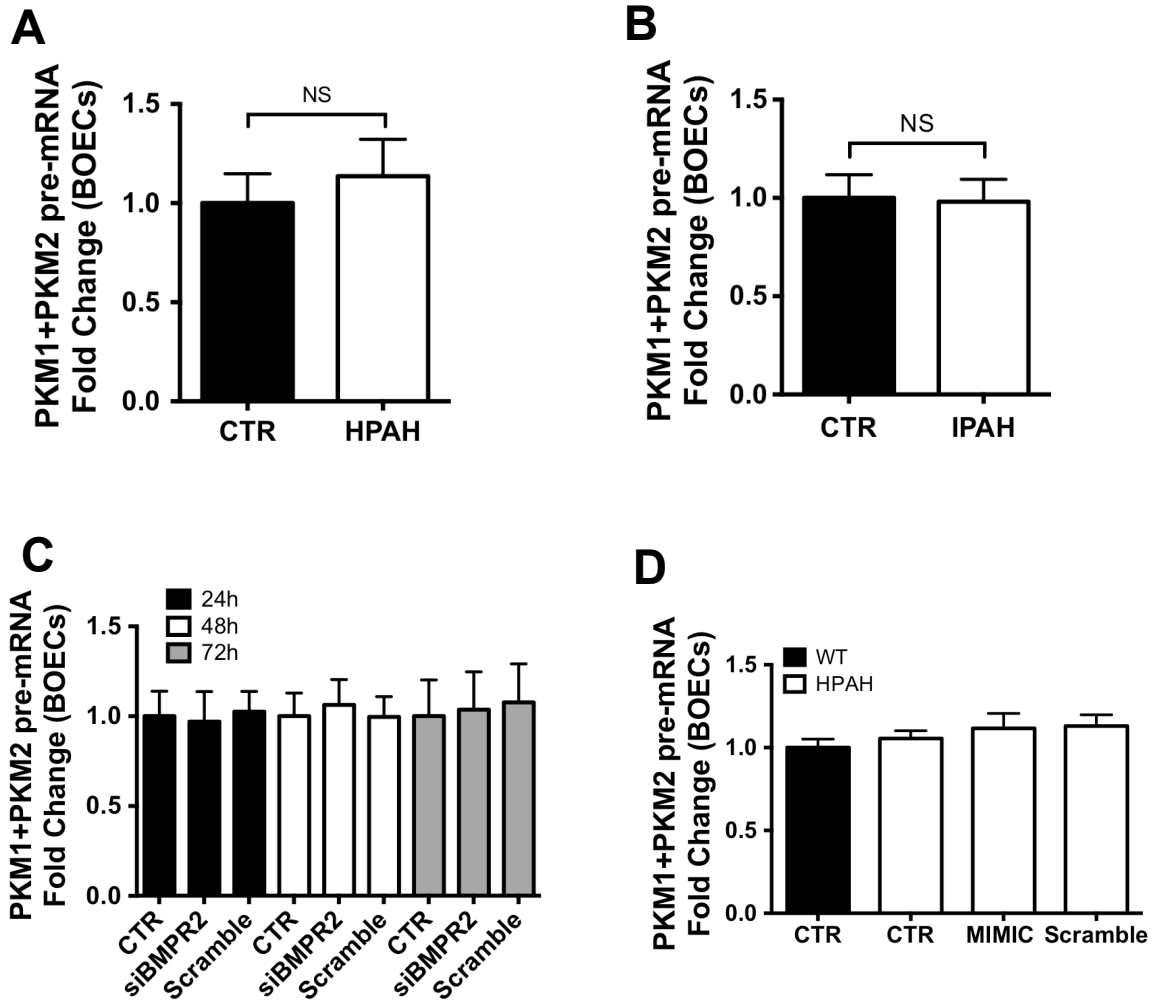

**Suppl. Figure 4. The precursor mRNA coding for both PKM1 and PKM2 is not dysregulated in BOECs isolated from PAH patients, in control cells treated with a siBMPR2 or in miR-124 mimic-treated cells.** (A-B) Total RNA was isolated from HPAH (A, n=7), IPAHA (B, n=5) and control BOECs (n=8) and expression of the precursor mRNA was assessed by qPCR. (C) Control BOECs (n=3) were transfected in 6-well plates with a siBMPR2 or a scramble-control or treated with the transfection reagent alone (CTR) and total RNA was isolated 24, 48 and 72 hours post-transfection. The expression of the *PKM1+PKM2* precursor was assessed by qPCR. (D) HPAH BOECs (n=3) were transfected in 6-well plates with a miR-124 mimic or a scramble sequence as negative control or treated with the transfection reagent alone (CTR). The expression of the precursor coding for PKM1 and PKM2

was assessed after 48 hours by qPCR. Every sample was tested in triplicate. Data are presented as the mean  $\pm$  S.E.M. Data were analyzed using an unpaired *t*-test (A-B) or a 1-way ANOVA followed by Bonferroni post hoc test (C-D).

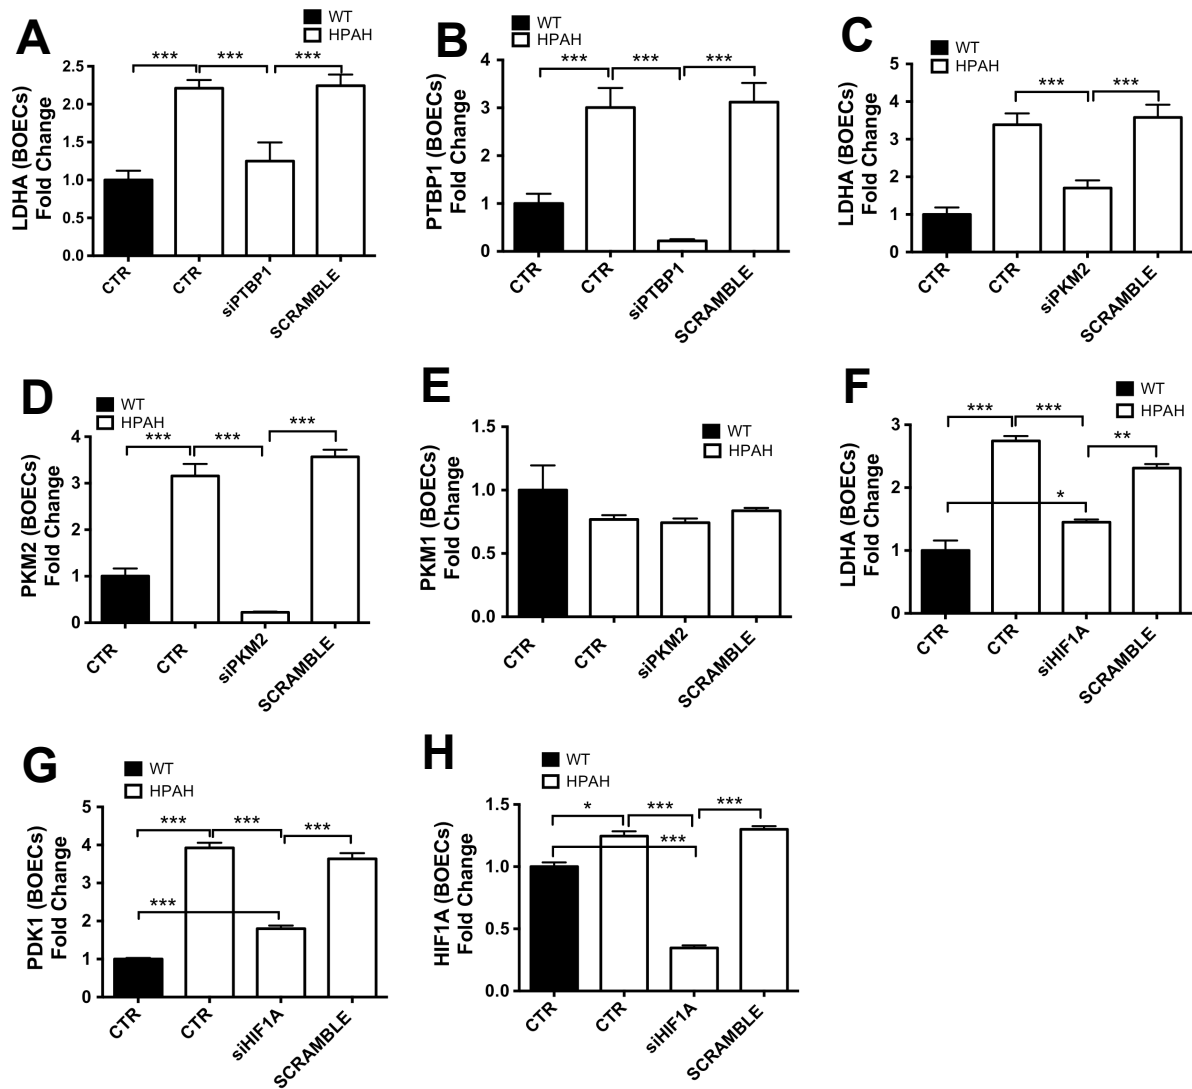

**Suppl. Figure 5. The downregulation of *PTBP1*, *PKM2* or *HIF1A* can reduce the expression of LDHA in BOECs.** (A-H) HPAH BOECs (n=3) were transfected with si*PTBP1*, si*PKM2*, si*HIF1A* or with a scrambled control. Cells treated with the transfection reagent alone were used as a negative control (CTR). Total RNA was extracted 48 hours post-transfection and analyzed by qPCR for the expression of LDHA (A, C, F), *PTBP1* (B), *PKM2* (D), *PKM1* (E), *PDK1* (G) and *HIF1A* (H). Gene expression was also assessed in control BOECs (n=3) to establish the basal level of expression in unaffected subjects. Data are presented as the mean  $\pm$  S.E.M. Samples were tested in triplicate. Data were analyzed using a 1-way ANOVA followed by Bonferroni post hoc test. (\* $p < 0.05$ , \*\* $p < 0.01$ , \*\*\* $p < 0.001$ ).



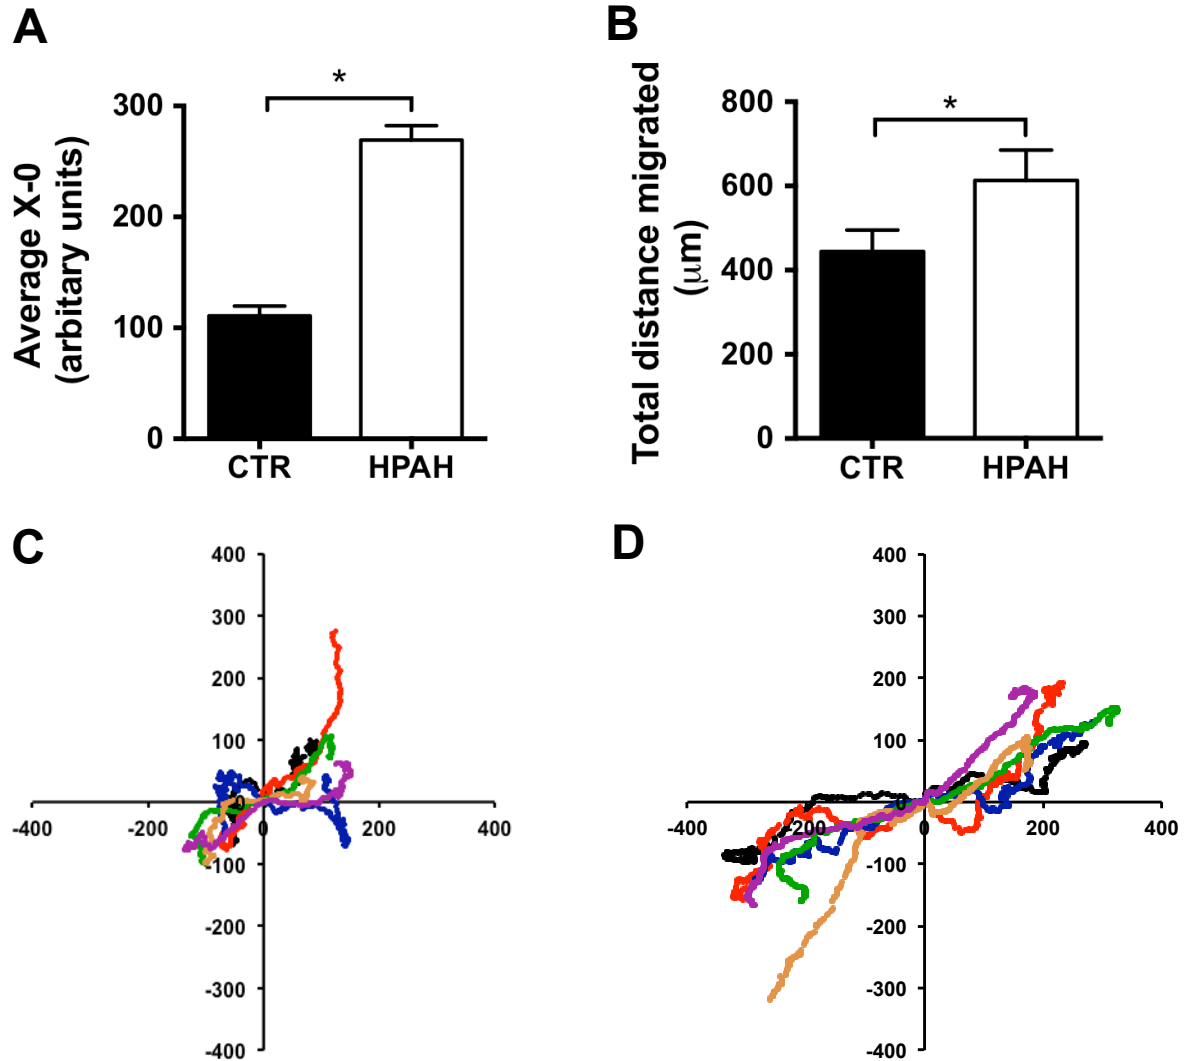

**Suppl. Figure 6. BOECs isolated from HPAH patients exhibit abnormal**

**migration.** To assess migration, control or HPAH cells (n=3) were seeded in ibidi

culture inserts. After 24 hours, inserts were removed and cells were treated with

EBM-2 (2% FBS, 20 mM HEPES and 2 mM Hydroxyurea). Time-lapse microscopy of

duplicate wells was undertaken using a Leica SPE imaging system. Images were

taken every 5 minutes for 18 hours at 37 °C. (A-B) Ten cells were tracked per well

from control and HPAH BOEC, respectively. Tracks were determined by cell nuclei

position and migration origin was superimposed at the zero-cross point. (C)

Quantification of BOEC migration using the distance migrated from zero-cross point

(X-0) and (D) total distance migrated. Data are presented as the mean ± S.E.M. Data

were analyzed using a paired *t*-test.

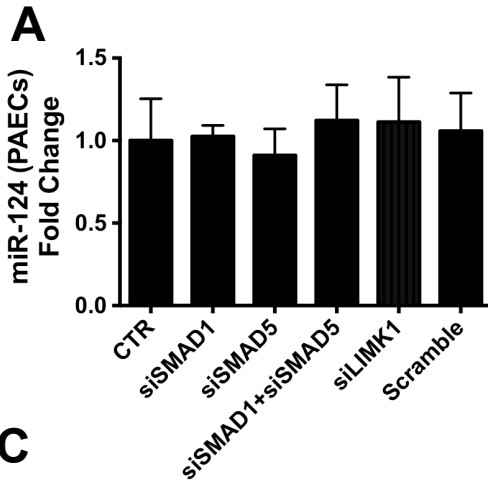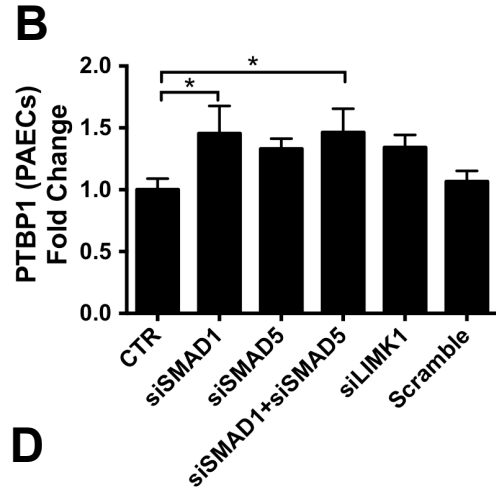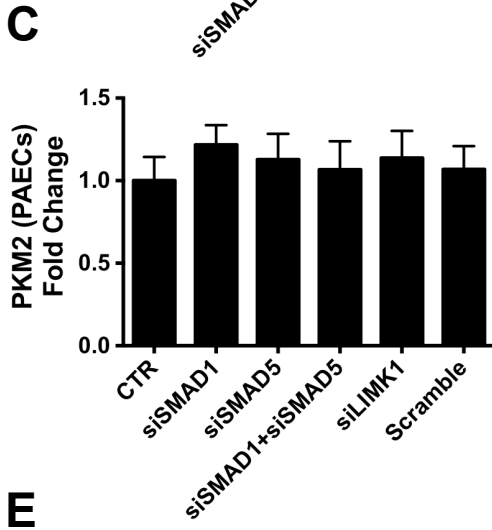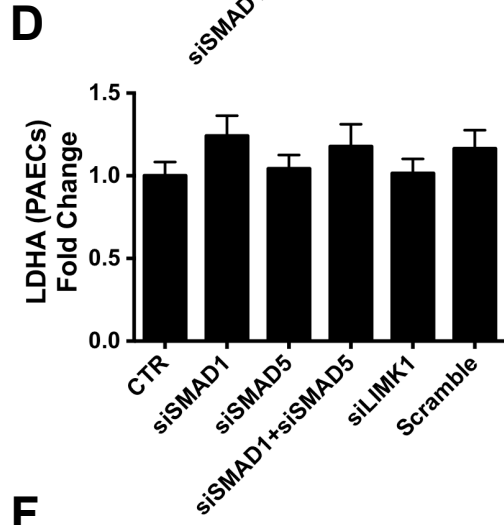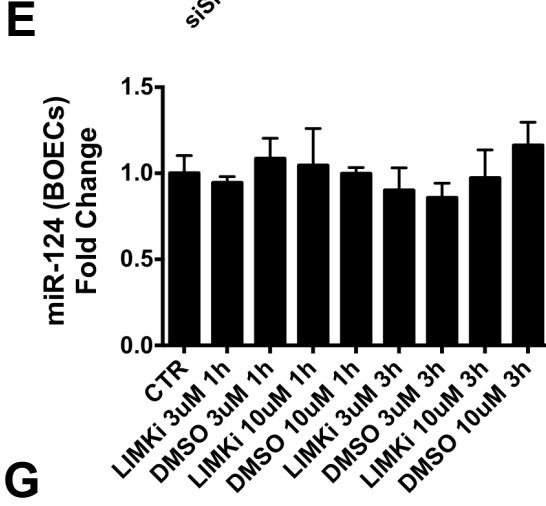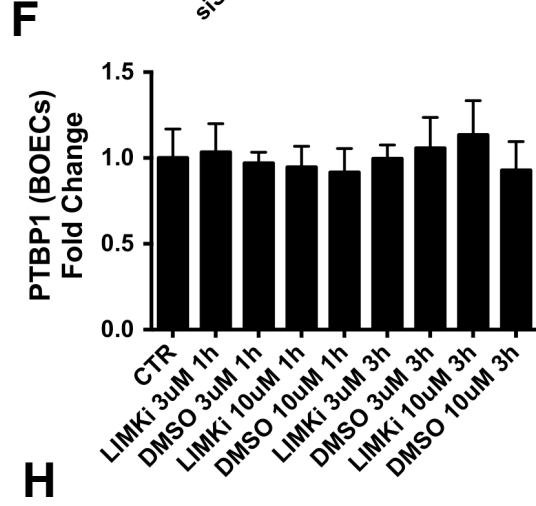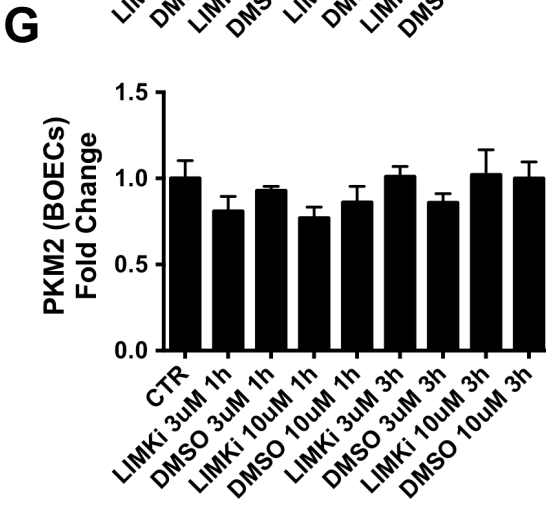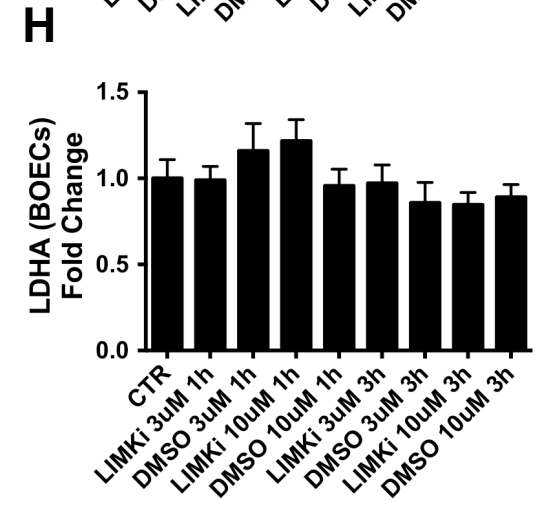

**Suppl.Figure7. Manipulation of *SMAD1*, *SMAD5* or *LIMKs* does not regulate the expression of the miR-124/PTBP1 pathway.** (A-D) Control PAECs were transfected with si*SMAD1*, si*SMAD5* or a si*LIMK1* and tested for the expression of miR-124 (A), *PTBP1* (B), *PKM2* (C), and *LDHA* (D) 48 hours post-transfection compared to transfection reagent alone (CTR) or scrambled siRNA (n=3). (E-H) Control BOECs were treated with 3 mM or 10 mM of a LIMK1 and 2 inhibitor (LIM Kinase Inhibitor I, LIMKi 3, Calbiochem) or DMSO as negative control or left untreated for comparison. Total RNA was then isolated after 1 and 3 hours for qPCR analysis. miR-124 (E), *PTBP1* (F), *PKM2* (G) and *LDHA* (H) expression were assessed as indicated in the different panels. Data are presented as the mean  $\pm$  S.E.M. Samples were tested in triplicate. Data were analyzed using a 1-way ANOVA followed by Bonferroni post hoc test. None of the results were statistically significant.

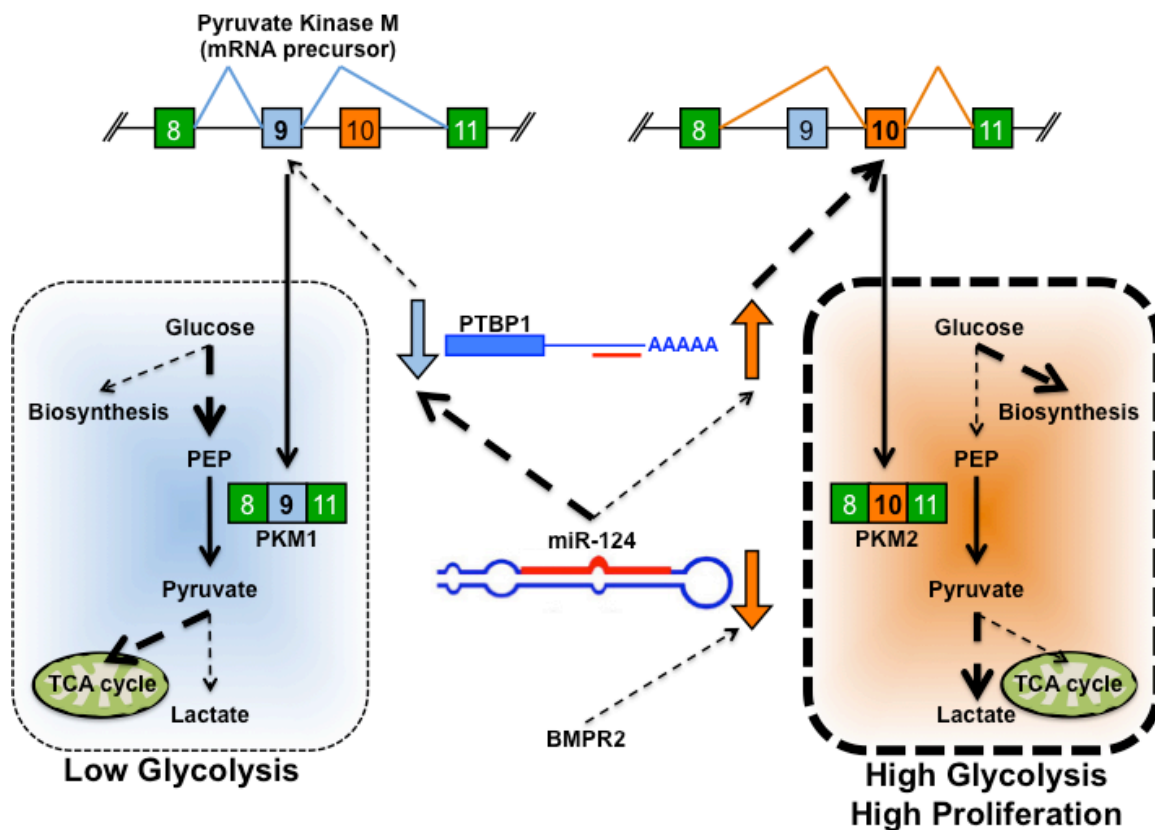

**Suppl.Figure8. Schematic diagram proposing the link between miR-124, PTBP1 and glycolysis via PKM2.** In the center of the model, miR-124 is regulated by *BMPR2* expression and it directly targets *PTBP1*, which regulates *PKM1* and *PKM2* expression. In particular, binding of *PTBP1* to the splice sites flanking exon 9 in PKM precursor transcript results in exon 9 exclusion and exon 10 inclusion, generating *PKM2* (as shown on the right side of the model). The thickness of the arrows leading to the panel on the right indicates the high glycolytic efficiency of cells with low miR-124 and high *PTBP1*. Vice versa, when *PTBP1* expression is reduced (on the left), exon 9 of the PKM precursor is included in the final transcript and *PKM1* is produced. This determines a low glycolytic level as symbolized by the thin arrows leading to the left side of the model.

Suppl. Table 1. Demographics of the HPAH and IPAH patients used for BOECs isolation

| Subject ID | Age | Sex | Ethnicity | mPAP | CI   | PVR   | 6 min walk   | Treatment    | PAH Classification | BMPR-II Mutation | microArray Study | qPCR Validation | Proteomic Study | Metabolon Study |
|------------|-----|-----|-----------|------|------|-------|--------------|--------------|--------------------|------------------|------------------|-----------------|-----------------|-----------------|
| BOEC-C1    | 45  | F   | Caucasian |      |      |       |              |              |                    |                  | ✓                | ✓               | ✓               | ✓               |
| BOEC-C2    | 20  | M   | Caucasian |      |      |       |              |              |                    |                  | ✓                | ✓               | ✓               |                 |
| BOEC-C3    | 40  | M   | Caucasian |      |      |       |              |              |                    |                  | ✓                | ✓               | ✓               |                 |
| BOEC-C4    | 30  | M   | Caucasian |      |      |       |              |              |                    |                  | ✓                | ✓               | ✓               | ✓               |
| BOEC-C6    | 37  | F   | Caucasian |      |      |       |              |              |                    |                  |                  | ✓               |                 | ✓               |
| BOEC-C7    | 41  | M   | Caucasian |      |      |       |              |              |                    |                  |                  | ✓               |                 |                 |
| BOEC-C8    | 38  | M   | Asian     |      |      |       |              |              |                    |                  |                  | ✓               |                 |                 |
| BOEC-C15   | 35  | F   | Caucasian |      |      |       |              |              |                    |                  |                  | ✓               |                 |                 |
| BOEC-C24   | 34  | F   | Caucasian |      |      |       |              |              |                    |                  |                  |                 |                 | ✓               |
| EPC-B1     | 45  | M   | Caucasian | 46   | 1.75 | 9.7   | 381          | ERA, PDEI    | heritable          | R320X            | ✓                | ✓               | ✓               | ✓               |
| EPC-B2     | 21  | M   | Caucasian | 71   | 1.8  | 16.4  | 360          | PGI, PDEI    | heritable          | W9X              | ✓                | ✓               | ✓               | ✓               |
| EPC-B4     | 35  | F   | Caucasian | 65   | 1.9  | n/a   | 459          | ERA, PDEI    | heritable          | W9X              | ✓                | ✓               | ✓               | ✓               |
| EPC-B9     | 79  | F   | Caucasian | 52   | 2.25 | 10.96 | 124          | PDEI         | heritable          | R584X            |                  | ✓               |                 | ✓               |
| EPC-B10    | 36  | F   | Asian     | 40   | 1.36 | 19.6  | 482          | ERA, PGI     | heritable          | R213X            | ✓                | ✓               | ✓               |                 |
| EPC-B11    | 32  | M   | Caucasian | 60   | 2.69 | 10.8  | 400          | PGI, PDEI    | heritable          | C.*-944/5GC-AT   |                  | ✓               |                 |                 |
| EPC-B14    | 49  | F   | Caucasian | 56   | 1.4  | ?     | not recorded | none         | heritable          | N903S            |                  | ✓               |                 |                 |
| EPC-PAH8   | 37  | M   | Caucasian | 97   | 1.9  | 20.99 | 550          | PGI, PDEI    | idiopathic         |                  | ✓                | ✓               |                 |                 |
| EPC-PAH9   | 62  | F   | Caucasian | 72   | 1.6  | n/a   | 337          | ERA, PDEI    | idiopathic         |                  | ✓                | ✓               |                 |                 |
| EPC-PAH7   | 45  | F   | Caucasian | n/a  | n/a  | n/a   | 388          | ERA, PGI     | idiopathic         |                  | ✓                | ✓               |                 |                 |
| EPC-PAH15  | 24  | F   | Caucasian | n/a  | n/a  | n/a   | 310          | not recorded | idiopathic         |                  |                  | ✓               |                 |                 |
| EPC-PAH17  | 49  | F   | Caucasian | 56   | 1.4  | n/a   | not recorded | none         | idiopathic         |                  |                  | ✓               |                 |                 |

**Suppl.Table 2: List of the miRNAs significantly dysregulated in the PCR array study with unadjusted p-value and correspondent FDR adjusted p-value**

| Column ID       | p-value (IPAH vs. CTR) | FDR adjusted p-value (IPAH vs. CTR) | FoldChange(IPAH vs. CTR) | Column ID        | p-value (FPAH vs. CTR) | FDR adjusted p-value (IPAH vs. CTR) | FoldChange (FPAH vs. CTR) |
|-----------------|------------------------|-------------------------------------|--------------------------|------------------|------------------------|-------------------------------------|---------------------------|
| hsa-miR-148a*   | 0.0008                 | 0.5283                              | 3.55                     | hsa-miR-15a*     | 0.0025                 | 0.8886                              | 1.70                      |
| hsa-miR-451     | 0.0019                 | 0.6505                              | 2.68                     | hsa-miR-3680     | 0.0037                 | 0.8886                              | 1.44                      |
| hsa-miR-193a-3p | 0.0053                 | 0.6881                              | 1.82                     | hsa-miR-33a*     | 0.0046                 | 0.8886                              | -1.40                     |
| hsa-miR-1825    | 0.0053                 | 0.6881                              | -2.58                    | hsa-miR-124      | 0.0056                 | 0.8886                              | -2.78                     |
| hsa-miR-15a*    | 0.0056                 | 0.6881                              | 1.66                     | hsa-miR-3934     | 0.0059                 | 0.8886                              | 2.03                      |
| hsa-miR-124     | 0.0060                 | 0.6881                              | -3.15                    | hsa-miR-375      | 0.0068                 | 0.8886                              | -1.84                     |
| hsa-miR-214     | 0.0086                 | 0.7788                              | 3.46                     | hsa-miR-3139     | 0.0120                 | 0.9988                              | 1.79                      |
| hsa-miR-7       | 0.0108                 | 0.7788                              | -2.24                    | hsa-miR-4279     | 0.0165                 | 0.9988                              | -1.76                     |
| hsa-miR-1827    | 0.0148                 | 0.7788                              | 1.78                     | hsa-miR-3682-3p  | 0.0256                 | 0.9988                              | -2.39                     |
| hsa-miR-302c    | 0.0196                 | 0.7788                              | -2.56                    | hsa-miR-4296     | 0.0273                 | 0.9988                              | 1.60                      |
| hsa-miR-1281    | 0.0200                 | 0.7788                              | -1.69                    | hsa-miR-129*     | 0.0294                 | 0.9988                              | -2.77                     |
| hsa-miR-199b-3p | 0.0207                 | 0.7788                              | 3.42                     | hsa-miR-34c-3p   | 0.0351                 | 0.9988                              | -1.49                     |
| hsa-miR-622     | 0.0210                 | 0.7788                              | -2.77                    | hsa-miR-670      | 0.0388                 | 0.9988                              | 1.54                      |
| hsa-miR-4257    | 0.0220                 | 0.7788                              | -1.75                    | hsa-miR-3194-5p  | 0.0425                 | 0.9988                              | 1.87                      |
| hsa-miR-339-3p  | 0.0233                 | 0.7788                              | 1.41                     | hsa-miR-4330     | 0.0470                 | 0.9988                              | 1.52                      |
| hsa-miR-190b    | 0.0236                 | 0.7788                              | 3.25                     | hsa-miR-196b     | 0.0486                 | 0.9988                              | -2.84                     |
| hsa-miR-4300    | 0.0240                 | 0.7788                              | -2.35                    | hsa-miR-3622a-5p | 0.0490                 | 0.9988                              | 1.24                      |
| hsa-miR-3682-3p | 0.0255                 | 0.7788                              | -2.70                    |                  |                        |                                     |                           |
| hsa-miR-199a-5p | 0.0272                 | 0.7788                              | 3.64                     |                  |                        |                                     |                           |
| hsa-miR-1255a   | 0.0276                 | 0.7788                              | -2.15                    |                  |                        |                                     |                           |
| hsa-miR-632     | 0.0289                 | 0.7788                              | -2.90                    |                  |                        |                                     |                           |
| hsa-miR-660     | 0.0305                 | 0.7788                              | 1.39                     |                  |                        |                                     |                           |
| hsa-miR-4296    | 0.0323                 | 0.7788                              | 1.62                     |                  |                        |                                     |                           |
| hsa-miR-548d-3p | 0.0340                 | 0.7788                              | -2.65                    |                  |                        |                                     |                           |
| hsa-miR-1270    | 0.0344                 | 0.7788                              | -2.17                    |                  |                        |                                     |                           |
| hsa-miR-3200-5p | 0.0369                 | 0.7788                              | -1.61                    |                  |                        |                                     |                           |
| hsa-miR-3913-5p | 0.0372                 | 0.7788                              | 1.59                     |                  |                        |                                     |                           |
| hsa-miR-24-1*   | 0.0383                 | 0.7788                              | 3.53                     |                  |                        |                                     |                           |
| hsa-miR-3156-5p | 0.0387                 | 0.7788                              | 1.98                     |                  |                        |                                     |                           |
| hsa-miR-3907    | 0.0403                 | 0.7788                              | -1.67                    |                  |                        |                                     |                           |
| hsa-miR-148a*   | 0.0421                 | 0.7788                              | 1.59                     |                  |                        |                                     |                           |
| hsa-miR-210     | 0.0466                 | 0.7788                              | 1.40                     |                  |                        |                                     |                           |
| hsa-miR-34a*    | 0.0478                 | 0.7788                              | 1.62                     |                  |                        |                                     |                           |
| hsa-miR-1184    | 0.0495                 | 0.7788                              | -1.75                    |                  |                        |                                     |                           |

**Suppl.Table 3. Partial list of the differently regulated proteins in HPAH identified by iTRAQ\***

| Disregulation in HPAH               | Protein name                                                    | Accession | MS Score | Nominal Mass, Mr | Sig. Peptide Matches, n | H/H  | HPAH/H | p-value |
|-------------------------------------|-----------------------------------------------------------------|-----------|----------|------------------|-------------------------|------|--------|---------|
| <b>Up</b>                           | Endophilin-A2                                                   | Q99961    | 52       | 52295            | 3                       | 1.01 | 1.63   | 0.0321  |
|                                     | EH domain-containing protein 4                                  | Q9H223    | 354      | 74097            | 26                      | 1.02 | 1.31   | 0.0139  |
|                                     | Peroxisomal membrane protein PEX14                              | O75381    | 49       | 47038            | 2                       | 1.05 | 1.30   | 0.0179  |
|                                     | DnaJ homolog subfamily A member 1                               | P31689    | 39       | 56693            | 11                      | 0.96 | 1.28   | 0.0229  |
|                                     | Polypyrimidine tract-binding protein 1                          | P26599    | 64       | 67667            | 4                       | 0.99 | 1.27   | 0.0331  |
|                                     | Splicing factor 3B subunit 3                                    | Q15393    | 48       | 152488           | 2                       | 1.03 | 1.26   | 0.0303  |
|                                     | 10 kDa heat shock protein mitochondrial                         | P61604    | 1196     | 14575            | 74                      | 0.98 | 1.25   | 0.0349  |
|                                     | GTP-binding nuclear protein Ran                                 | P62826    | 267      | 30325            | 10                      | 0.97 | 1.25   | 0.0301  |
|                                     | Threonyl-tRNA synthetase cytoplasmic                            | P26639    | 92       | 102978           | 3                       | 1.01 | 1.25   | 0.0342  |
|                                     | Gamma-enolase                                                   | P09104    | 3690     | 55728            | 182                     | 1.06 | 1.23   | 0.0444  |
| Tyrosyl-tRNA synthetase cytoplasmic | P54577                                                          | 100       | 78243    | 11               | 0.99                    | 1.23 | 0.0455 |         |
| <b>Down</b>                         | LIM and senescent cell antigen-like-containing domain protein 1 | P48059    | 69       | 47870            | 2                       | 1.19 | 0.86   | 0.0273  |
|                                     | Protein disulfide-isomerase A5                                  | Q14554    | 42       | 76885            | 4                       | 1.19 | 0.83   | 0.0463  |
|                                     | Protein S100-A11                                                | P31949    | 1722     | 15171            | 95                      | 0.95 | 0.83   | 0.0333  |
|                                     | Deoxyribonucleoside 5'-monophosphate N-glycosidase              | O43598    | 80       | 19797            | 2                       | 1.04 | 0.80   | 0.0303  |
|                                     | A-kinase anchor protein 13                                      | Q12802    | 27       | 368204           | 2                       | 0.93 | 0.80   | 0.0322  |
|                                     | Lysosomal Pro-X carboxypeptidase                                | P42785    | 64       | 63479            | 4                       | 0.96 | 0.79   | 0.0207  |
|                                     | UDP-N-acetylhexosamine pyrophosphorylase                        | Q16222    | 143      | 70614            | 37                      | 1.09 | 0.76   | 0.0260  |
|                                     | Protein CYR61                                                   | O00622    | 73       | 52872            | 6                       | 1.08 | 0.74   | 0.0059  |
| Uncharacterized protein C1orf167    | Q5SNV9                                                          | 22        | 178763   | 3                | 0.97                    | 0.69 | 0.0018 |         |

\*This is a partial list of protein candidates identified by iTRAQ to be disregulated in HPAH (p-value < 0.05). HPAH vs. H. H indicates healthy and HPAH, hereditary pulmonary arterial hypertension. Accession, Uniprot identifier; MS Score, mass spectrometry score indicating the significance of protein identification from peptide mass fingerprint according to MASCOT software; Nominal Mass, Mr, theoretical molecular weight of the matching protein; Significant Peptide Matches, number of statistically significant peptide matches matching to the protein; H/H and HPAH/H: average of the fold changes for healthy vs healthy channels comparisons, and HPAH vs healthy, respectively (see Methods and supplementary table 1 for all fold values); p-value: p-value associated to HPAH/H fold changes (See Methods).



**Suppl.Table 4. Full list of the differently regulated proteins in HPAH identified by iTRAQ**

| Protein Identity                                                           | Downregulation in HPAH    |                       | Upregulation in HPAH     |                       |
|----------------------------------------------------------------------------|---------------------------|-----------------------|--------------------------|-----------------------|
|                                                                            | "healthy/healthy p-value" | "HPAH/healthy pvalue" | "healthy/healthy pvalue" | "HPAH/healthy pvalue" |
| [Pyruvate dehydrogenase [acetyl-transferring]]-phosphatase 1 mitochondrial | 0.3516                    | 0.1593                | 0.4717                   | 0.9742                |
| 1 4-alpha-glucan-branching enzyme                                          | 0.8851                    | 0.6627                | 0.3088                   | 0.6459                |
| 10 kDa heat shock protein mitochondrial                                    | 0.5353                    | 0.9844                | 0.6763                   | 0.0349                |
| 116 kDa U5 small nuclear ribonucleoprotein component                       | 0.9336                    | 0.8092                | 0.1673                   | 0.4297                |
| 14-3-3 protein beta/alpha                                                  | 0.1484                    | 0.6483                | 0.9665                   | 0.7182                |
| 14-3-3 protein epsilon                                                     | 0.1729                    | 0.6697                | 0.9536                   | 0.6777                |
| 14-3-3 protein gamma                                                       | 0.1155                    | 0.5555                | 0.9763                   | 0.7909                |
| 14-3-3 protein theta                                                       | 0.1024                    | 0.5773                | 0.9791                   | 0.7759                |
| 14-3-3 protein zeta/delta                                                  | 0.1757                    | 0.6670                | 0.9539                   | 0.6895                |
| 182 kDa tankyrase-1-binding protein                                        | 0.8820                    | 0.9677                | 0.1633                   | 0.0917                |
| 2' 3'-cyclic-nucleotide 3'-phosphodiesterase                               | 0.2040                    | 0.4710                | 0.8958                   | 0.8251                |
| 2' 5'-phosphodiesterase 12                                                 | 0.3212                    | 0.7980                | 0.8672                   | 0.2060                |
| 26S protease regulatory subunit 10B                                        | 0.4035                    | 0.6607                | 0.8147                   | 0.6811                |
| 26S protease regulatory subunit 4                                          | 0.6607                    | 0.9473                | 0.5801                   | 0.1976                |
| 26S protease regulatory subunit 6A                                         | 0.1799                    | 0.2918                | 0.9401                   | 0.9210                |
| 26S protease regulatory subunit 6B                                         | 0.2464                    | 0.6529                | 0.8962                   | 0.7262                |
| 26S protease regulatory subunit 7                                          | 0.2537                    | 0.1541                | 0.9150                   | 0.9711                |
| 26S protease regulatory subunit 8                                          | 0.3749                    | 0.5510                | 0.8490                   | 0.7917                |
| 26S proteasome non-ATPase regulatory subunit 1                             | 0.7664                    | 0.8167                | 0.4729                   | 0.5144                |
| 26S proteasome non-ATPase regulatory subunit 11                            | 0.7593                    | 0.7991                | 0.4293                   | 0.4225                |
| 26S proteasome non-ATPase regulatory subunit 12                            | 0.5230                    | 0.5425                | 0.5207                   | 0.7807                |
| 26S proteasome non-ATPase regulatory subunit 2                             | 0.8935                    | 0.7244                | 0.3219                   | 0.6599                |
| 26S proteasome non-ATPase regulatory subunit 4                             | 0.6155                    | 0.9869                | 0.5860                   | 0.1062                |
| 26S proteasome non-ATPase regulatory subunit 5                             | 0.1296                    | 0.3780                | 0.9445                   | 0.7520                |
| 26S proteasome non-ATPase regulatory subunit 6                             | 0.5461                    | 0.8793                | 0.6279                   | 0.3014                |
| 26S proteasome non-ATPase regulatory subunit 7                             | 0.9367                    | 0.9600                | 0.1970                   | 0.1081                |
| 26S proteasome non-ATPase regulatory subunit 9                             | 0.4733                    | 0.7597                | 0.8036                   | 0.6292                |
| 28S ribosomal protein S35 mitochondrial                                    | 0.0001                    | 0.0000                | 1.0000                   | 1.0000                |
| 39S ribosomal protein L1 mitochondrial                                     | 0.2406                    | 0.6216                | 0.9124                   | 0.3934                |
| 39S ribosomal protein L14 mitochondrial                                    | 0.9434                    | 0.9422                | 0.1674                   | 0.1354                |
| 39S ribosomal protein L38 mitochondrial                                    | 0.7047                    | 0.9677                | 0.2325                   | 0.0849                |
| 39S ribosomal protein L4 mitochondrial                                     | 0.7720                    | 0.5408                | 0.4310                   | 0.7116                |
| 39S ribosomal protein L43 mitochondrial                                    | 0.2060                    | 0.5249                | 0.2254                   | 0.4421                |
| 3-hydroxyacyl-CoA dehydrogenase type-2                                     | 0.0140                    | 0.0193                | 0.9925                   | 0.9979                |
| 3-ketoacyl-CoA thiolase mitochondrial                                      | 0.6381                    | 0.0702                | 0.5564                   | 0.9935                |
| 3-ketoacyl-CoA thiolase peroxisomal                                        | 0.6099                    | 0.5530                | 0.5337                   | 0.7826                |
| 3-mercaptopyruvate sulfurtransferase                                       | 0.8309                    | 0.6470                | 0.4309                   | 0.6591                |
| 40S ribosomal protein S10                                                  | 0.1286                    | 0.0258                | 0.9511                   | 0.9889                |
| 40S ribosomal protein S12                                                  | 0.1207                    | 0.4787                | 0.9132                   | 0.6994                |
| 40S ribosomal protein S13                                                  | 1.0000                    | 0.4704                | 0.0004                   | 0.0296                |
| 40S ribosomal protein S14                                                  | 0.9981                    | 0.7745                | 0.0140                   | 0.1668                |
| 40S ribosomal protein S15a                                                 | 0.9997                    | 0.5121                | 0.0027                   | 0.1084                |
| 40S ribosomal protein S16                                                  | 0.8537                    | 0.2051                | 0.3211                   | 0.8633                |
| 40S ribosomal protein S17-like                                             | 0.8339                    | 0.3042                | 0.3175                   | 0.6631                |
| 40S ribosomal protein S18                                                  | 0.9981                    | 0.6794                | 0.0144                   | 0.4202                |
| 40S ribosomal protein S19                                                  | 0.9998                    | 0.7896                | 0.0027                   | 0.1228                |
| 40S ribosomal protein S2                                                   | 0.9359                    | 0.3258                | 0.2056                   | 0.5139                |
| 40S ribosomal protein S20                                                  | 0.6589                    | 0.2416                | 0.5445                   | 0.7875                |
| 40S ribosomal protein S21                                                  | 0.3027                    | 0.7444                | 0.8726                   | 0.4600                |

|                                         |        |        |        |        |
|-----------------------------------------|--------|--------|--------|--------|
| 40S ribosomal protein S23               | 0.9842 | 0.5648 | 0.0441 | 0.2511 |
| 40S ribosomal protein S24               | 0.9553 | 0.9078 | 0.0998 | 0.2975 |
| 40S ribosomal protein S25               | 0.9999 | 0.9974 | 0.0014 | 0.0242 |
| 40S ribosomal protein S27               | 0.9794 | 0.6473 | 0.0929 | 0.3104 |
| 40S ribosomal protein S27-like          | 0.9842 | 0.6039 | 0.0792 | 0.3380 |
| 40S ribosomal protein S28               | 0.9692 | 0.8164 | 0.1058 | 0.4653 |
| 40S ribosomal protein S3                | 0.3729 | 0.3038 | 0.6945 | 0.8847 |
| 40S ribosomal protein S30               | 0.9998 | 0.5783 | 0.0012 | 0.0200 |
| 40S ribosomal protein S3a               | 0.9994 | 0.7044 | 0.0043 | 0.0913 |
| 40S ribosomal protein S4 X isoform      | 0.9998 | 0.6529 | 0.0020 | 0.0318 |
| 40S ribosomal protein S5                | 0.9745 | 0.3835 | 0.0646 | 0.6799 |
| 40S ribosomal protein S6                | 0.9998 | 0.6432 | 0.0012 | 0.0434 |
| 40S ribosomal protein S7                | 0.9882 | 0.5132 | 0.0689 | 0.4966 |
| 40S ribosomal protein S8                | 0.9991 | 0.8192 | 0.0088 | 0.1808 |
| 40S ribosomal protein S9                | 0.9999 | 0.5547 | 0.0010 | 0.0623 |
| 40S ribosomal protein SA                | 0.8223 | 0.7405 | 0.3442 | 0.5584 |
| 60 kDa heat shock protein mitochondrial | 0.5981 | 0.9115 | 0.6178 | 0.1371 |
| 60S acidic ribosomal protein P0         | 0.9184 | 0.2853 | 0.1402 | 0.6164 |
| 60S acidic ribosomal protein P1         | 0.7890 | 0.5560 | 0.3836 | 0.5090 |
| 60S acidic ribosomal protein P2         | 0.9225 | 0.7279 | 0.2443 | 0.4364 |
| 60S ribosomal protein L10               | 0.9963 | 0.3710 | 0.0253 | 0.5201 |
| 60S ribosomal protein L10a              | 0.9996 | 0.8819 | 0.0044 | 0.1847 |
| 60S ribosomal protein L11               | 0.8425 | 0.3369 | 0.3994 | 0.8718 |
| 60S ribosomal protein L12               | 0.9942 | 0.1991 | 0.0293 | 0.5452 |
| 60S ribosomal protein L13               | 0.9999 | 0.4156 | 0.0008 | 0.4010 |
| 60S ribosomal protein L13a              | 0.9971 | 0.6815 | 0.0225 | 0.4100 |
| 60S ribosomal protein L14               | 0.9708 | 0.1613 | 0.0253 | 0.2496 |
| 60S ribosomal protein L15               | 0.9999 | 0.5984 | 0.0017 | 0.2839 |
| 60S ribosomal protein L17               | 0.9285 | 0.5014 | 0.0383 | 0.4542 |
| 60S ribosomal protein L18               | 0.9994 | 0.4849 | 0.0050 | 0.3202 |
| 60S ribosomal protein L18a              | 0.9482 | 0.7553 | 0.1892 | 0.4457 |
| 60S ribosomal protein L19               | 0.9997 | 0.9628 | 0.0017 | 0.0536 |
| 60S ribosomal protein L21               | 0.9940 | 0.4077 | 0.0286 | 0.3863 |
| 60S ribosomal protein L22               | 0.9957 | 0.6324 | 0.0295 | 0.2341 |
| 60S ribosomal protein L22-like 1        | 0.9822 | 0.7962 | 0.0418 | 0.0961 |
| 60S ribosomal protein L23               | 0.9212 | 0.5175 | 0.2448 | 0.4713 |
| 60S ribosomal protein L23a              | 0.9904 | 0.8628 | 0.0366 | 0.1335 |
| 60S ribosomal protein L24               | 0.9970 | 0.6672 | 0.0120 | 0.1448 |
| 60S ribosomal protein L26               | 0.9999 | 0.9002 | 0.0010 | 0.0614 |
| 60S ribosomal protein L27               | 0.9999 | 0.5319 | 0.0009 | 0.1799 |
| 60S ribosomal protein L27a              | 0.9999 | 0.9251 | 0.0020 | 0.1209 |
| 60S ribosomal protein L28               | 1.0000 | 0.5144 | 0.0005 | 0.0827 |
| 60S ribosomal protein L29               | 0.9966 | 0.8854 | 0.0062 | 0.0628 |
| 60S ribosomal protein L3                | 1.0000 | 0.7507 | 0.0004 | 0.0432 |
| 60S ribosomal protein L31               | 0.9999 | 0.7897 | 0.0014 | 0.0479 |
| 60S ribosomal protein L32               | 0.9657 | 0.5612 | 0.0400 | 0.3300 |
| 60S ribosomal protein L34               | 1.0000 | 0.9918 | 0.0002 | 0.0020 |
| 60S ribosomal protein L35               | 0.9999 | 0.8041 | 0.0005 | 0.0222 |
| 60S ribosomal protein L36               | 0.9943 | 0.5992 | 0.0074 | 0.0616 |
| 60S ribosomal protein L38               | 0.3996 | 0.6266 | 0.8157 | 0.6303 |
| 60S ribosomal protein L4                | 0.9985 | 0.6908 | 0.0085 | 0.1468 |
| 60S ribosomal protein L5                | 0.5735 | 0.5385 | 0.7142 | 0.6435 |
| 60S ribosomal protein L6                | 0.9976 | 0.4710 | 0.0052 | 0.1544 |
| 60S ribosomal protein L7                | 1.0000 | 0.6124 | 0.0005 | 0.1210 |
| 60S ribosomal protein L7a               | 0.9994 | 0.6906 | 0.0026 | 0.1449 |
| 60S ribosomal protein L8                | 1.0000 | 0.6366 | 0.0003 | 0.0449 |

|                                                                        |        |        |        |        |
|------------------------------------------------------------------------|--------|--------|--------|--------|
| 60S ribosomal protein L9                                               | 0.9991 | 0.3097 | 0.0086 | 0.1989 |
| 6-phosphofructokinase liver type                                       | 0.3548 | 0.8255 | 0.3651 | 0.4658 |
| 6-phosphofructokinase type C                                           | 0.3163 | 0.6236 | 0.8325 | 0.6232 |
| 6-phosphogluconate dehydrogenase decarboxylating                       | 0.2586 | 0.8678 | 0.7442 | 0.3438 |
| 6-phosphogluconolactonase                                              | 0.2277 | 0.0046 | 0.8889 | 0.9997 |
| 78 kDa glucose-regulated protein                                       | 0.6933 | 0.8426 | 0.5967 | 0.3443 |
| Acetolactate synthase-like protein                                     | 0.2652 | 0.3405 | 0.9139 | 0.9107 |
| Acetyl-CoA acetyltransferase cytosolic                                 | 0.0149 | 0.0217 | 0.9977 | 0.9966 |
| Acetyl-CoA acetyltransferase mitochondrial                             | 0.5222 | 0.2078 | 0.6647 | 0.9446 |
| Acidic leucine-rich nuclear phosphoprotein 32 family member A          | 0.0667 | 0.5539 | 0.8317 | 0.6217 |
| Aconitate hydratase mitochondrial                                      | 0.7767 | 0.9641 | 0.4659 | 0.1806 |
| Actin aortic smooth muscle                                             | 0.5350 | 0.8893 | 0.7435 | 0.3260 |
| Actin cytoplasmic 1                                                    | 0.5236 | 0.8880 | 0.7541 | 0.3316 |
| Actin-binding LIM protein 1                                            | 0.9124 | 0.8233 | 0.2067 | 0.1821 |
| Actin-related protein 2                                                | 0.7424 | 0.8679 | 0.4933 | 0.4372 |
| Actin-related protein 2/3 complex subunit 2                            | 0.5032 | 0.8669 | 0.5284 | 0.3541 |
| Actin-related protein 2/3 complex subunit 3                            | 0.6652 | 0.7114 | 0.5792 | 0.5885 |
| Actin-related protein 2/3 complex subunit 4                            | 0.6122 | 0.9642 | 0.6836 | 0.1832 |
| Actin-related protein 2/3 complex subunit 5                            | 0.3627 | 0.2761 | 0.7004 | 0.8484 |
| Actin-related protein 2/3 complex subunit 5-like protein               | 0.6488 | 0.9272 | 0.3271 | 0.2816 |
| Actin-related protein 3                                                | 0.7746 | 0.6821 | 0.4010 | 0.7111 |
| Activated RNA polymerase II transcriptional coactivator p15            | 0.6483 | 0.6553 | 0.4646 | 0.5732 |
| Activator of 90 kDa heat shock protein ATPase homolog 1                | 0.9949 | 0.9927 | 0.0353 | 0.0264 |
| Acyl-CoA-binding domain-containing protein 6                           | 0.1509 | 0.0526 | 0.8280 | 0.9364 |
| Acyl-CoA-binding protein                                               | 0.2736 | 0.5132 | 0.8835 | 0.4095 |
| Acyl-coenzyme A thioesterase 9 mitochondrial                           | 0.1794 | 0.2288 | 0.9324 | 0.9116 |
| Acyl-protein thioesterase 2                                            | 0.6103 | 0.7897 | 0.5237 | 0.5132 |
| Adapter molecule crk                                                   | 0.9773 | 0.9397 | 0.0807 | 0.2497 |
| Adenine phosphoribosyltransferase                                      | 0.4828 | 0.7765 | 0.7996 | 0.3925 |
| Adenosylhomocysteinase                                                 | 0.2100 | 0.8829 | 0.9145 | 0.1362 |
| Adenylate kinase 2 mitochondrial                                       | 0.4572 | 0.4724 | 0.7627 | 0.8060 |
| Adenylate kinase isoenzyme 1                                           | 0.3717 | 0.2903 | 0.8335 | 0.9323 |
| Adenylosuccinate synthetase isozyme 2                                  | 0.9491 | 0.9679 | 0.1301 | 0.0757 |
| Adenylyl cyclase-associated protein 1                                  | 0.2956 | 0.9269 | 0.8957 | 0.2925 |
| ADP/ATP translocase 2                                                  | 0.4904 | 0.9037 | 0.5945 | 0.2165 |
| ADP/ATP translocase 3                                                  | 0.6333 | 0.9105 | 0.5358 | 0.2220 |
| ADP-ribosylation factor 3                                              | 0.9798 | 0.9744 | 0.0919 | 0.1407 |
| ADP-ribosylation factor-like protein 3                                 | 0.0392 | 0.3760 | 0.9932 | 0.8988 |
| ADP-sugar pyrophosphatase                                              | 0.4934 | 0.1503 | 0.6344 | 0.9801 |
| AFG3-like protein 2                                                    | 0.9572 | 0.9905 | 0.1265 | 0.0772 |
| Aflatoxin B1 aldehyde reductase member 2                               | 0.1625 | 0.1246 | 0.8961 | 0.8487 |
| A-kinase anchor protein 12                                             | 0.0188 | 0.0921 | 0.9966 | 0.9782 |
| A-kinase anchor protein 13                                             | 0.4477 | 0.0322 | 0.8019 | 0.9966 |
| A-kinase anchor protein 17A                                            | 0.9592 | 0.2232 | 0.1232 | 0.9060 |
| A-kinase anchor protein 2                                              | 0.8429 | 0.7995 | 0.3948 | 0.3793 |
| Alanyl-tRNA synthetase cytoplasmic                                     | 0.1532 | 0.6579 | 0.9452 | 0.3252 |
| Alcohol dehydrogenase [NADP+]                                          | 0.5369 | 0.4041 | 0.3413 | 0.6438 |
| Aldehyde dehydrogenase mitochondrial                                   | 0.1660 | 0.0281 | 0.9342 | 0.9386 |
| Alpha-1 3-mannosyl-glycoprotein 2-beta-N-acetylglucosaminyltransferase | 0.1116 | 0.0233 | 0.9759 | 0.9978 |
| Alpha-2-macroglobulin receptor-associated protein                      | 0.8371 | 0.2570 | 0.1413 | 0.9385 |
| Alpha-actinin-1                                                        | 0.2681 | 0.3895 | 0.9201 | 0.8500 |
| Alpha-actinin-4                                                        | 0.3289 | 0.7760 | 0.8805 | 0.5454 |
| Alpha-centractin                                                       | 0.2551 | 0.5232 | 0.9224 | 0.8024 |
| Alpha-endosulfine                                                      | 0.8939 | 0.9531 | 0.2820 | 0.2417 |
| Alpha-enolase                                                          | 0.7776 | 0.9870 | 0.5047 | 0.0880 |
| Alpha-synuclein                                                        | 0.9669 | 0.9973 | 0.0310 | 0.0186 |

|                                                                       |        |        |        |        |
|-----------------------------------------------------------------------|--------|--------|--------|--------|
| Aminoacyl tRNA synthase complex-interacting multifunctional protein 1 | 0.4495 | 0.9656 | 0.7996 | 0.1979 |
| Aminopeptidase B                                                      | 0.9020 | 0.9658 | 0.1836 | 0.1902 |
| Aminopeptidase N                                                      | 0.8088 | 0.7648 | 0.0089 | 0.1706 |
| Amyloid-like protein 2                                                | 0.9058 | 0.4043 | 0.1689 | 0.7582 |
| Anamorsin                                                             | 0.2988 | 0.1307 | 0.6417 | 0.9702 |
| Ankyrin repeat domain-containing protein 33                           | 0.2386 | 0.1382 | 0.9177 | 0.9799 |
| Annexin A1                                                            | 0.5165 | 0.8151 | 0.7508 | 0.5094 |
| Annexin A2                                                            | 0.7928 | 0.8717 | 0.2999 | 0.3567 |
| Annexin A3                                                            | 0.0932 | 0.1703 | 0.8275 | 0.7119 |
| Annexin A4                                                            | 0.4118 | 0.7723 | 0.6915 | 0.3627 |
| Annexin A5                                                            | 0.3355 | 0.6289 | 0.3530 | 0.6399 |
| Annexin A6                                                            | 0.0349 | 0.2376 | 0.8835 | 0.7562 |
| Annexin A7                                                            | 0.7341 | 0.3485 | 0.5036 | 0.9020 |
| AP-1 complex subunit beta-1                                           | 0.0740 | 0.7148 | 0.9868 | 0.2221 |
| AP-2 complex subunit alpha-1                                          | 0.6450 | 0.4699 | 0.6050 | 0.8571 |
| AP-2 complex subunit sigma                                            | 0.3194 | 0.1808 | 0.8323 | 0.9636 |
| AP-3 complex subunit delta-1                                          | 0.7770 | 0.2889 | 0.1458 | 0.9137 |
| Apoptosis regulator BAX                                               | 0.3784 | 0.2738 | 0.6943 | 0.9420 |
| Apoptotic chromatin condensation inducer in the nucleus               | 0.0135 | 0.0449 | 0.9938 | 0.9205 |
| Arginyl-tRNA synthetase cytoplasmic                                   | 0.8206 | 0.6829 | 0.3597 | 0.6417 |
| Asparaginyl-tRNA synthetase cytoplasmic                               | 0.4010 | 0.6968 | 0.8296 | 0.6546 |
| Aspartate aminotransferase mitochondrial                              | 0.7516 | 0.8495 | 0.3932 | 0.4679 |
| Aspartyl/asparaginyl beta-hydroxylase                                 | 0.9749 | 0.1479 | 0.1193 | 0.8539 |
| Aspartyl-tRNA synthetase cytoplasmic                                  | 0.6960 | 0.9072 | 0.4816 | 0.3713 |
| Astrocytic phosphoprotein PEA-15                                      | 0.4947 | 0.2837 | 0.7155 | 0.8782 |
| Ataxin-2                                                              | 0.7758 | 0.8331 | 0.4115 | 0.4839 |
| Ataxin-2-like protein                                                 | 0.3206 | 0.5157 | 0.8503 | 0.8252 |
| ATP synthase subunit alpha mitochondrial                              | 0.8567 | 0.4038 | 0.2478 | 0.6703 |
| ATP synthase subunit b mitochondrial                                  | 0.7605 | 0.4191 | 0.3657 | 0.7950 |
| ATP synthase subunit beta mitochondrial                               | 0.6602 | 0.5207 | 0.5305 | 0.6856 |
| ATP synthase subunit delta mitochondrial                              | 0.9269 | 0.4764 | 0.1572 | 0.2817 |
| ATP synthase subunit gamma mitochondrial                              | 0.5792 | 0.2366 | 0.6672 | 0.8703 |
| ATP synthase subunit O mitochondrial                                  | 0.6101 | 0.2129 | 0.6084 | 0.7930 |
| ATPase ASNA1                                                          | 0.5356 | 0.9440 | 0.7600 | 0.1994 |
| ATPase family AAA domain-containing protein 3A                        | 0.4945 | 0.1547 | 0.6745 | 0.7473 |
| ATP-binding cassette sub-family A member 1                            | 0.7077 | 0.1426 | 0.1116 | 0.2609 |
| ATP-binding cassette sub-family E member 1                            | 0.6152 | 0.9690 | 0.5750 | 0.1047 |
| ATP-citrate synthase                                                  | 0.4911 | 0.8845 | 0.7910 | 0.4053 |
| ATP-dependent DNA helicase Q4                                         | 0.0070 | 0.0019 | 0.9789 | 0.9923 |
| ATP-dependent RNA helicase DDX1                                       | 0.5611 | 0.1855 | 0.5718 | 0.9238 |
| ATP-dependent RNA helicase DDX3X                                      | 0.9892 | 0.8033 | 0.0558 | 0.3479 |
| ATP-dependent zinc metalloprotease YME1L1                             | 0.1378 | 0.5535 | 0.9682 | 0.6110 |
| BAG family molecular chaperone regulator 3                            | 0.9009 | 0.5053 | 0.0669 | 0.8123 |
| Band 4.1-like protein 2                                               | 0.0919 | 0.6191 | 0.7395 | 0.2190 |
| Band 4.1-like protein 3                                               | 0.2300 | 0.0230 | 0.1977 | 0.9968 |
| Basement membrane-specific heparan sulfate proteoglycan core protein  | 0.2444 | 0.0440 | 0.8481 | 0.9960 |
| Basic leucine zipper and W2 domain-containing protein 1               | 0.3876 | 0.5776 | 0.8271 | 0.5245 |
| Basic leucine zipper and W2 domain-containing protein 2               | 0.0396 | 0.2607 | 0.9799 | 0.8795 |
| B-cell receptor-associated protein 31                                 | 0.6725 | 0.8652 | 0.5014 | 0.3494 |
| Bcl-2-associated transcription factor 1                               | 0.8480 | 0.8324 | 0.0787 | 0.3833 |
| BET1 homolog                                                          | 0.0395 | 0.2226 | 0.9820 | 0.9133 |
| Beta-2-microglobulin                                                  | 0.0249 | 0.0303 | 0.9928 | 0.9938 |
| Beta-2-syntrophin                                                     | 0.3791 | 0.1221 | 0.8385 | 0.9660 |
| Beta-catenin-like protein 1                                           | 0.0462 | 0.0292 | 0.9886 | 0.9967 |
| Beta-enolase                                                          | 0.9293 | 0.9913 | 0.2340 | 0.0720 |
| BH3-interacting domain death agonist                                  | 0.0580 | 0.0227 | 0.4460 | 0.9968 |

|                                                                |        |        |        |        |
|----------------------------------------------------------------|--------|--------|--------|--------|
| Bifunctional 3'-phosphoadenosine 5'-phosphosulfate synthase 1  | 0.1326 | 0.0035 | 0.9073 | 0.9999 |
| Bifunctional 3'-phosphoadenosine 5'-phosphosulfate synthase 2  | 0.9915 | 0.9651 | 0.0149 | 0.0581 |
| Bifunctional aminoacyl-tRNA synthetase                         | 0.7533 | 0.9183 | 0.3970 | 0.2965 |
| Bifunctional purine biosynthesis protein PURH                  | 0.5855 | 0.9315 | 0.4007 | 0.2055 |
| Biglycan                                                       | 0.0038 | 0.0017 | 0.9983 | 0.9088 |
| Biliverdin reductase A                                         | 0.3002 | 0.3360 | 0.8551 | 0.8975 |
| BoIA-like protein 2                                            | 0.2598 | 0.0989 | 0.1026 | 0.9524 |
| Breakpoint cluster region protein                              | 0.9075 | 0.8529 | 0.2373 | 0.3508 |
| BTB/POZ domain-containing protein KCTD12                       | 0.9864 | 0.8259 | 0.0358 | 0.1301 |
| C-1-tetrahydrofolate synthase cytoplasmic                      | 0.4365 | 0.6661 | 0.7324 | 0.4425 |
| Cadherin-5                                                     | 0.1598 | 0.4405 | 0.9485 | 0.8112 |
| Calcium-binding mitochondrial carrier protein SCaMC-1          | 0.2901 | 0.2579 | 0.8981 | 0.9331 |
| Calcium-binding protein p22                                    | 0.0905 | 0.5482 | 0.9569 | 0.8002 |
| Calcyclin-binding protein                                      | 0.5865 | 0.7474 | 0.4407 | 0.5601 |
| Caldesmon                                                      | 0.0518 | 0.0233 | 0.9871 | 0.9927 |
| Calmodulin                                                     | 0.2803 | 0.8754 | 0.9095 | 0.3916 |
| Calnexin                                                       | 0.5954 | 0.7532 | 0.6340 | 0.5726 |
| Calpain small subunit 1                                        | 0.7516 | 0.8917 | 0.3425 | 0.3182 |
| Calpain-2 catalytic subunit                                    | 0.9400 | 0.9743 | 0.0600 | 0.1348 |
| Calponin-2                                                     | 0.1203 | 0.3465 | 0.9715 | 0.9165 |
| Calponin-3                                                     | 0.2354 | 0.6239 | 0.9242 | 0.7127 |
| Calreticulin                                                   | 0.1959 | 0.2971 | 0.9502 | 0.7960 |
| Calumenin                                                      | 0.2818 | 0.1523 | 0.7327 | 0.9793 |
| cAMP-dependent protein kinase type I-alpha regulatory subunit  | 0.9188 | 0.9429 | 0.1294 | 0.2695 |
| cAMP-dependent protein kinase type II-alpha regulatory subunit | 0.9595 | 0.9498 | 0.1246 | 0.2533 |
| CAP-Gly domain-containing linker protein 2                     | 0.0532 | NA     | 0.8349 | NA     |
| Carbonyl reductase [NADPH] 1                                   | 0.8637 | 0.9852 | 0.3200 | 0.1107 |
| Carboxypeptidase A6                                            | 0.0707 | 0.0049 | 0.9840 | 0.9998 |
| Carboxypeptidase D                                             | 0.3314 | 0.4479 | 0.8864 | 0.7517 |
| Casein kinase II subunit alpha                                 | 0.3244 | 0.5991 | 0.7461 | 0.6395 |
| Casein kinase II subunit beta                                  | 0.4692 | 0.2214 | 0.6284 | 0.8236 |
| Caspase-4                                                      | 0.4803 | 0.5367 | 0.2958 | 0.5033 |
| Catalase                                                       | 0.9597 | 0.9682 | 0.1435 | 0.0863 |
| Catechol O-methyltransferase                                   | 0.3429 | 0.2918 | 0.8569 | 0.9392 |
| Catenin alpha-1                                                | 0.3649 | 0.5695 | 0.8605 | 0.7845 |
| Catenin alpha-2                                                | 0.7542 | 0.6573 | 0.5156 | 0.7288 |
| Catenin beta-1                                                 | 0.2466 | 0.4273 | 0.8609 | 0.8802 |
| Catenin delta-1                                                | 0.6465 | 0.5558 | 0.5677 | 0.7850 |
| Cathepsin B                                                    | 0.7619 | 0.5793 | 0.3665 | 0.6584 |
| Cathepsin D                                                    | 0.1635 | 0.0782 | 0.9235 | 0.9900 |
| Caveolin-1                                                     | 0.8986 | 0.9988 | 0.1716 | 0.0069 |
| CD166 antigen                                                  | 0.2524 | 0.5460 | 0.6597 | 0.5429 |
| CD44 antigen                                                   | 0.8708 | 0.1955 | 0.1376 | 0.2275 |
| CD59 glycoprotein                                              | 0.8993 | 0.9964 | 0.0400 | 0.0307 |
| CD99 antigen                                                   | 0.0065 | 0.0222 | 0.9979 | 0.9632 |
| Cdc42-interacting protein 4                                    | 0.3090 | 0.7719 | 0.7329 | 0.5398 |
| Cell division control protein 42 homolog                       | 0.2273 | 0.6682 | 0.9274 | 0.7210 |
| Cell surface glycoprotein MUC18                                | 0.2619 | 0.5686 | 0.9024 | 0.6068 |
| Cellular nucleic acid-binding protein                          | 0.3756 | 0.4141 | 0.7555 | 0.5321 |
| Charged multivesicular body protein 1b                         | 0.5487 | 0.6459 | 0.6238 | 0.6961 |
| Charged multivesicular body protein 3                          | 0.0156 | 0.0022 | 0.9969 | 0.9999 |
| Charged multivesicular body protein 4b                         | 0.6131 | 0.8915 | 0.5205 | 0.3895 |
| Chloride intracellular channel protein 1                       | 0.5287 | 0.9839 | 0.6492 | 0.1277 |
| Chloride intracellular channel protein 4                       | 0.2745 | 0.9104 | 0.9120 | 0.3672 |
| Choline transporter-like protein 2                             | 0.6086 | 0.7637 | 0.4701 | 0.2721 |
| Chromobox protein homolog 3                                    | 0.8319 | 0.4162 | 0.2441 | 0.8272 |

|                                                           |        |        |        |        |
|-----------------------------------------------------------|--------|--------|--------|--------|
| Citrate synthase mitochondrial                            | 0.1797 | 0.5620 | 0.9558 | 0.8009 |
| C-Jun-amino-terminal kinase-interacting protein 4         | 0.9608 | 0.7332 | 0.0517 | 0.5173 |
| Clathrin heavy chain 1                                    | 0.6961 | 0.8658 | 0.6108 | 0.4139 |
| Clathrin interactor 1                                     | 0.9738 | 0.9199 | 0.1210 | 0.0988 |
| Clathrin light chain A                                    | 0.6495 | 0.8266 | 0.5805 | 0.5056 |
| Cleavage and polyadenylation specificity factor subunit 5 | 0.5213 | 0.2257 | 0.2754 | 0.6749 |
| Coatomer subunit alpha                                    | 0.0597 | 0.6790 | 0.9573 | 0.5701 |
| Coatomer subunit beta'                                    | 0.1566 | 0.6609 | 0.9615 | 0.5409 |
| Coatomer subunit delta                                    | 0.0613 | 0.0555 | 0.9898 | 0.9878 |
| Coatomer subunit gamma                                    | 0.5617 | 0.2243 | 0.1707 | 0.9386 |
| Cofilin-1                                                 | 0.1270 | 0.7294 | 0.9570 | 0.6105 |
| Cofilin-2                                                 | 0.1293 | 0.6260 | 0.9605 | 0.7389 |
| Coiled-coil domain-containing protein 124                 | 0.8593 | 0.7666 | 0.1001 | 0.5092 |
| Coiled-coil domain-containing protein 47                  | 0.9936 | 0.9129 | 0.0202 | 0.3213 |
| Coiled-coil domain-containing protein 50                  | 0.0553 | 0.5499 | 0.9907 | 0.7569 |
| Coiled-coil domain-containing protein 51                  | 0.5636 | 0.1081 | 0.2657 | 0.9369 |
| Coiled-coil domain-containing protein 93                  | 0.8537 | 0.4049 | 0.2451 | 0.7207 |
| Cold shock domain-containing protein E1                   | 0.2163 | 0.0546 | 0.9402 | 0.9939 |
| Collagen alpha-1(VI) chain                                | 0.0805 | 0.0387 | 0.7025 | 0.8519 |
| Constitutive coactivator of PPAR-gamma-like protein 1     | 0.9810 | 0.9706 | 0.0537 | 0.1107 |
| COP9 signalosome complex subunit 8                        | 0.6946 | 0.3155 | 0.6079 | 0.9285 |
| Copine-1                                                  | 0.9909 | 0.9938 | 0.0086 | 0.0586 |
| Copine-2                                                  | 0.0266 | 0.0000 | 0.9907 | 1.0000 |
| Coronin-1C                                                | 0.4718 | 0.9082 | 0.3638 | 0.2418 |
| CTP synthase 1                                            | 0.7712 | 0.3258 | 0.3016 | 0.9277 |
| Cullin-4B                                                 | 0.3734 | 0.7032 | 0.8410 | 0.6696 |
| Cullin-associated NEDD8-dissociated protein 1             | 0.3704 | 0.6387 | 0.8418 | 0.5424 |
| Cyclin-dependent kinase 1                                 | 0.3573 | 0.3463 | 0.7413 | 0.8358 |
| Cyclin-dependent kinase 17                                | 0.3756 | 0.3267 | 0.7652 | 0.8549 |
| Cystatin-B                                                | 0.0030 | 0.0395 | 0.9997 | 0.9255 |
| Cysteine and glycine-rich protein 1                       | 0.0673 | 0.1193 | 0.9752 | 0.9381 |
| Cysteine-rich protein 2                                   | 0.3870 | 0.3430 | 0.8512 | 0.8656 |
| Cytochrome b-c1 complex subunit 1 mitochondrial           | 0.4329 | 0.8810 | 0.8308 | 0.3968 |
| Cytochrome b-c1 complex subunit 2 mitochondrial           | 0.6397 | 0.3853 | 0.1911 | 0.8988 |
| Cytochrome b-c1 complex subunit 6 mitochondrial           | 0.7985 | 0.8170 | 0.1925 | 0.4613 |
| Cytochrome b-c1 complex subunit 7                         | 0.9639 | 0.5673 | 0.1408 | 0.6697 |
| Cytochrome c                                              | 0.0190 | 0.1569 | 0.9947 | 0.9654 |
| Cytochrome c oxidase subunit 2                            | 0.0249 | 0.0204 | 0.9844 | 0.9986 |
| Cytochrome c oxidase subunit 4 isoform 1 mitochondrial    | 0.6530 | 0.9579 | 0.5376 | 0.2342 |
| Cytochrome c oxidase subunit 5A mitochondrial             | 0.8128 | 0.8869 | 0.2934 | 0.4127 |
| Cytochrome c oxidase subunit 5B mitochondrial             | 0.6183 | 0.9731 | 0.0644 | 0.1659 |
| Cytochrome c oxidase subunit 6C                           | 0.7698 | 0.5744 | 0.3733 | 0.6113 |
| Cytoplasmic aconitase hydratase                           | 0.3104 | 0.5980 | 0.8991 | 0.6144 |
| Cytoplasmic dynein 1 heavy chain 1                        | 0.5567 | 0.6432 | 0.6733 | 0.7182 |
| Cytoplasmic dynein 1 intermediate chain 2                 | 0.7747 | 0.5099 | 0.4228 | 0.7939 |
| Cytoplasmic dynein 1 light intermediate chain 1           | 0.7016 | 0.8168 | 0.5996 | 0.5208 |
| Cytoplasmic dynein 1 light intermediate chain 2           | 0.6466 | 0.2093 | 0.6586 | 0.9284 |
| Cytoplasmic FMR1-interacting protein 1                    | 0.9049 | 0.9805 | 0.2743 | 0.1189 |
| Cytoskeleton-associated protein 4                         | 0.4593 | 0.0837 | 0.5194 | 0.8504 |
| Cytosol aminopeptidase                                    | 0.0946 | 0.4343 | 0.9532 | 0.7593 |
| Cytosolic acyl coenzyme A thioester hydrolase             | 0.0416 | 0.1202 | 0.9929 | 0.8912 |
| Cytosolic non-specific dipeptidase                        | 0.4588 | 0.6433 | 0.5309 | 0.6037 |
| DAZ-associated protein 1                                  | 0.9436 | 0.6210 | 0.1826 | 0.7045 |
| dCTP pyrophosphatase 1                                    | 0.1515 | 0.8104 | 0.7546 | 0.1454 |
| D-dopachrome decarboxylase                                | 0.2727 | 0.2389 | 0.7891 | 0.8991 |
| Death-associated protein kinase 1                         | 0.0572 | 0.1086 | 0.9898 | 0.6921 |

|                                                                                                                |        |        |        |        |
|----------------------------------------------------------------------------------------------------------------|--------|--------|--------|--------|
| Dedicator of cytokinesis protein 3                                                                             | 0.8609 | 0.7850 | 0.1338 | 0.4486 |
| Dedicator of cytokinesis protein 4                                                                             | 0.1026 | 0.3682 | 0.9797 | 0.8374 |
| Delta-1-pyrroline-5-carboxylate synthase                                                                       | 0.5496 | 0.3686 | 0.4967 | 0.8994 |
| DENN domain-containing protein 4B                                                                              | 0.0013 | 0.0002 | 0.9999 | 1.0000 |
| Deoxyribonucleoside 5'-monophosphate N-glycosidase                                                             | 0.7541 | 0.0303 | 0.5019 | 0.9952 |
| Deoxyuridine 5'-triphosphate nucleotidohydrolase mitochondrial                                                 | 0.0912 | 0.5333 | 0.8645 | 0.3821 |
| Destrin                                                                                                        | 0.1056 | 0.5211 | 0.9638 | 0.7954 |
| Dihydropolyl dehydrogenase mitochondrial                                                                       | 0.7926 | 0.9457 | 0.3623 | 0.2742 |
| Dihydropolyllysine-residue acetyltransferase component of pyruvate dehydrogenase complex mitochondrial         | 0.2635 | 0.3462 | 0.8506 | 0.8902 |
| Dihydropolyllysine-residue succinyltransferase component of 2-oxoglutarate dehydrogenase complex mitochondrial | 0.7299 | 0.4839 | 0.5068 | 0.7873 |
| Dihydropyrimidinase-related protein 2                                                                          | 0.2339 | 0.0120 | 0.8016 | 0.9639 |
| Dihydropyrimidinase-related protein 3                                                                          | 0.2478 | 0.1470 | 0.8907 | 0.9595 |
| Dipeptidyl peptidase 2                                                                                         | 0.4436 | 0.1306 | 0.4985 | 0.9575 |
| Disabled homolog 2                                                                                             | 0.4566 | 0.0798 | 0.7286 | 0.9888 |
| Disintegrin and metalloproteinase domain-containing protein 17                                                 | 0.3145 | 0.2457 | 0.8559 | 0.9434 |
| DNA fragmentation factor subunit alpha                                                                         | 0.9252 | 0.9873 | 0.2454 | 0.1006 |
| DNA repair protein XRCC1                                                                                       | 0.4068 | 0.0812 | 0.7857 | 0.9805 |
| DNA replication licensing factor MCM2                                                                          | 0.9785 | 0.9926 | 0.0530 | 0.0120 |
| DNA replication licensing factor MCM3                                                                          | 0.9365 | 0.9942 | 0.0626 | 0.0263 |
| DNA replication licensing factor MCM7                                                                          | 0.9832 | 0.9950 | 0.0627 | 0.0545 |
| DNA-(apurinic or apyrimidinic site) lyase                                                                      | 0.8136 | 0.7366 | 0.4076 | 0.5277 |
| DNA-binding protein A                                                                                          | 0.8907 | 0.9710 | 0.1728 | 0.1644 |
| DNA-dependent protein kinase catalytic subunit                                                                 | 0.6716 | 0.8529 | 0.5613 | 0.4289 |
| DNA-directed RNA polymerase II subunit RPB2                                                                    | 0.9557 | 0.9814 | 0.0248 | 0.0423 |
| DNA-directed RNA polymerases I II and III subunit RPABC5                                                       | 0.9062 | 0.8336 | 0.1075 | 0.4718 |
| DnaJ homolog subfamily A member 1                                                                              | 0.4185 | 0.9967 | 0.6875 | 0.0229 |
| DnaJ homolog subfamily A member 2                                                                              | 0.4239 | 0.5686 | 0.7541 | 0.5591 |
| DnaJ homolog subfamily B member 1                                                                              | 0.9424 | 0.5272 | 0.2014 | 0.8245 |
| DnaJ homolog subfamily B member 4                                                                              | 0.9270 | 0.9498 | 0.1653 | 0.1812 |
| DnaJ homolog subfamily C member 11                                                                             | 0.9987 | 0.9984 | 0.0100 | 0.0196 |
| DnaJ homolog subfamily C member 2                                                                              | 0.8903 | 0.6387 | 0.1646 | 0.7502 |
| DnaJ homolog subfamily C member 3                                                                              | 0.8269 | 0.6276 | 0.1447 | 0.5472 |
| Dolichyl-diphosphooligosaccharide--protein glycosyltransferase 48 kDa subunit                                  | 0.5205 | 0.6746 | 0.5929 | 0.6511 |
| Dolichyl-diphosphooligosaccharide--protein glycosyltransferase subunit 1                                       | 0.4034 | 0.5516 | 0.8238 | 0.8076 |
| Dolichyl-diphosphooligosaccharide--protein glycosyltransferase subunit STT3B                                   | 0.7593 | 0.6077 | 0.0917 | 0.2111 |
| Double-stranded RNA-specific adenosine deaminase                                                               | 0.1733 | 0.0692 | 0.8647 | 0.7302 |
| Drebrin                                                                                                        | 0.9736 | 0.9934 | 0.0938 | 0.0678 |
| Drebrin-like protein                                                                                           | 0.3090 | 0.1126 | 0.6809 | 0.9823 |
| Dual specificity mitogen-activated protein kinase kinase 1                                                     | 0.4563 | 0.8053 | 0.7353 | 0.5302 |
| Dual specificity protein phosphatase 3                                                                         | 0.6891 | 0.3764 | 0.4440 | 0.8455 |
| Dynactin subunit 1                                                                                             | 0.2927 | 0.8899 | 0.9070 | 0.3107 |
| Dynactin subunit 2                                                                                             | 0.0150 | 0.0049 | 0.9978 | 0.9998 |
| Dynactin subunit 6                                                                                             | 0.3160 | 0.8142 | 0.8354 | 0.4729 |
| Dynamamin-1-like protein                                                                                       | 0.7430 | 0.9662 | 0.5007 | 0.1857 |
| Dynamamin-2                                                                                                    | 0.4902 | 0.6733 | 0.5955 | 0.5659 |
| Dynein heavy chain 17 axonemal                                                                                 | 0.6880 | 0.7101 | 0.5329 | 0.4975 |
| Dysferlin                                                                                                      | 0.8391 | 0.9627 | 0.3588 | 0.2125 |
| Dystroglycan                                                                                                   | 0.9570 | 0.3711 | 0.1722 | 0.8901 |
| E3 ubiquitin-protein ligase CHIP                                                                               | 0.0903 | 0.0026 | 0.9469 | 0.9998 |
| E3 ubiquitin-protein ligase HUWE1                                                                              | 0.9894 | 0.9475 | 0.0536 | 0.2560 |
| Early endosome antigen 1                                                                                       | 0.2642 | 0.3643 | 0.6765 | 0.8450 |
| EF-hand domain-containing protein D2                                                                           | 0.0403 | 0.1332 | 0.9431 | 0.9818 |
| EGF-containing fibulin-like extracellular matrix protein 1                                                     | 0.2219 | 0.0257 | 0.6534 | 0.7105 |
| EH domain-containing protein 1                                                                                 | 0.9638 | 0.9958 | 0.1435 | 0.0405 |
| EH domain-containing protein 2                                                                                 | 0.7269 | 0.9081 | 0.5305 | 0.3315 |
| EH domain-containing protein 3                                                                                 | 0.8525 | 0.9784 | 0.3672 | 0.1236 |

|                                                                   |        |        |        |        |
|-------------------------------------------------------------------|--------|--------|--------|--------|
| EH domain-containing protein 4                                    | 0.6306 | 0.9993 | 0.5081 | 0.0139 |
| Electron transfer flavoprotein subunit alpha mitochondrial        | 0.0290 | 0.5411 | 0.9344 | 0.8024 |
| Electron transfer flavoprotein subunit beta                       | 0.8467 | 0.7457 | 0.2076 | 0.4932 |
| ELKS/Rab6-interacting/CAST family member 1                        | 0.6457 | 0.3839 | 0.4916 | 0.8874 |
| Elongation factor 1-beta                                          | 0.2931 | 0.7912 | 0.8771 | 0.5506 |
| Elongation factor 1-delta                                         | 0.4476 | 0.4726 | 0.7963 | 0.8407 |
| Elongation factor 1-gamma                                         | 0.6894 | 0.7381 | 0.5842 | 0.4304 |
| Elongation factor 2                                               | 0.5218 | 0.7198 | 0.7661 | 0.5789 |
| Elongation factor Tu mitochondrial                                | 0.7144 | 0.7745 | 0.5315 | 0.4318 |
| Endoglin                                                          | 0.0074 | 0.0210 | 0.9967 | 0.9767 |
| Endophilin-A2                                                     | 0.4959 | 0.4287 | 0.5133 | 0.0321 |
| Endophilin-B1                                                     | 0.5574 | 0.6923 | 0.6443 | 0.5621 |
| Endoplasmic reticulum resident protein 29                         | 0.1751 | 0.6996 | 0.9494 | 0.3805 |
| Endoplasmic reticulum resident protein 44                         | 0.9065 | 0.8449 | 0.2822 | 0.4148 |
| Endoplasmin                                                       | 0.9306 | 0.8702 | 0.2233 | 0.2688 |
| Endothelial differentiation-related factor 1                      | 0.2366 | 0.7443 | 0.9288 | 0.3638 |
| Endothelin-converting enzyme 1                                    | 0.6509 | 0.7870 | 0.5316 | 0.3509 |
| Enhancer of rudimentary homolog                                   | 0.4999 | 0.8321 | 0.7070 | 0.3357 |
| Enoyl-CoA hydratase mitochondrial                                 | 0.3273 | 0.0968 | 0.4838 | 0.9897 |
| Epididymal secretory protein E1                                   | 0.0005 | 0.1034 | 0.9998 | 0.7991 |
| ERO1-like protein alpha                                           | 0.2710 | 0.5183 | 0.9147 | 0.5842 |
| Erythrocyte band 7 integral membrane protein                      | 0.6198 | 0.9347 | 0.4544 | 0.2198 |
| ES1 protein homolog mitochondrial                                 | 0.8288 | 0.8604 | 0.3839 | 0.4170 |
| Ester hydrolase C11orf54                                          | 0.5784 | 0.1397 | 0.6987 | 0.8534 |
| Estradiol 17-beta-dehydrogenase 12                                | 0.9579 | 0.4679 | 0.0978 | 0.4582 |
| Eukaryotic initiation factor 4A-I                                 | 0.7943 | 0.9097 | 0.4398 | 0.2057 |
| Eukaryotic initiation factor 4A-II                                | 0.8379 | 0.9238 | 0.3926 | 0.1651 |
| Eukaryotic initiation factor 4A-III                               | 0.3165 | 0.7213 | 0.8828 | 0.5675 |
| Eukaryotic peptide chain release factor GTP-binding subunit ERF3A | 0.3399 | 0.7483 | 0.8860 | 0.2927 |
| Eukaryotic translation initiation factor 1A X-chromosomal         | 0.8772 | 0.9904 | 0.2129 | 0.0494 |
| Eukaryotic translation initiation factor 2 subunit 1              | 0.9595 | 0.8585 | 0.1319 | 0.3465 |
| Eukaryotic translation initiation factor 3 subunit A              | 0.7479 | 0.5537 | 0.5437 | 0.7107 |
| Eukaryotic translation initiation factor 3 subunit B              | 0.8033 | 0.6919 | 0.2531 | 0.5388 |
| Eukaryotic translation initiation factor 3 subunit C              | 0.5010 | 0.5129 | 0.6414 | 0.7447 |
| Eukaryotic translation initiation factor 3 subunit F              | 0.8255 | 0.6471 | 0.3666 | 0.6498 |
| Eukaryotic translation initiation factor 3 subunit I              | 0.4191 | 0.0948 | 0.8293 | 0.9809 |
| Eukaryotic translation initiation factor 3 subunit J              | 0.4730 | 0.7592 | 0.5593 | 0.5196 |
| Eukaryotic translation initiation factor 4 gamma 1                | 0.3150 | 0.5307 | 0.7605 | 0.7833 |
| Eukaryotic translation initiation factor 4B                       | 0.8631 | 0.9138 | 0.2462 | 0.1881 |
| Eukaryotic translation initiation factor 4H                       | 0.9364 | 0.9590 | 0.2137 | 0.1680 |
| Eukaryotic translation initiation factor 5                        | 0.1879 | 0.3356 | 0.9385 | 0.7340 |
| Eukaryotic translation initiation factor 5A-1                     | 0.2403 | 0.9036 | 0.9071 | 0.1855 |
| Eukaryotic translation initiation factor 5B                       | 0.6782 | 0.6459 | 0.4799 | 0.5991 |
| Exostosin-like 2                                                  | 0.9512 | 0.9465 | 0.1525 | 0.2131 |
| Exportin-1                                                        | 0.5434 | 0.5497 | 0.3601 | 0.6586 |
| Exportin-2                                                        | 0.2992 | 0.7841 | 0.8625 | 0.2679 |
| Exportin-4                                                        | 0.0253 | 0.3298 | 0.9561 | 0.8261 |
| Extended synaptotagmin-1                                          | 0.2449 | 0.4160 | 0.8956 | 0.8205 |
| Ezrin                                                             | 0.3762 | 0.6383 | 0.8526 | 0.5995 |
| F-actin-capping protein subunit alpha-1                           | 0.4675 | 0.5008 | 0.7384 | 0.8209 |
| F-actin-capping protein subunit beta                              | 0.1598 | 0.8082 | 0.9603 | 0.5361 |
| Far upstream element-binding protein 1                            | 0.6963 | 0.6906 | 0.4639 | 0.5359 |
| Far upstream element-binding protein 2                            | 0.7264 | 0.7874 | 0.4141 | 0.4317 |
| Far upstream element-binding protein 3                            | 0.6948 | 0.7256 | 0.5784 | 0.5498 |
| Farnesyl pyrophosphate synthase                                   | 0.1194 | 0.3010 | 0.9577 | 0.8617 |
| Fascin                                                            | 0.3477 | 0.7450 | 0.8621 | 0.5552 |



|                                                                    |        |        |        |        |
|--------------------------------------------------------------------|--------|--------|--------|--------|
| Fatty acid desaturase 3                                            | 0.1366 | 0.0340 | 0.9483 | 0.9947 |
| Fatty acid synthase                                                | 0.8422 | 0.9270 | 0.3538 | 0.3028 |
| Fatty acid-binding protein epidermal                               | 0.5857 | 0.9410 | 0.0052 | 0.0441 |
| Ferritin heavy chain                                               | 0.0002 | 0.0349 | 1.0000 | 0.9870 |
| FH1/FH2 domain-containing protein 1                                | 0.3921 | 0.7994 | 0.2294 | 0.4224 |
| Fibrillin-1                                                        | 0.8553 | 0.5090 | 0.2614 | 0.6664 |
| Fibrocystin                                                        | 0.9619 | 0.9567 | 0.1014 | 0.2141 |
| Fibronectin                                                        | 0.8421 | 0.1522 | 0.3854 | 0.5691 |
| Filamin-A                                                          | 0.1724 | 0.3471 | 0.9487 | 0.9093 |
| Filamin-B                                                          | 0.1621 | 0.2913 | 0.9362 | 0.9363 |
| Filamin-binding LIM protein 1                                      | 0.9744 | 0.9409 | 0.0826 | 0.2118 |
| Filamin-C                                                          | 0.9612 | 0.8703 | 0.1481 | 0.3699 |
| Flavin reductase                                                   | 0.2876 | 0.1673 | 0.8816 | 0.9239 |
| Flotillin-2                                                        | 0.8633 | 0.4584 | 0.0574 | 0.7872 |
| Fructose-bisphosphate aldolase A                                   | 0.6266 | 0.8919 | 0.4751 | 0.2638 |
| Fumarate hydratase mitochondrial                                   | 0.4452 | 0.7109 | 0.5386 | 0.6404 |
| Fumarylacetoacetate hydrolase domain-containing protein 1          | 0.6591 | 0.6517 | 0.3976 | 0.5891 |
| Fumarylacetoacetate hydrolase domain-containing protein 2A         | 0.6050 | 0.2354 | 0.4900 | 0.9589 |
| FYVE RhoGEF and PH domain-containing protein 5                     | 0.7601 | 0.8005 | 0.3242 | 0.5739 |
| Galectin-1                                                         | 0.2212 | 0.3199 | 0.8826 | 0.7194 |
| Galectin-3                                                         | 0.1212 | 0.3897 | 0.9305 | 0.5730 |
| Gamma-enolase                                                      | 0.8393 | 0.9932 | 0.4147 | 0.0444 |
| Gamma-interferon-inducible protein 16                              | 0.6461 | 0.5211 | 0.5278 | 0.5301 |
| Gap junction alpha-1 protein                                       | 0.0133 | 0.0158 | 0.9974 | 0.9987 |
| Gelsolin                                                           | 0.0089 | 0.0216 | 0.9987 | 0.9297 |
| General vesicular transport factor p115                            | 0.7368 | 0.6731 | 0.5573 | 0.4246 |
| Glucose-6-phosphate 1-dehydrogenase                                | 0.2584 | 0.3573 | 0.8939 | 0.9122 |
| Glucose-6-phosphate isomerase                                      | 0.9250 | 0.9278 | 0.2234 | 0.2634 |
| Glucosidase 2 subunit beta                                         | 0.2694 | 0.3100 | 0.9051 | 0.8965 |
| Glutamate dehydrogenase 1 mitochondrial                            | 0.9622 | 0.9131 | 0.1006 | 0.2912 |
| Glutaminase kidney isoform mitochondrial                           | 0.7455 | 0.9930 | 0.2685 | 0.0113 |
| Glutaminyl-tRNA synthetase                                         | 0.4487 | 0.7400 | 0.8143 | 0.6258 |
| Glutaredoxin-3                                                     | 0.3071 | 0.7852 | 0.8888 | 0.4097 |
| Glutathione peroxidase 1                                           | 0.2392 | 0.3926 | 0.6883 | 0.7549 |
| Glutathione S-transferase kappa 1                                  | 0.5420 | 0.8190 | 0.5453 | 0.3686 |
| Glutathione S-transferase omega-1                                  | 0.0234 | 0.8001 | 0.4396 | 0.4691 |
| Glutathione S-transferase P                                        | 0.3284 | 0.3854 | 0.8122 | 0.8730 |
| Glutathione synthetase                                             | 0.0596 | 0.0182 | 0.9865 | 0.9990 |
| Glyceraldehyde-3-phosphate dehydrogenase                           | 0.6506 | 0.8901 | 0.6546 | 0.1913 |
| Glycogen phosphorylase brain form                                  | 0.4061 | 0.6504 | 0.5763 | 0.6462 |
| Glycogen phosphorylase liver form                                  | 0.9983 | 0.8740 | 0.0077 | 0.1085 |
| Glycylpeptide N-tetradecanoyltransferase 1                         | 0.0247 | 0.0107 | 0.9882 | 0.9995 |
| Glycyl-tRNA synthetase                                             | 0.6142 | 0.9615 | 0.6830 | 0.1553 |
| Glyoxalase domain-containing protein 4                             | 0.3313 | 0.3525 | 0.8322 | 0.9170 |
| Glyoxylate reductase/hydroxypyruvate reductase                     | 0.0027 | 0.0007 | 0.9997 | 1.0000 |
| Golgin subfamily A member 2                                        | 0.2046 | 0.6040 | 0.8287 | 0.7234 |
| Golgin subfamily A member 3                                        | 0.1834 | 0.1724 | 0.7973 | 0.9623 |
| Golgin subfamily B member 1                                        | 0.1138 | 0.1182 | 0.9703 | 0.9550 |
| GTP:AMP phosphotransferase mitochondrial                           | 0.8339 | 0.9746 | 0.0182 | 0.1201 |
| GTPase IMAP family member 4                                        | 0.5950 | 0.8978 | 0.2587 | 0.0568 |
| GTPase IMAP family member 8                                        | 0.3998 | 0.9156 | 0.5743 | 0.3321 |
| GTP-binding nuclear protein Ran                                    | 0.4177 | 0.8984 | 0.6821 | 0.0301 |
| GTP-binding protein SAR1a                                          | 0.0199 | 0.1472 | 0.9971 | 0.9579 |
| Guanine nucleotide-binding protein G(i) subunit alpha-1            | 0.1069 | 0.3131 | 0.9532 | 0.8992 |
| Guanine nucleotide-binding protein G(l)/G(s)/G(o) subunit gamma-12 | 0.4906 | 0.3957 | 0.2092 | 0.7899 |
| Guanine nucleotide-binding protein G(l)/G(s)/G(t) subunit beta-2   | 0.7830 | 0.9572 | 0.3501 | 0.2317 |

|                                                                      |        |        |        |        |
|----------------------------------------------------------------------|--------|--------|--------|--------|
| Guanine nucleotide-binding protein G(s) subunit alpha isoforms short | 0.0304 | 0.0291 | 0.9903 | 0.9971 |
| Guanine nucleotide-binding protein subunit alpha-13                  | 0.0812 | 0.1553 | 0.9748 | 0.9724 |
| Guanine nucleotide-binding protein subunit beta-2-like 1             | 0.3020 | 0.7096 | 0.8710 | 0.4464 |
| Heat shock 70 kDa protein 1A/1B                                      | 0.7932 | 0.9731 | 0.2952 | 0.0990 |
| Heat shock 70 kDa protein 4                                          | 0.8041 | 0.7998 | 0.2498 | 0.3702 |
| Heat shock cognate 71 kDa protein                                    | 0.6424 | 0.9136 | 0.5895 | 0.2925 |
| Heat shock protein 105 kDa                                           | 0.9621 | 0.9829 | 0.0623 | 0.0852 |
| Heat shock protein beta-1                                            | 0.0155 | 0.2445 | 0.9948 | 0.9201 |
| Heat shock protein beta-6                                            | 0.9999 | 0.9999 | 0.0003 | 0.0004 |
| Heat shock protein HSP 90-alpha                                      | 0.3431 | 0.8733 | 0.8587 | 0.2349 |
| Heat shock protein HSP 90-beta                                       | 0.4081 | 0.8419 | 0.8081 | 0.2952 |
| Hedgehog-interacting protein                                         | 0.0476 | 0.0025 | 0.9312 | 0.9999 |
| Hematological and neurological expressed 1 protein                   | 0.3798 | 0.9349 | 0.7694 | 0.2591 |
| Hematopoietic lineage cell-specific protein                          | 0.0186 | 0.0606 | 0.9131 | 0.8256 |
| Heme oxygenase 1                                                     | 0.3551 | 0.8534 | 0.1104 | 0.0598 |
| Heme oxygenase 2                                                     | 0.7221 | 0.7931 | 0.5585 | 0.5586 |
| Heme-binding protein 2                                               | 0.0009 | 0.0037 | 0.9999 | 0.9998 |
| Hepatitis B virus X-interacting protein                              | 0.1462 | 0.9033 | 0.9603 | 0.3572 |
| Hepatoma-derived growth factor                                       | 0.0689 | 0.4475 | 0.9764 | 0.4932 |
| Heterogeneous nuclear ribonucleoprotein A/B                          | 0.6521 | 0.7318 | 0.4965 | 0.4084 |
| Heterogeneous nuclear ribonucleoprotein A1                           | 0.9913 | 0.9676 | 0.0483 | 0.1220 |
| Heterogeneous nuclear ribonucleoprotein A3                           | 0.9777 | 0.8854 | 0.1022 | 0.3299 |
| Heterogeneous nuclear ribonucleoprotein D0                           | 0.1598 | 0.0764 | 0.9307 | 0.9828 |
| Heterogeneous nuclear ribonucleoprotein F                            | 0.6797 | 0.6068 | 0.5384 | 0.6883 |
| Heterogeneous nuclear ribonucleoprotein H                            | 0.6783 | 0.6934 | 0.5580 | 0.5777 |
| Heterogeneous nuclear ribonucleoprotein H2                           | 0.6089 | 0.6800 | 0.6504 | 0.6005 |
| Heterogeneous nuclear ribonucleoprotein H3                           | 0.7939 | 0.8667 | 0.0626 | 0.3295 |
| Heterogeneous nuclear ribonucleoprotein K                            | 0.4498 | 0.8230 | 0.7032 | 0.2502 |
| Heterogeneous nuclear ribonucleoprotein L                            | 0.6862 | 0.1040 | 0.4677 | 0.6518 |
| Heterogeneous nuclear ribonucleoprotein M                            | 0.9536 | 0.3103 | 0.0931 | 0.6193 |
| Heterogeneous nuclear ribonucleoprotein Q                            | 0.9537 | 0.9187 | 0.1618 | 0.1570 |
| Heterogeneous nuclear ribonucleoprotein R                            | 0.9262 | 0.7947 | 0.2296 | 0.2089 |
| Heterogeneous nuclear ribonucleoprotein U                            | 0.9675 | 0.9703 | 0.0771 | 0.1383 |
| Heterogeneous nuclear ribonucleoprotein U-like protein 1             | 0.8696 | 0.4287 | 0.0424 | 0.8015 |
| Heterogeneous nuclear ribonucleoprotein U-like protein 2             | 0.4735 | 0.7908 | 0.6659 | 0.4843 |
| Heterogeneous nuclear ribonucleoproteins A2/B1                       | 0.9953 | 0.9147 | 0.0290 | 0.2692 |
| Heterogeneous nuclear ribonucleoproteins C1/C2                       | 0.9842 | 0.9193 | 0.0837 | 0.2853 |
| Hexokinase-1                                                         | 0.7105 | 0.5749 | 0.4837 | 0.6516 |
| High mobility group protein B1                                       | 0.0118 | 0.2944 | 0.9935 | 0.3730 |
| High mobility group protein B2                                       | 0.0105 | 0.2933 | 0.9924 | 0.3294 |
| High mobility group protein HMG-I/HMG-Y                              | 0.9998 | 0.9143 | 0.0006 | 0.0072 |
| Hippocalcin-like protein 1                                           | 0.5582 | 0.3732 | 0.5928 | 0.8942 |
| Histidine triad nucleotide-binding protein 1                         | 0.9716 | 0.9658 | 0.0897 | 0.1928 |
| Histidine triad nucleotide-binding protein 2 mitochondrial           | 0.2108 | 0.4134 | 0.8923 | 0.8152 |
| Histidyl-tRNA synthetase cytoplasmic                                 | 0.4729 | 0.4584 | 0.6437 | 0.8456 |
| Histone deacetylase complex subunit SAP18                            | 0.9957 | 0.9983 | 0.0165 | 0.0122 |
| Histone H1.3                                                         | 0.9946 | 0.2965 | 0.0162 | 0.0848 |
| Histone H1.5                                                         | 0.9958 | 0.3305 | 0.0148 | 0.1089 |
| Histone H2A type 1-C                                                 | 1.0000 | 0.9917 | 0.0007 | 0.0116 |
| Histone H2A.Z                                                        | 0.9988 | 0.9959 | 0.0104 | 0.0286 |
| Histone H2B type 1-K                                                 | 1.0000 | 0.9970 | 0.0004 | 0.0035 |
| Histone H3.2                                                         | 1.0000 | 0.9457 | 0.0003 | 0.0083 |
| Histone H4                                                           | 1.0000 | 0.9689 | 0.0002 | 0.0044 |
| HLA class I histocompatibility antigen A-68 alpha chain              | 0.0093 | 0.1667 | 0.9990 | 0.8774 |
| HLA class I histocompatibility antigen B-7 alpha chain               | 0.0013 | 0.0001 | 0.9652 | 1.0000 |
| Hsc70-interacting protein                                            | 0.5384 | 0.8729 | 0.7427 | 0.3680 |

|                                                                           |        |        |        |        |
|---------------------------------------------------------------------------|--------|--------|--------|--------|
| Hsp90 co-chaperone Cdc37                                                  | 0.6702 | 0.8160 | 0.6023 | 0.4367 |
| Huntingtin-interacting protein 1-related protein                          | 0.0097 | 0.0998 | 0.9975 | 0.9648 |
| Hypoxanthine-guanine phosphoribosyltransferase                            | 0.3554 | 0.1986 | 0.8351 | 0.9656 |
| Hypoxia up-regulated protein 1                                            | 0.9472 | 0.7219 | 0.2014 | 0.4789 |
| Importin subunit alpha-2                                                  | 0.2708 | 0.0230 | 0.8604 | 0.9983 |
| Importin subunit alpha-3                                                  | 0.5136 | 0.9396 | 0.7415 | 0.0775 |
| Importin subunit beta-1                                                   | 0.7830 | 0.8236 | 0.4686 | 0.3395 |
| Importin-5                                                                | 0.5816 | 0.8774 | 0.5766 | 0.2131 |
| Importin-8                                                                | 0.4822 | 0.3695 | 0.6889 | 0.8336 |
| Inhibitor of nuclear factor kappa-B kinase-interacting protein            | 0.9157 | 0.9925 | 0.2095 | 0.0730 |
| Inorganic pyrophosphatase                                                 | 0.4386 | 0.4119 | 0.8144 | 0.8462 |
| Inosine 5'-monophosphate dehydrogenase 2                                  | 0.7448 | 0.0550 | 0.5106 | 0.8830 |
| Inositol 1 4 5-trisphosphate receptor type 2                              | 0.9999 | 0.9829 | 0.0011 | 0.0489 |
| Inositol polyphosphate 1-phosphatase                                      | 0.1251 | 0.1707 | 0.9461 | 0.9574 |
| Inositol-3-phosphate synthase 1                                           | 0.0079 | 0.0000 | 0.9798 | 1.0000 |
| Insulin-like growth factor 2 mRNA-binding protein 1                       | 0.8179 | 0.1640 | 0.0046 | 0.7039 |
| Insulin-like growth factor 2 mRNA-binding protein 2                       | 0.9980 | 0.4152 | 0.0104 | 0.5187 |
| Insulin-like growth factor 2 mRNA-binding protein 3                       | 0.9900 | 0.5886 | 0.0076 | 0.0871 |
| Insulin-like growth factor-binding protein 7                              | 0.0103 | 0.0197 | 0.9597 | 0.9971 |
| Integrin alpha-2                                                          | 0.0706 | 0.2950 | 0.9685 | 0.8013 |
| Integrin alpha-5                                                          | 0.8696 | 0.8542 | 0.2329 | 0.3677 |
| Integrin alpha-6                                                          | 0.9189 | 0.9933 | 0.0740 | 0.0130 |
| Integrin alpha-V                                                          | 0.5377 | 0.4383 | 0.7421 | 0.4235 |
| Integrin beta-1                                                           | 0.3050 | 0.7601 | 0.7838 | 0.5397 |
| Integrin beta-3                                                           | 0.0770 | 0.1782 | 0.9100 | 0.9576 |
| Integrin-linked kinase-associated serine/threonine phosphatase 2C         | 0.0808 | 0.2401 | 0.8333 | 0.8338 |
| Integrin-linked protein kinase                                            | 0.0610 | 0.0749 | 0.9899 | 0.9910 |
| Intercellular adhesion molecule 2                                         | 0.7553 | 0.5100 | 0.2548 | 0.5502 |
| Interleukin enhancer-binding factor 2                                     | 0.9985 | 0.9699 | 0.0117 | 0.0911 |
| Interleukin enhancer-binding factor 3                                     | 0.9820 | 0.9783 | 0.0885 | 0.0873 |
| Inverted formin-2                                                         | 0.2675 | 0.8608 | 0.6275 | 0.4609 |
| Isocitrate dehydrogenase [NADP] mitochondrial                             | 0.0446 | 0.0218 | 0.9929 | 0.9985 |
| Isocitrate dehydrogenase [NADP] cytoplasmic                               | 0.4036 | 0.4873 | 0.7356 | 0.8526 |
| Isoleucyl-tRNA synthetase cytoplasmic                                     | 0.3153 | 0.3391 | 0.8639 | 0.9049 |
| Isovaleryl-CoA dehydrogenase mitochondrial                                | 0.9811 | 0.9624 | 0.0364 | 0.1125 |
| Junction plakoglobin                                                      | 0.1732 | 0.2915 | 0.9580 | 0.8760 |
| Keratin type I cytoskeletal 18                                            | 0.8860 | 0.8056 | 0.0471 | 0.0206 |
| Kinectin                                                                  | 0.3900 | 0.4724 | 0.8459 | 0.7184 |
| Kinesin-1 heavy chain                                                     | 0.4182 | 0.4685 | 0.8372 | 0.8476 |
| Lactoylglutathione lyase                                                  | 0.4063 | 0.8563 | 0.8302 | 0.2139 |
| LAG1 longevity assurance homolog 2                                        | 0.7460 | 0.6539 | 0.4819 | 0.7142 |
| Lamina-associated polypeptide 2 isoforms beta/gamma                       | 0.7424 | 0.8476 | 0.2688 | 0.0575 |
| Lamin-B1                                                                  | 0.1746 | 0.1264 | 0.9366 | 0.5856 |
| Lamin-B2                                                                  | 0.3627 | 0.1777 | 0.7765 | 0.5670 |
| Laminin subunit gamma-1                                                   | 0.0061 | 0.1118 | 0.9990 | 0.9765 |
| L-aminoadipate-semialdehyde dehydrogenase-phosphopantetheinyl transferase | 0.8201 | 0.4283 | 0.2265 | 0.7538 |
| Latent-transforming growth factor beta-binding protein 2                  | 0.0070 | 0.0071 | 0.4427 | 0.9996 |
| LETM1 and EF-hand domain-containing protein 1 mitochondrial               | 0.6887 | 0.7643 | 0.4483 | 0.3875 |
| Leucine-rich PPR motif-containing protein mitochondrial                   | 0.9394 | 0.9834 | 0.1975 | 0.0421 |
| Leucine-rich repeat-containing protein 47                                 | 0.8419 | 0.8309 | 0.4133 | 0.4645 |
| Leucine-rich repeat-containing protein 59                                 | 0.9023 | 0.8114 | 0.2825 | 0.3066 |
| Leukocyte elastase inhibitor                                              | 0.3947 | 0.7908 | 0.5417 | 0.2896 |
| Leukotriene A-4 hydrolase                                                 | 0.5094 | 0.9748 | 0.7440 | 0.1322 |
| LIM and senescent cell antigen-like-containing domain protein 1           | 0.8348 | 0.0273 | 0.2174 | 0.7389 |
| LIM and SH3 domain protein 1                                              | 0.4162 | 0.6467 | 0.7282 | 0.6478 |
| LIM domain and actin-binding protein 1                                    | 0.9903 | 0.9999 | 0.0218 | 0.0015 |

|                                                                |        |        |        |        |
|----------------------------------------------------------------|--------|--------|--------|--------|
| Liprin-alpha-1                                                 | 0.6636 | 0.4804 | 0.0096 | 0.1926 |
| Liprin-beta-1                                                  | 0.7884 | 0.7935 | 0.1688 | 0.3558 |
| LisH domain and HEAT repeat-containing protein KIAA1468        | 0.3517 | 0.2530 | 0.8369 | 0.8671 |
| L-lactate dehydrogenase A chain                                | 0.9713 | 0.9970 | 0.1016 | 0.0165 |
| L-lactate dehydrogenase B chain                                | 0.7376 | 0.9698 | 0.4092 | 0.0995 |
| Lon protease homolog mitochondrial                             | 0.0003 | 0.0000 | 1.0000 | 1.0000 |
| Long-chain fatty acid transport protein 4                      | 0.6524 | 0.9738 | 0.3750 | 0.1621 |
| Long-chain-fatty-acid--CoA ligase 3                            | 0.1776 | 0.9079 | 0.9559 | 0.2470 |
| Lupus La protein                                               | 0.6560 | 0.7878 | 0.5851 | 0.3515 |
| Lysosomal alpha-mannosidase                                    | 0.7929 | 0.6571 | 0.1556 | 0.5689 |
| Lysosomal Pro-X carboxypeptidase                               | 0.3974 | 0.0207 | 0.6865 | 0.9874 |
| Macrophage migration inhibitory factor                         | 0.4177 | 0.8180 | 0.6111 | 0.4599 |
| Macrophage-capping protein                                     | 0.0028 | 0.0521 | 0.9899 | 0.9540 |
| Major vault protein                                            | 0.8967 | 0.6695 | 0.0921 | 0.2696 |
| Malate dehydrogenase cytoplasmic                               | 0.7746 | 0.8461 | 0.4502 | 0.4355 |
| Malate dehydrogenase mitochondrial                             | 0.4410 | 0.4734 | 0.8013 | 0.8414 |
| Mannose-1-phosphate guanyltransferase beta                     | 0.0859 | 0.0337 | 0.9809 | 0.9805 |
| Mannosyl-oligosaccharide glucosidase                           | 0.8519 | 0.7647 | 0.2241 | 0.4936 |
| MARCKS-related protein                                         | 0.0764 | 0.2451 | 0.9741 | 0.8568 |
| Matrin-3                                                       | 0.5151 | 0.1573 | 0.6976 | 0.7390 |
| Membrane-associated progesterone receptor component 2          | 0.9900 | 0.9922 | 0.0301 | 0.0339 |
| Metastasis-associated protein MTA2                             | 0.9873 | 0.8098 | 0.0491 | 0.1989 |
| Methionine adenosyltransferase 2 subunit beta                  | 0.8215 | 0.6544 | 0.2120 | 0.7320 |
| Methionyl-tRNA synthetase cytoplasmic                          | 0.4422 | 0.6448 | 0.7968 | 0.6389 |
| Methylmalonyl-CoA mutase mitochondrial                         | 0.1746 | 0.4104 | 0.9528 | 0.7973 |
| Microtubule-actin cross-linking factor 1 isoform 4             | 0.5476 | 0.3195 | 0.7273 | 0.9046 |
| Microtubule-associated protein 1B                              | 0.6398 | 0.5365 | 0.4893 | 0.7938 |
| Microtubule-associated protein 1S                              | 0.1247 | 0.2761 | 0.9615 | 0.9121 |
| Microtubule-associated protein 2                               | 0.0006 | 0.0170 | 1.0000 | 0.9983 |
| Microtubule-associated protein 4                               | 0.1918 | 0.4167 | 0.9476 | 0.8484 |
| Microtubule-associated protein RP/EB family member 1           | 0.0910 | 0.1763 | 0.9785 | 0.9341 |
| Mitochondrial fission 1 protein                                | 0.0925 | 0.0528 | 0.9671 | 0.9946 |
| Mitochondrial import inner membrane translocase subunit Tim13  | 0.0072 | 0.0006 | 0.9992 | 1.0000 |
| Mitochondrial import inner membrane translocase subunit TIM44  | 0.3374 | 0.8119 | 0.8368 | 0.4464 |
| Mitochondrial import inner membrane translocase subunit Tim8 A | 0.0408 | 0.0705 | 0.9007 | 0.8414 |
| Mitochondrial inner membrane protein                           | 0.9052 | 0.9593 | 0.2420 | 0.2306 |
| Mitochondrial inner membrane protein OXA1L                     | 0.9531 | 0.9181 | 0.1203 | 0.2772 |
| Mitochondrial-processing peptidase subunit alpha               | 0.3990 | 0.8321 | 0.7007 | 0.4743 |
| Mitogen-activated protein kinase 1                             | 0.4639 | 0.6921 | 0.7804 | 0.6643 |
| Mitogen-activated protein kinase 14                            | 0.4635 | 0.1069 | 0.6182 | 0.9711 |
| Mitogen-activated protein kinase 3                             | 0.4660 | 0.4733 | 0.7432 | 0.8490 |
| Moesin                                                         | 0.3154 | 0.6133 | 0.8846 | 0.5957 |
| Monocarboxylate transporter 4                                  | 0.1048 | 0.8461 | 0.6922 | 0.4451 |
| Mps one binder kinase activator-like 1A                        | 0.6681 | 0.8212 | 0.5889 | 0.4086 |
| Mucin-6                                                        | 0.2708 | 0.0711 | 0.8973 | 0.8094 |
| Multifunctional protein ADE2                                   | 0.6542 | 0.8786 | 0.6133 | 0.3614 |
| Multimerin-1                                                   | 0.9998 | 0.7954 | 0.0010 | 0.0456 |
| Muscleblind-like protein 1                                     | 0.3475 | 0.3295 | 0.6069 | 0.8681 |
| Myoferlin                                                      | 0.9988 | 0.9912 | 0.0082 | 0.0237 |
| Myosin light polypeptide 6                                     | 0.0139 | 0.0242 | 0.9940 | 0.9530 |
| Myosin phosphatase Rho-interacting protein                     | 0.9599 | 0.9837 | 0.0084 | 0.0177 |
| Myosin regulatory light chain 12B                              | 0.1072 | 0.0872 | 0.9606 | 0.8115 |
| Myosin-10                                                      | 0.2183 | 0.0513 | 0.9014 | 0.9128 |
| Myosin-9                                                       | 0.0225 | 0.0179 | 0.9923 | 0.9776 |
| Myosin-1c                                                      | 0.8046 | 0.7251 | 0.3039 | 0.5881 |
| Myosin-1e                                                      | 0.1689 | 0.0048 | 0.9076 | 0.9998 |

|                                                                            |        |        |        |        |
|----------------------------------------------------------------------------|--------|--------|--------|--------|
| Myosin-Va                                                                  | 0.7383 | 0.5148 | 0.2658 | 0.7019 |
| Myristoylated alanine-rich C-kinase substrate                              | 0.3958 | 0.6981 | 0.7126 | 0.3260 |
| Na(+)/H(+) exchange regulatory cofactor NHE-RF2                            | 0.9718 | 0.9763 | 0.0165 | 0.0488 |
| N-acetylglucosamine-6-sulfatase                                            | 0.7301 | 0.7678 | 0.3329 | 0.5644 |
| NAD(P) transhydrogenase mitochondrial                                      | 0.5059 | 0.9096 | 0.6869 | 0.2430 |
| NAD(P)H dehydrogenase [quinone] 1                                          | 0.8353 | 0.9978 | 0.0727 | 0.0037 |
| NADH dehydrogenase [ubiquinone] 1 alpha subcomplex subunit 13              | 0.7898 | 0.6574 | 0.4616 | 0.6414 |
| NADH dehydrogenase [ubiquinone] 1 alpha subcomplex subunit 5               | 0.6981 | 0.2713 | 0.4304 | 0.8998 |
| NADH dehydrogenase [ubiquinone] 1 alpha subcomplex subunit 9 mitochondrial | 0.0770 | 0.2599 | 0.8077 | 0.8943 |
| NADH dehydrogenase [ubiquinone] 1 beta subcomplex subunit 10               | 0.9517 | 0.9155 | 0.1619 | 0.2854 |
| NADH dehydrogenase [ubiquinone] 1 beta subcomplex subunit 7                | 0.7686 | 0.8926 | 0.2454 | 0.2643 |
| NADH dehydrogenase [ubiquinone] flavoprotein 2 mitochondrial               | 0.0746 | 0.1227 | 0.9801 | 0.9782 |
| NADH dehydrogenase [ubiquinone] iron-sulfur protein 2 mitochondrial        | 0.0640 | 0.3689 | 0.9431 | 0.5462 |
| NADH dehydrogenase [ubiquinone] iron-sulfur protein 3 mitochondrial        | 0.8842 | 0.8638 | 0.1838 | 0.2338 |
| NADH-cytochrome b5 reductase 3                                             | 0.6991 | 0.5942 | 0.3192 | 0.4945 |
| NADH-ubiquinone oxidoreductase 75 kDa subunit mitochondrial                | 0.6984 | 0.6994 | 0.4930 | 0.6928 |
| NADPH:adenodoxin oxidoreductase mitochondrial                              | 0.5586 | 0.7381 | 0.2092 | 0.4916 |
| NADPH--cytochrome P450 reductase                                           | 0.5351 | 0.8241 | 0.3986 | 0.3964 |
| Nardilysin                                                                 | 0.4825 | 0.9709 | 0.6956 | 0.1770 |
| Nascent polypeptide-associated complex subunit alpha                       | 0.3811 | 0.5845 | 0.8481 | 0.6669 |
| NEDD8                                                                      | 0.7776 | 0.7375 | 0.4354 | 0.6492 |
| NEDD8-activating enzyme E1 regulatory subunit                              | 0.6042 | 0.2957 | 0.5391 | 0.8866 |
| Neighbor of COX4                                                           | 0.0452 | 0.4007 | 0.9848 | 0.8853 |
| Nestin                                                                     | 0.4770 | 0.3376 | 0.7291 | 0.4855 |
| Neuroblast differentiation-associated protein AHNAK                        | 0.9587 | 0.9940 | 0.1705 | 0.0604 |
| Neuroplasin                                                                | 0.7840 | 0.8814 | 0.3017 | 0.1580 |
| Neutral alpha-glucosidase AB                                               | 0.4566 | 0.3245 | 0.7303 | 0.9142 |
| Neutral cholesterol ester hydrolase 1                                      | 0.2064 | 0.0627 | 0.1470 | 0.8151 |
| NHP2-like protein 1                                                        | 0.9318 | 0.9846 | 0.2208 | 0.0635 |
| Niban-like protein 1                                                       | 0.9109 | 0.8401 | 0.2461 | 0.3834 |
| Nicalin                                                                    | 0.1613 | 0.0401 | 0.9508 | 0.9968 |
| Nicotinamide N-methyltransferase                                           | 0.9648 | 0.4815 | 0.1418 | 0.7475 |
| Nicotinamide phosphoribosyltransferase                                     | 0.6839 | 0.9279 | 0.2876 | 0.2641 |
| Nidogen-1                                                                  | 0.0335 | 0.0011 | 0.9923 | 1.0000 |
| Nitric oxide synthase-interacting protein                                  | 0.4227 | 0.9570 | 0.2037 | 0.0062 |
| Nodal modulator 1                                                          | 0.8933 | 0.8323 | 0.2342 | 0.4447 |
| Non-histone chromosomal protein HMG-17                                     | 0.7280 | 0.8842 | 0.1973 | 0.0083 |
| Non-POU domain-containing octamer-binding protein                          | 0.5706 | 0.1042 | 0.6019 | 0.7319 |
| Non-specific lipid-transfer protein                                        | 0.3217 | 0.8871 | 0.8956 | 0.2490 |
| NSFL1 cofactor p47                                                         | 0.9649 | 0.9168 | 0.0477 | 0.2741 |
| Nuclear autoantigenic sperm protein                                        | 0.1662 | 0.7566 | 0.8437 | 0.1056 |
| Nuclear migration protein nudC                                             | 0.7161 | 0.8304 | 0.5818 | 0.3668 |
| Nuclear mitotic apparatus protein 1                                        | 0.5138 | 0.7313 | 0.6237 | 0.6240 |
| Nuclear pore complex protein Nup133                                        | 0.7019 | 0.8364 | 0.4578 | 0.3549 |
| Nuclear receptor subfamily 5 group A member 2                              | 0.1482 | 0.0213 | 0.9343 | 0.9983 |
| Nuclear transport factor 2                                                 | 0.0936 | 0.1648 | 0.9797 | 0.9667 |
| Nuclear ubiquitous casein and cyclin-dependent kinases substrate           | 0.7547 | 0.9152 | 0.5064 | 0.0798 |
| Nuclease-sensitive element-binding protein 1                               | 0.8900 | 0.9292 | 0.2017 | 0.2473 |
| Nucleobindin-1                                                             | 0.8670 | 0.4497 | 0.2963 | 0.8318 |
| Nucleobindin-2                                                             | 0.8330 | 0.8674 | 0.3491 | 0.2820 |
| Nucleolin                                                                  | 0.9974 | 0.8973 | 0.0132 | 0.1748 |
| Nucleolysin TIA-1 isoform p40                                              | 0.7071 | 0.7057 | 0.3916 | 0.5494 |
| Nucleophosmin                                                              | 0.9995 | 0.6627 | 0.0049 | 0.1566 |
| Nucleoprotein TPR                                                          | 0.7806 | 0.9214 | 0.3843 | 0.1967 |
| Nucleoside diphosphate kinase B                                            | 0.7641 | 0.9237 | 0.4715 | 0.2675 |
| Nucleosome assembly protein 1-like 1                                       | 0.2621 | 0.1558 | 0.9106 | 0.9732 |

|                                                             |        |        |        |        |
|-------------------------------------------------------------|--------|--------|--------|--------|
| Nucleosome assembly protein 1-like 4                        | 0.4986 | 0.7143 | 0.7457 | 0.5751 |
| Obg-like ATPase 1                                           | 0.3321 | 0.3882 | 0.8095 | 0.8847 |
| Oligosaccharyltransferase complex subunit OSTC              | 0.0195 | 0.0010 | 0.9954 | 0.9999 |
| Ornithine aminotransferase mitochondrial                    | 0.3359 | 0.2729 | 0.8364 | 0.9278 |
| Osteoclast-stimulating factor 1                             | 0.0118 | 0.0115 | 0.9975 | 0.9886 |
| Palladin                                                    | 0.7097 | 0.1191 | 0.5875 | 0.8298 |
| Parathyromosin                                              | 0.3625 | 0.1847 | 0.7847 | 0.9478 |
| PDZ and LIM domain protein 1                                | 0.9923 | 0.9999 | 0.0279 | 0.0023 |
| PDZ and LIM domain protein 4                                | 0.7052 | 0.5247 | 0.5810 | 0.7344 |
| PDZ and LIM domain protein 5                                | 0.0205 | 0.4887 | 0.8979 | 0.7741 |
| PDZ and LIM domain protein 7                                | 0.0335 | 0.0257 | 0.9697 | 0.9656 |
| Pentatricopeptide repeat-containing protein 3 mitochondrial | 0.1489 | 0.0830 | 0.9211 | 0.9867 |
| Peptidyl-prolyl cis-trans isomerase A                       | 0.2901 | 0.6856 | 0.8782 | 0.4615 |
| Peptidyl-prolyl cis-trans isomerase B                       | 0.5856 | 0.7531 | 0.6463 | 0.3698 |
| Peptidyl-prolyl cis-trans isomerase FKBP10                  | 0.1042 | 0.2461 | 0.7935 | 0.9035 |
| Peptidyl-prolyl cis-trans isomerase FKBP11                  | 0.4285 | 0.6093 | 0.6492 | 0.6888 |
| Peptidyl-prolyl cis-trans isomerase FKBP1A                  | 0.5654 | 0.9488 | 0.5941 | 0.2506 |
| Peptidyl-prolyl cis-trans isomerase FKBP3                   | 0.9603 | 0.9336 | 0.1276 | 0.3002 |
| Peptidyl-prolyl cis-trans isomerase FKBP4                   | 0.3247 | 0.8447 | 0.0260 | 0.3066 |
| Peptidyl-prolyl cis-trans isomerase NIMA-interacting 1      | 0.4608 | 0.3990 | 0.8084 | 0.7480 |
| Peptidyl-prolyl cis-trans isomerase NIMA-interacting 4      | 0.1180 | 0.7478 | 0.9561 | 0.4457 |
| Perilipin-3                                                 | 0.3049 | 0.6270 | 0.8819 | 0.7044 |
| Periostin                                                   | 0.9907 | 0.8713 | 0.0029 | 0.0024 |
| Peroxidasin homolog                                         | 0.2340 | 0.0858 | 0.9121 | 0.7894 |
| Peroxiredoxin-1                                             | 0.5857 | 0.8142 | 0.6445 | 0.3844 |
| Peroxiredoxin-2                                             | 0.7905 | 0.8667 | 0.4706 | 0.3521 |
| Peroxiredoxin-4                                             | 0.1864 | 0.2368 | 0.7509 | 0.9435 |
| Peroxiredoxin-5 mitochondrial                               | 0.0933 | 0.0890 | 0.9492 | 0.9799 |
| Peroxiredoxin-6                                             | 0.8603 | 0.9658 | 0.3566 | 0.1399 |
| Peroxisomal membrane protein PEX14                          | 0.6323 | 0.9973 | 0.4044 | 0.0179 |
| Peroxisomal multifunctional enzyme type 2                   | 0.8462 | 0.4633 | 0.1183 | 0.4823 |
| PERQ amino acid-rich with GYF domain-containing protein 2   | 0.5542 | 0.3153 | 0.3250 | 0.8857 |
| PHD finger-like domain-containing protein 5A                | 0.1159 | 0.0423 | 0.9538 | 0.9910 |
| Phenylalanyl-tRNA synthetase beta chain                     | 0.9218 | 0.8761 | 0.2494 | 0.2690 |
| Phosphate carrier protein mitochondrial                     | 0.5462 | 0.7620 | 0.7123 | 0.5552 |
| Phosphatidylethanolamine-binding protein 1                  | 0.4708 | 0.9507 | 0.8072 | 0.2057 |
| Phosphatidylinositol transfer protein alpha isoform         | 0.8313 | 0.9564 | 0.1289 | 0.1576 |
| Phosphatidylinositol transfer protein beta isoform          | 0.4023 | 0.5293 | 0.8386 | 0.7833 |
| Phosphatidylinositol-binding clathrin assembly protein      | 0.0116 | 0.0563 | 0.9936 | 0.9822 |
| Phosphoglycerate kinase 1                                   | 0.5737 | 0.8906 | 0.6621 | 0.3573 |
| Phosphoglycerate mutase 1                                   | 0.7440 | 0.9193 | 0.4537 | 0.2915 |
| Phosphoribosylformylglycinamide synthase                    | 0.8412 | 0.8353 | 0.0846 | 0.4310 |
| Phosphoserine aminotransferase                              | 0.9250 | 0.8343 | 0.0571 | 0.1354 |
| Pirin                                                       | 0.9694 | 0.9842 | 0.0429 | 0.0021 |
| PITH domain-containing protein 1                            | 0.1606 | 0.3505 | 0.4761 | 0.8695 |
| Plasminogen activator inhibitor 1                           | 0.8094 | 0.9929 | 0.0741 | 0.0481 |
| Plasminogen activator inhibitor 1 RNA-binding protein       | 0.6593 | 0.8303 | 0.3840 | 0.4057 |
| Plastin-3                                                   | 0.5627 | 0.9629 | 0.6552 | 0.2124 |
| Platelet endothelial cell adhesion molecule                 | 0.6720 | 0.7268 | 0.6061 | 0.6218 |
| Platelet-activating factor acetylhydrolase IB subunit alpha | 0.6357 | 0.4420 | 0.5700 | 0.8695 |
| Platelet-activating factor acetylhydrolase IB subunit beta  | 0.1534 | 0.2925 | 0.9575 | 0.9018 |
| Platelet-activating factor acetylhydrolase IB subunit gamma | 0.0001 | 0.0000 | 1.0000 | 1.0000 |
| Plectin                                                     | 0.8962 | 0.3926 | 0.2904 | 0.4885 |
| PNMA-like protein 1                                         | 0.8634 | 0.9989 | 0.0042 | 0.0167 |
| Poliiovirus receptor                                        | 0.8606 | 0.3424 | 0.1048 | 0.4960 |
| Poly [ADP-ribose] polymerase 1                              | 0.0617 | 0.0244 | 0.9881 | 0.9954 |

|                                                           |        |        |        |        |
|-----------------------------------------------------------|--------|--------|--------|--------|
| Poly(rC)-binding protein 1                                | 0.4572 | 0.8443 | 0.7809 | 0.3963 |
| Poly(rC)-binding protein 2                                | 0.3034 | 0.6007 | 0.8548 | 0.5709 |
| Poly(U)-binding-splicing factor PUF60                     | 0.6157 | 0.8042 | 0.5590 | 0.3088 |
| Polyadenylate-binding protein 1                           | 0.9961 | 0.9930 | 0.0262 | 0.0540 |
| Polymerase delta-interacting protein 3                    | 0.8788 | 0.8667 | 0.3483 | 0.1423 |
| Polymerase I and transcript release factor                | 0.9765 | 0.8361 | 0.1155 | 0.2372 |
| Polypeptide N-acetylgalactosaminyltransferase 2           | 0.8959 | 0.8262 | 0.2886 | 0.4661 |
| Polypyrimidine tract-binding protein 1                    | 0.5132 | 0.9238 | 0.6028 | 0.0331 |
| POTE ankyrin domain family member E                       | 0.6826 | 0.9078 | 0.6256 | 0.2637 |
| Prefoldin subunit 1                                       | 0.1549 | 0.7030 | 0.9333 | 0.4253 |
| Prefoldin subunit 2                                       | 0.5381 | 0.7460 | 0.6498 | 0.5723 |
| Prefoldin subunit 3                                       | 0.2767 | 0.5769 | 0.9162 | 0.7471 |
| Prefoldin subunit 5                                       | 0.4763 | 0.9641 | 0.7467 | 0.1293 |
| Prefoldin subunit 6                                       | 0.5218 | 0.5103 | 0.7230 | 0.8266 |
| Prelamin-A/C                                              | 0.7528 | 0.3352 | 0.3898 | 0.3091 |
| Pre-mRNA-processing factor 19                             | 0.9982 | 0.9777 | 0.0069 | 0.0754 |
| Presequence protease mitochondrial                        | 0.9002 | 0.9183 | 0.2727 | 0.3462 |
| Proactivator polypeptide                                  | 0.2382 | 0.7322 | 0.8636 | 0.3462 |
| Probable ATP-dependent RNA helicase DDX17                 | 0.8298 | 0.7625 | 0.3388 | 0.3194 |
| Probable ATP-dependent RNA helicase DDX5                  | 0.8251 | 0.5859 | 0.2459 | 0.2952 |
| Probable glutathione peroxidase 8                         | 0.0965 | 0.5253 | 0.9644 | 0.5028 |
| Procollagen galactosyltransferase 1                       | 0.0180 | 0.0080 | 0.9966 | 0.9738 |
| Procollagen-lysine 2-oxoglutarate 5-dioxygenase 1         | 0.0446 | 0.0048 | 0.9243 | 0.9587 |
| Procollagen-lysine 2-oxoglutarate 5-dioxygenase 2         | 0.8389 | 0.9481 | 0.1613 | 0.1172 |
| Procollagen-lysine 2-oxoglutarate 5-dioxygenase 3         | 0.0030 | 0.0061 | 0.9996 | 0.9572 |
| Profilin-1                                                | 0.3039 | 0.6502 | 0.9041 | 0.7068 |
| Programmed cell death 6-interacting protein               | 0.3370 | 0.5348 | 0.7525 | 0.7810 |
| Programmed cell death protein 4                           | 0.0009 | 0.0002 | 0.9999 | 1.0000 |
| Programmed cell death protein 5                           | 0.6807 | 0.8045 | 0.6068 | 0.5408 |
| Programmed cell death protein 6                           | 0.9593 | 0.9897 | 0.1079 | 0.0874 |
| Prohibitin                                                | 0.6771 | 0.8633 | 0.5986 | 0.4126 |
| Prohibitin-2                                              | 0.2776 | 0.6608 | 0.8456 | 0.6434 |
| Proliferating cell nuclear antigen                        | 0.2480 | 0.6798 | 0.8619 | 0.1275 |
| Proliferation-associated protein 2G4                      | 0.7493 | 0.7721 | 0.4529 | 0.3997 |
| Proline synthase co-transcribed bacterial homolog protein | 0.7377 | 0.8383 | 0.2144 | 0.2866 |
| Proline-rich AKT1 substrate 1                             | 0.9067 | 0.6954 | 0.1225 | 0.5871 |
| Prolyl 4-hydroxylase subunit alpha-2                      | 0.3413 | 0.6385 | 0.3900 | 0.6715 |
| Prostaglandin E synthase 3                                | 0.1170 | 0.7698 | 0.9445 | 0.1645 |
| Prostaglandin G/H synthase 1                              | 0.9505 | 0.9762 | 0.0255 | 0.0055 |
| Proteasome activator complex subunit 1                    | 0.0027 | 0.0796 | 0.9997 | 0.9861 |
| Proteasome activator complex subunit 2                    | 0.7335 | 0.9764 | 0.3174 | 0.0929 |
| Proteasome subunit alpha type-1                           | 0.5693 | 0.8101 | 0.7045 | 0.3847 |
| Proteasome subunit alpha type-2                           | 0.5497 | 0.5591 | 0.6898 | 0.7705 |
| Proteasome subunit alpha type-3                           | 0.3960 | 0.4233 | 0.6727 | 0.8280 |
| Proteasome subunit alpha type-5                           | 0.5856 | 0.7509 | 0.6219 | 0.5703 |
| Proteasome subunit alpha type-6                           | 0.8588 | 0.7625 | 0.3619 | 0.5924 |
| Proteasome subunit alpha type-7                           | 0.7527 | 0.9171 | 0.4936 | 0.3114 |
| Proteasome subunit beta type-1                            | 0.7796 | 0.6740 | 0.4577 | 0.6338 |
| Proteasome subunit beta type-6                            | 0.7198 | 0.9163 | 0.5594 | 0.1265 |
| Proteasome subunit beta type-7                            | 0.7307 | 0.2306 | 0.3664 | 0.9241 |
| Protein AHNAK2                                            | 0.8836 | 0.9495 | 0.0233 | 0.1351 |
| Protein BRICK1                                            | 0.9863 | 0.8600 | 0.0215 | 0.4505 |
| Protein canopy homolog 3                                  | 0.0172 | 0.1525 | 0.9981 | 0.8567 |
| Protein canopy homolog 4                                  | 0.6625 | 0.5361 | 0.3520 | 0.7280 |
| Protein CDV3 homolog                                      | 0.9249 | 0.9830 | 0.1377 | 0.1068 |
| Protein CutA                                              | 0.8282 | 0.7573 | 0.2003 | 0.6016 |

|                                                                    |        |        |        |        |
|--------------------------------------------------------------------|--------|--------|--------|--------|
| Protein CYR61                                                      | 0.8626 | 0.0059 | 0.3417 | 0.9994 |
| Protein diaphanous homolog 1                                       | 0.7630 | 0.6912 | 0.2402 | 0.3938 |
| Protein diaphanous homolog 2                                       | 0.0073 | 0.1030 | 0.9992 | 0.9189 |
| Protein disulfide-isomerase                                        | 0.5052 | 0.3661 | 0.6269 | 0.8810 |
| Protein disulfide-isomerase A3                                     | 0.4528 | 0.5531 | 0.8168 | 0.7759 |
| Protein disulfide-isomerase A4                                     | 0.6064 | 0.5091 | 0.6739 | 0.7013 |
| Protein disulfide-isomerase A5                                     | 0.8551 | 0.0463 | 0.1076 | 0.9497 |
| Protein disulfide-isomerase A6                                     | 0.3978 | 0.6484 | 0.8223 | 0.5503 |
| Protein disulfide-isomerase TMX3                                   | 0.8626 | 0.7590 | 0.3376 | 0.3261 |
| Protein DJ-1                                                       | 0.3419 | 0.9516 | 0.8567 | 0.1525 |
| Protein enabled homolog                                            | 0.8067 | 0.7930 | 0.0275 | 0.3294 |
| Protein ERGIC-53                                                   | 0.6593 | 0.5844 | 0.6229 | 0.5396 |
| Protein FAM136A                                                    | 0.9260 | 0.9814 | 0.2509 | 0.1249 |
| Protein FAM43A                                                     | 0.3951 | 0.1175 | 0.7968 | 0.9733 |
| Protein flightless-1 homolog                                       | 0.9665 | 0.9613 | 0.1060 | 0.1954 |
| Protein KIAA1967                                                   | 0.7527 | 0.6602 | 0.5074 | 0.5880 |
| Protein kinase C alpha type                                        | 0.3630 | 0.3746 | 0.2044 | 0.8375 |
| Protein kinase C and casein kinase substrate in neurons protein 2  | 0.1464 | 0.8192 | 0.9665 | 0.4410 |
| Protein kinase C delta-binding protein                             | 0.8766 | 0.9600 | 0.1204 | 0.0061 |
| Protein lin-7 homolog C                                            | 0.7890 | 0.6739 | 0.1923 | 0.6820 |
| Protein LZIC                                                       | 0.9169 | 0.8679 | 0.2157 | 0.3972 |
| Protein NDRG1                                                      | 0.8997 | 0.9993 | 0.1779 | 0.0094 |
| Protein NOXP20                                                     | 0.3449 | 0.6070 | 0.8836 | 0.6720 |
| Protein phosphatase 1 regulatory subunit 7                         | 0.7391 | 0.6852 | 0.4484 | 0.6938 |
| Protein phosphatase 1F                                             | 0.8752 | 0.8531 | 0.2364 | 0.3756 |
| Protein PML                                                        | 0.7795 | 0.8676 | 0.3195 | 0.0926 |
| Protein PRRC1                                                      | 0.4486 | 0.4609 | 0.7985 | 0.7484 |
| Protein PRRC2C                                                     | 0.9687 | 0.8672 | 0.0474 | 0.4180 |
| Protein Red                                                        | 0.5418 | 0.7399 | 0.7180 | 0.5847 |
| Protein S100-A10                                                   | 0.6237 | 0.9820 | 0.5417 | 0.0687 |
| Protein S100-A11                                                   | 0.4077 | 0.0333 | 0.7934 | 0.9110 |
| Protein S100-A13                                                   | 0.3993 | 0.4029 | 0.4046 | 0.5946 |
| Protein S100-A16                                                   | 0.8460 | 0.4248 | 0.3677 | 0.7087 |
| Protein S100-A6                                                    | 0.9937 | 0.9519 | 0.0193 | 0.0647 |
| Protein SEC13 homolog                                              | 0.1947 | 0.7772 | 0.9441 | 0.4888 |
| Protein SET                                                        | 0.2372 | 0.7550 | 0.8736 | 0.2890 |
| Protein sprouty homolog 2                                          | 0.3136 | 0.0492 | 0.8546 | 0.9946 |
| Protein TFG                                                        | 0.4837 | 0.2768 | 0.4648 | 0.9418 |
| Protein transport protein Sec23A                                   | 0.8164 | 0.9182 | 0.4337 | 0.3333 |
| Protein transport protein Sec24C                                   | 0.2811 | 0.4015 | 0.9115 | 0.7653 |
| Protein transport protein Sec31A                                   | 0.0688 | 0.0140 | 0.9864 | 0.9992 |
| Protein unc-45 homolog A                                           | 0.7916 | 0.7777 | 0.3305 | 0.5868 |
| Protein-glutamine gamma-glutamyltransferase 2                      | 0.9778 | 0.9982 | 0.0251 | 0.0036 |
| Protein-L-isoaspartate(D-aspartate) O-methyltransferase            | 0.3169 | 0.7011 | 0.8910 | 0.5253 |
| Prothymosin alpha                                                  | 0.2224 | 0.3152 | 0.8109 | 0.4537 |
| Protocadherin-1                                                    | 0.4269 | 0.1508 | 0.8331 | 0.9455 |
| Protoporphyrinogen oxidase                                         | 0.5950 | 0.9251 | 0.4122 | 0.3244 |
| Purine nucleoside phosphorylase                                    | 0.9936 | 0.6632 | 0.0106 | 0.4782 |
| Puromycin-sensitive aminopeptidase                                 | 0.8892 | 0.8645 | 0.3026 | 0.3547 |
| Putative 40S ribosomal protein S26-like 1                          | 0.9999 | 0.4311 | 0.0010 | 0.3109 |
| Putative elongation factor 1-alpha-like 3                          | 0.3856 | 0.7363 | 0.8194 | 0.3642 |
| Putative pre-mRNA-splicing factor ATP-dependent RNA helicase DHX15 | 0.7265 | 0.7899 | 0.5595 | 0.5753 |
| Putative RNA-binding protein Luc7-like 2                           | 0.8331 | 0.9643 | 0.2856 | 0.1505 |
| Putative tropomyosin alpha-3 chain-like protein                    | 0.4198 | 0.8256 | 0.7779 | 0.4680 |
| Pyridoxal kinase                                                   | 0.9845 | 0.9981 | 0.0783 | 0.0188 |
| Pyridoxine-5'-phosphate oxidase                                    | 0.4890 | 0.9891 | 0.1540 | 0.0248 |



|                                                                |        |        |        |        |
|----------------------------------------------------------------|--------|--------|--------|--------|
| Pyrraline-5-carboxylate reductase 1 mitochondrial              | 0.5854 | 0.8004 | 0.3730 | 0.1788 |
| Pyruvate dehydrogenase E1 component subunit beta mitochondrial | 0.1234 | 0.0278 | 0.9642 | 0.9980 |
| Pyruvate kinase isozymes M1/M2                                 | 0.5050 | 0.9360 | 0.7193 | 0.2414 |
| Quinone oxidoreductase PIG3                                    | 0.0828 | 0.0300 | 0.9692 | 0.9970 |
| Rab GDP dissociation inhibitor beta                            | 0.4130 | 0.7187 | 0.8421 | 0.5841 |
| Rab11 family-interacting protein 5                             | 0.9262 | 0.9011 | 0.1575 | 0.2263 |
| Radixin                                                        | 0.3526 | 0.6411 | 0.8753 | 0.5996 |
| Ran GTPase-activating protein 1                                | 0.7293 | 0.9819 | 0.4476 | 0.1339 |
| Rap1 GTPase-GDP dissociation stimulator 1                      | 0.7121 | 0.7985 | 0.4497 | 0.5487 |
| Ras GTPase-activating protein-binding protein 1                | 0.9870 | 0.9488 | 0.0399 | 0.0732 |
| Ras GTPase-activating protein-binding protein 2                | 0.9900 | 0.9348 | 0.0548 | 0.0189 |
| Ras GTPase-activating-like protein IQGAP1                      | 0.6198 | 0.6818 | 0.6252 | 0.6839 |
| Ras suppressor protein 1                                       | 0.1737 | 0.1880 | 0.9490 | 0.9599 |
| Ras-interacting protein 1                                      | 0.8495 | 0.4640 | 0.3503 | 0.7876 |
| Ras-related C3 botulinum toxin substrate 1                     | 0.6319 | 0.8081 | 0.6210 | 0.5459 |
| Ras-related C3 botulinum toxin substrate 2                     | 0.7058 | 0.8824 | 0.4856 | 0.4137 |
| Ras-related protein Rab-10                                     | 0.2057 | 0.5804 | 0.9353 | 0.7630 |
| Ras-related protein Rab-11B                                    | 0.9054 | 0.8783 | 0.2738 | 0.3856 |
| Ras-related protein Rab-1A                                     | 0.2522 | 0.6343 | 0.8981 | 0.6939 |
| Ras-related protein Rab-1B                                     | 0.4059 | 0.8385 | 0.8396 | 0.4973 |
| Ras-related protein Rab-2A                                     | 0.0767 | 0.0717 | 0.9862 | 0.9918 |
| Ras-related protein Rab-5B                                     | 1.0000 | 0.6557 | 0.0005 | 0.6694 |
| Ras-related protein Rab-5C                                     | 0.6239 | 0.2118 | 0.5370 | 0.9584 |
| Ras-related protein Rab-7a                                     | 0.6090 | 0.7962 | 0.6751 | 0.4400 |
| Ras-related protein Ral-A                                      | 0.0174 | 0.4380 | 0.9899 | 0.8534 |
| Ras-related protein Ral-B                                      | 0.0263 | 0.5218 | 0.9837 | 0.8148 |
| Ras-related protein Rap-1b                                     | 0.1152 | 0.1238 | 0.9748 | 0.9710 |
| RELT-like protein 1                                            | 0.5982 | 0.9172 | 0.5663 | 0.2187 |
| Reticulocalbin-1                                               | 0.3115 | 0.1022 | 0.8950 | 0.9046 |
| Reticulocalbin-3                                               | 0.9998 | 0.9339 | 0.0006 | 0.0008 |
| Reticulon-4                                                    | 0.7248 | 0.1172 | 0.2304 | 0.5191 |
| Retinal dehydrogenase 1                                        | 0.7428 | 0.7323 | 0.0022 | 0.0506 |
| Rho GDP-dissociation inhibitor 1                               | 0.8848 | 0.9438 | 0.3145 | 0.2851 |
| Rho GDP-dissociation inhibitor 2                               | 0.0437 | 0.7037 | 0.9910 | 0.6645 |
| Rho GTPase-activating protein 1                                | 0.1348 | 0.9132 | 0.9662 | 0.2850 |
| Rho GTPase-activating protein 17                               | 0.5655 | 0.6319 | 0.6529 | 0.7151 |
| Rho-related GTP-binding protein RhoB                           | 0.0713 | 0.4331 | 0.9799 | 0.7528 |
| Rho-related GTP-binding protein RhoC                           | 0.6709 | 0.7656 | 0.5740 | 0.6202 |
| Ribonuclease inhibitor                                         | 0.6056 | 0.1956 | 0.4347 | 0.8424 |
| Ribosome-binding protein 1                                     | 0.9625 | 0.7868 | 0.1121 | 0.4571 |
| Ribulose-phosphate 3-epimerase                                 | 0.1713 | 0.3739 | 0.9339 | 0.8423 |
| RNA-binding motif single-stranded-interacting protein 2        | 0.8910 | 0.3138 | 0.3251 | 0.8683 |
| RNA-binding protein 10                                         | 0.5364 | 0.6443 | 0.5795 | 0.4593 |
| RNA-binding protein 14                                         | 0.9934 | 0.9912 | 0.0188 | 0.0481 |
| RNA-binding protein 39                                         | 0.7772 | 0.9569 | 0.3541 | 0.1845 |
| RNA-binding protein FUS                                        | 0.5234 | 0.5763 | 0.3993 | 0.3242 |
| Rootletin                                                      | 0.7665 | 0.7544 | 0.2034 | 0.3856 |
| rRNA 2'-O-methyltransferase fibrillarin                        | 0.9999 | 0.9998 | 0.0015 | 0.0019 |
| RuvB-like 1                                                    | 0.0145 | 0.0461 | 0.9984 | 0.9919 |
| S-adenosylmethionine synthase isoform type-2                   | 0.2142 | 0.4272 | 0.9288 | 0.8235 |
| SAP30-binding protein                                          | 0.5963 | 0.9621 | 0.6331 | 0.1580 |
| Sarcoplasmic/endoplasmic reticulum calcium ATPase 2            | 0.5256 | 0.5361 | 0.6950 | 0.8025 |
| Sec1 family domain-containing protein 1                        | 0.5327 | 0.8719 | 0.7549 | 0.4358 |
| SEC23-interacting protein                                      | 0.2458 | 0.5240 | 0.9209 | 0.6468 |
| Secernin-1                                                     | 0.0346 | 0.0904 | 0.9885 | 0.9801 |
| Sepiapterin reductase                                          | 0.7526 | 0.9802 | 0.4993 | 0.1003 |

|                                                                                   |        |        |        |        |
|-----------------------------------------------------------------------------------|--------|--------|--------|--------|
| Septin-2                                                                          | 0.6808 | 0.7361 | 0.4265 | 0.6298 |
| Septin-7                                                                          | 0.6845 | 0.8426 | 0.6029 | 0.3912 |
| Septin-9                                                                          | 0.3494 | 0.0797 | 0.3148 | 0.8847 |
| Serine hydroxymethyltransferase mitochondrial                                     | 0.4848 | 0.6548 | 0.6575 | 0.3229 |
| Serine protease HTRA1                                                             | 0.7418 | 0.5456 | 0.5296 | 0.7851 |
| Serine/arginine repetitive matrix protein 1                                       | 0.5826 | 0.5590 | 0.3716 | 0.1614 |
| Serine/arginine repetitive matrix protein 2                                       | 0.5596 | 0.7610 | 0.5890 | 0.6237 |
| Serine/arginine-rich splicing factor 1                                            | 0.9602 | 0.4724 | 0.1320 | 0.8165 |
| Serine/arginine-rich splicing factor 11                                           | 0.7478 | 0.9482 | 0.4861 | 0.2170 |
| Serine/arginine-rich splicing factor 6                                            | 0.9513 | 0.6822 | 0.1466 | 0.3994 |
| Serine/arginine-rich splicing factor 7                                            | 0.7284 | 0.5458 | 0.5362 | 0.6971 |
| Serine/arginine-rich splicing factor 8                                            | 0.9355 | 0.7738 | 0.1611 | 0.4979 |
| Serine/threonine-protein kinase 24                                                | 0.0881 | 0.3861 | 0.9769 | 0.9014 |
| Serine/threonine-protein kinase N1                                                | 0.3733 | 0.1748 | 0.7979 | 0.9499 |
| Serine/threonine-protein kinase PAK 2                                             | 0.2936 | 0.7831 | 0.8969 | 0.2122 |
| Serine/threonine-protein phosphatase 2A 56 kDa regulatory subunit epsilon isoform | 0.1358 | 0.7647 | 0.8379 | 0.4370 |
| Serine/threonine-protein phosphatase 2A 65 kDa regulatory subunit A alpha isoform | 0.5635 | 0.3763 | 0.6856 | 0.8777 |
| Serine/threonine-protein phosphatase 2A activator                                 | 0.9001 | 0.9968 | 0.1469 | 0.0136 |
| Serine/threonine-protein phosphatase 2A catalytic subunit alpha isoform           | 0.6403 | 0.6158 | 0.4686 | 0.6153 |
| Serine/threonine-protein phosphatase 6 regulatory subunit 3                       | 0.0273 | 0.4408 | 0.9862 | 0.4058 |
| Serine/threonine-protein phosphatase PP1-beta catalytic subunit                   | 0.9632 | 0.9937 | 0.1527 | 0.0373 |
| Serpin B9                                                                         | 0.2217 | 0.6176 | 0.4536 | 0.1614 |
| Serpin H1                                                                         | 0.9780 | 0.9880 | 0.0831 | 0.0386 |
| Serrate RNA effector molecule homolog                                             | 0.2640 | 0.8705 | 0.8084 | 0.3602 |
| Serum deprivation-response protein                                                | 0.8749 | 0.6001 | 0.0393 | 0.4004 |
| Serum paraoxonase/arylesterase 2                                                  | 0.0176 | 0.1427 | 0.9949 | 0.8107 |
| Seryl-tRNA synthetase cytoplasmic                                                 | 0.7876 | 0.8419 | 0.4989 | 0.4789 |
| S-formylglutathione hydrolase                                                     | 0.0792 | 0.4086 | 0.9804 | 0.8909 |
| SH3 domain-binding glutamic acid-rich-like protein 3                              | 0.7683 | 0.9012 | 0.3216 | 0.3404 |
| SH3 domain-containing protein 19                                                  | 0.2006 | 0.1065 | 0.9186 | 0.9746 |
| Sialic acid synthase                                                              | 0.9623 | 0.8463 | 0.0480 | 0.2490 |
| Sideroflexin-1                                                                    | 0.7941 | 0.7654 | 0.3698 | 0.5783 |
| Signal recognition particle 14 kDa protein                                        | 0.4509 | 0.3328 | 0.7460 | 0.8706 |
| Signal recognition particle 68 kDa protein                                        | 0.8055 | 0.6248 | 0.4499 | 0.5438 |
| Signal recognition particle 9 kDa protein                                         | 0.7455 | 0.6838 | 0.2645 | 0.6323 |
| Signal recognition particle receptor subunit alpha                                | 0.3891 | 0.5079 | 0.6055 | 0.7634 |
| Signal transducer and activator of transcription 1-alpha/beta                     | 0.1168 | 0.0585 | 0.7828 | 0.9445 |
| Signal transducer and activator of transcription 3                                | 0.9321 | 0.8616 | 0.1938 | 0.4429 |
| Single-stranded DNA-binding protein mitochondrial                                 | 0.9438 | 0.8611 | 0.0552 | 0.2294 |
| Small glutamine-rich tetratricopeptide repeat-containing protein alpha            | 0.7153 | 0.8302 | 0.3773 | 0.4035 |
| Small nuclear ribonucleoprotein G                                                 | 0.6368 | 0.7319 | 0.5489 | 0.5042 |
| Small nuclear ribonucleoprotein Sm D1                                             | 0.8986 | 0.9505 | 0.2045 | 0.1523 |
| Small nuclear ribonucleoprotein Sm D2                                             | 0.7612 | 0.8885 | 0.4782 | 0.3487 |
| Small nuclear ribonucleoprotein Sm D3                                             | 0.8373 | 0.8295 | 0.3412 | 0.2855 |
| Small ubiquitin-related modifier 2                                                | 0.4517 | 0.9389 | 0.8196 | 0.2325 |
| Small ubiquitin-related modifier 3                                                | 0.4275 | 0.9185 | 0.8356 | 0.2858 |
| Sodium/potassium-transporting ATPase subunit alpha-1                              | 0.8596 | 0.8161 | 0.3167 | 0.3333 |
| Sorcin                                                                            | 0.7371 | 0.6296 | 0.2841 | 0.6026 |
| Sorting nexin-1                                                                   | 0.2653 | 0.6635 | 0.9222 | 0.6398 |
| Sorting nexin-12                                                                  | 0.4176 | 0.4631 | 0.6377 | 0.8653 |
| Sorting nexin-3                                                                   | 0.6338 | 0.5080 | 0.6374 | 0.7707 |
| Sorting nexin-6                                                                   | 0.5817 | 0.6953 | 0.7161 | 0.5967 |
| SPARC                                                                             | 0.0223 | 0.0234 | 0.8920 | 0.9978 |
| Spectrin alpha chain brain                                                        | 0.3252 | 0.3791 | 0.8936 | 0.9072 |
| Spectrin beta chain brain 1                                                       | 0.3827 | 0.3982 | 0.8586 | 0.8926 |
| Spermidine synthase                                                               | 0.9631 | 0.9630 | 0.1450 | 0.1609 |

|                                                                |        |        |        |        |
|----------------------------------------------------------------|--------|--------|--------|--------|
| Spliceosome RNA helicase DDX39B                                | 0.6262 | 0.7870 | 0.5461 | 0.2848 |
| Splicing factor proline- and glutamine-rich                    | 0.7829 | 0.1258 | 0.3030 | 0.5297 |
| Splicing factor 3B subunit 1                                   | 0.9764 | 0.9983 | 0.0312 | 0.0220 |
| Splicing factor 3B subunit 2                                   | 0.6889 | 0.5275 | 0.5603 | 0.4698 |
| Splicing factor 3B subunit 3                                   | 0.5727 | 0.9490 | 0.4421 | 0.0303 |
| SRA stem-loop-interacting RNA-binding protein mitochondrial    | 0.9965 | 0.9999 | 0.0143 | 0.0009 |
| Stabilin-1                                                     | 0.7410 | 0.5204 | 0.4674 | 0.8358 |
| Staphylococcal nuclease domain-containing protein 1            | 0.6704 | 0.5473 | 0.6217 | 0.7483 |
| Stathmin                                                       | 0.0735 | 0.5420 | 0.9696 | 0.5852 |
| STE20-like serine/threonine-protein kinase                     | 0.8551 | 0.9832 | 0.3850 | 0.1262 |
| Stomatin-like protein 2                                        | 0.6529 | 0.5214 | 0.1117 | 0.4356 |
| Stress-70 protein mitochondrial                                | 0.9084 | 0.9714 | 0.1767 | 0.1010 |
| Stress-induced-phosphoprotein 1                                | 0.5253 | 0.9243 | 0.6517 | 0.2045 |
| Structural maintenance of chromosomes protein 1A               | 0.6853 | 0.7779 | 0.6007 | 0.5236 |
| Succinyl-CoA ligase [GDP-forming] subunit alpha mitochondrial  | 0.5025 | 0.7514 | 0.7545 | 0.5606 |
| Succinyl-CoA:3-ketoacid-coenzyme A transferase 1 mitochondrial | 0.4653 | 0.5113 | 0.6776 | 0.7219 |
| Sulfatase-modifying factor 2                                   | 0.0231 | 0.0070 | 0.9955 | 0.9984 |
| Sulfide:quinone oxidoreductase mitochondrial                   | 0.6057 | 0.1086 | 0.0135 | 0.1733 |
| Sulfotransferase 1A3/1A4                                       | 0.9797 | 0.9990 | 0.0194 | 0.0050 |
| Sulfotransferase family cytosolic 1B member 1                  | 0.9779 | 0.0810 | 0.0998 | 0.6296 |
| SUMO-activating enzyme subunit 2                               | 0.0327 | 0.0007 | 0.9587 | 1.0000 |
| SUN domain-containing protein 2                                | 0.4216 | 0.3388 | 0.4721 | 0.8344 |
| Superoxide dismutase [Cu-Zn]                                   | 0.5619 | 0.8408 | 0.7318 | 0.3366 |
| Superoxide dismutase [Mn] mitochondrial                        | 0.4419 | 0.5824 | 0.7011 | 0.4186 |
| SWI/SNF complex subunit SMARCC1                                | 0.5279 | 0.3103 | 0.4426 | 0.8836 |
| SWI/SNF complex subunit SMARCC2                                | 0.5816 | 0.5044 | 0.5473 | 0.5476 |
| Switch-associated protein 70                                   | 0.8114 | 0.4235 | 0.3585 | 0.8637 |
| Synaptic vesicle membrane protein VAT-1 homolog                | 0.4177 | 0.6645 | 0.7848 | 0.6795 |
| Synaptojanin-2-binding protein                                 | 0.9836 | 0.8490 | 0.0880 | 0.4282 |
| Synaptosomal-associated protein 23                             | 0.9553 | 0.4529 | 0.0326 | 0.4998 |
| Syntaxin-12                                                    | 0.6159 | 0.8041 | 0.5002 | 0.4154 |
| Syntaxin-4                                                     | 0.7024 | 0.8453 | 0.4985 | 0.4702 |
| Talin-1                                                        | 0.5495 | 0.6445 | 0.7495 | 0.7165 |
| Talin-2                                                        | 0.2115 | 0.3578 | 0.9116 | 0.8988 |
| T-complex protein 1 subunit alpha                              | 0.7151 | 0.9694 | 0.4707 | 0.1307 |
| T-complex protein 1 subunit beta                               | 0.7046 | 0.8520 | 0.5365 | 0.3876 |
| T-complex protein 1 subunit delta                              | 0.6438 | 0.9211 | 0.5919 | 0.3268 |
| T-complex protein 1 subunit epsilon                            | 0.6340 | 0.8164 | 0.6651 | 0.4104 |
| T-complex protein 1 subunit eta                                | 0.5294 | 0.8909 | 0.6886 | 0.2816 |
| T-complex protein 1 subunit gamma                              | 0.5841 | 0.8346 | 0.6953 | 0.3643 |
| T-complex protein 1 subunit theta                              | 0.5818 | 0.8270 | 0.6634 | 0.3338 |
| T-complex protein 1 subunit zeta                               | 0.5064 | 0.8194 | 0.7101 | 0.4250 |
| Thioredoxin                                                    | 0.4181 | 0.9361 | 0.7852 | 0.2663 |
| Thioredoxin domain-containing protein 12                       | 0.4463 | 0.8376 | 0.6797 | 0.3184 |
| Thioredoxin domain-containing protein 17                       | 0.9941 | 0.9537 | 0.0107 | 0.0595 |
| Thioredoxin domain-containing protein 5                        | 0.0551 | 0.0023 | 0.9908 | 0.9995 |
| Thioredoxin reductase 1 cytoplasmic                            | 0.2829 | 0.9487 | 0.8795 | 0.1826 |
| Thioredoxin-dependent peroxide reductase mitochondrial         | 0.9798 | 0.9150 | 0.0890 | 0.2951 |
| Thioredoxin-like protein 1                                     | 0.3063 | 0.0869 | 0.8316 | 0.9911 |
| Threonyl-tRNA synthetase cytoplasmic                           | 0.5483 | 0.9139 | 0.5140 | 0.0342 |
| Thrombospondin-1                                               | 0.0033 | 0.0051 | 0.9981 | 0.9932 |
| Thymidylate kinase                                             | 0.4954 | 0.5047 | 0.7872 | 0.7270 |
| Thymosin beta-10                                               | 0.0358 | 0.7043 | 0.6688 | 0.3180 |
| Thymosin beta-4-like protein 3                                 | 0.0346 | 0.6549 | 0.8531 | 0.5214 |
| Thyroid hormone receptor-associated protein 3                  | 0.6734 | 0.5136 | 0.1250 | 0.8043 |
| Tight junction protein ZO-1                                    | 0.4730 | 0.9477 | 0.7964 | 0.2137 |

|                                                       |        |        |        |        |
|-------------------------------------------------------|--------|--------|--------|--------|
| Tight junction protein ZO-2                           | 0.8324 | 0.9889 | 0.2728 | 0.0870 |
| TLD domain-containing protein KIAA1609                | 0.4758 | 0.0619 | 0.5425 | 0.9421 |
| Torsin-1A-interacting protein 1                       | 0.6028 | 0.1123 | 0.6701 | 0.9791 |
| TRAF2 and NCK-interacting protein kinase              | 0.9986 | 0.8941 | 0.0059 | 0.0380 |
| Trans-2-enoyl-CoA reductase mitochondrial             | 0.7032 | 0.1939 | 0.3225 | 0.9568 |
| Transaldolase                                         | 0.1885 | 0.1541 | 0.9440 | 0.9492 |
| Transcription elongation factor A protein-like 5      | 0.9166 | 0.9506 | 0.0801 | 0.2631 |
| Transcription elongation factor B polypeptide 1       | 0.3625 | 0.4152 | 0.8684 | 0.8560 |
| Transcription factor BTF3                             | 0.3072 | 0.7961 | 0.8504 | 0.4649 |
| Transcription intermediary factor 1-beta              | 0.4987 | 0.5429 | 0.4004 | 0.6035 |
| Transforming protein RhoA                             | 0.7490 | 0.8550 | 0.4869 | 0.4887 |
| Transgelin                                            | 0.0033 | 0.0002 | 0.6006 | 0.5557 |
| Transgelin-2                                          | 0.2595 | 0.5071 | 0.7072 | 0.5829 |
| Transitional endoplasmic reticulum ATPase             | 0.7182 | 0.6590 | 0.5780 | 0.7234 |
| Transketolase                                         | 0.2180 | 0.7389 | 0.9242 | 0.4145 |
| Translational activator GCN1                          | 0.2088 | 0.2943 | 0.9430 | 0.8964 |
| Translationally-controlled tumor protein              | 0.6546 | 0.7285 | 0.5488 | 0.5779 |
| Translin-associated protein X                         | 0.5063 | 0.5813 | 0.7332 | 0.6642 |
| Translocator protein                                  | 0.9703 | 0.9021 | 0.0739 | 0.2281 |
| Translocon-associated protein subunit alpha           | 0.9472 | 0.8480 | 0.0557 | 0.4021 |
| Transmembrane emp24 domain-containing protein 10      | 0.5860 | 0.6628 | 0.6460 | 0.6655 |
| Transmembrane emp24 domain-containing protein 9       | 0.4191 | 0.3249 | 0.6293 | 0.9042 |
| Transmembrane protein 109                             | 0.7268 | 0.9560 | 0.3749 | 0.2351 |
| Transmembrane protein 43                              | 0.5692 | 0.6054 | 0.7203 | 0.6762 |
| Transportin-1                                         | 0.6302 | 0.9410 | 0.4739 | 0.2053 |
| Trifunctional enzyme subunit alpha mitochondrial      | 0.8425 | 0.8138 | 0.3810 | 0.5169 |
| Trifunctional enzyme subunit beta mitochondrial       | 0.6975 | 0.0828 | 0.3873 | 0.9529 |
| Trifunctional purine biosynthetic protein adenosine-3 | 0.1186 | 0.8486 | 0.8097 | 0.0556 |
| TRIO and F-actin-binding protein                      | 0.6658 | 0.6556 | 0.3570 | 0.5365 |
| Triosephosphate isomerase                             | 0.4411 | 0.7306 | 0.7431 | 0.4891 |
| Tripeptidyl-peptidase 1                               | 0.5349 | 0.7544 | 0.2495 | 0.2151 |
| Tripeptidyl-peptidase 2                               | 0.5231 | 0.8144 | 0.6551 | 0.4533 |
| tRNA-splicing ligase RtcB homolog                     | 0.7074 | 0.5635 | 0.5838 | 0.7364 |
| Tropomodulin-3                                        | 0.9805 | 0.9889 | 0.0860 | 0.0794 |
| Tropomyosin alpha-1 chain                             | 0.1248 | 0.2864 | 0.9687 | 0.9241 |
| Tropomyosin alpha-3 chain                             | 0.5905 | 0.9180 | 0.7031 | 0.3401 |
| Tropomyosin alpha-4 chain                             | 0.4406 | 0.7589 | 0.7844 | 0.5580 |
| Tryptophanyl-tRNA synthetase cytoplasmic              | 0.8482 | 0.9316 | 0.1856 | 0.2365 |
| Tubulin alpha-1C chain                                | 0.1735 | 0.6937 | 0.9532 | 0.6770 |
| Tubulin alpha-8 chain                                 | 0.1380 | 0.5222 | 0.9609 | 0.8117 |
| Tubulin beta chain                                    | 0.3138 | 0.8206 | 0.8233 | 0.5417 |
| Tubulin beta-2A chain                                 | 0.3508 | 0.8551 | 0.7844 | 0.4898 |
| Tubulin beta-2C chain                                 | 0.3558 | 0.8402 | 0.7800 | 0.5114 |
| Tubulin beta-3 chain                                  | 0.2750 | 0.8387 | 0.8537 | 0.5185 |
| Tubulin beta-6 chain                                  | 0.4250 | 0.9056 | 0.7234 | 0.3826 |
| Tubulin-folding cofactor B                            | 0.4463 | 0.5780 | 0.5716 | 0.7261 |
| Tubulin-specific chaperone A                          | 0.5470 | 0.7414 | 0.7486 | 0.5825 |
| Tumor protein D54                                     | 0.7781 | 0.7535 | 0.3647 | 0.3816 |
| Tyrosine-protein phosphatase non-receptor type 1      | 0.9478 | 0.9863 | 0.0803 | 0.0738 |
| Tyrosine-protein phosphatase non-receptor type 23     | 0.8920 | 0.7395 | 0.1918 | 0.4844 |
| Tyrosyl-tRNA synthetase cytoplasmic                   | 0.4059 | 0.9846 | 0.5310 | 0.0455 |
| U1 small nuclear ribonucleoprotein 70 kDa             | 0.9890 | 0.5009 | 0.0469 | 0.7795 |
| U2 small nuclear ribonucleoprotein A'                 | 0.0050 | 0.1738 | 0.9992 | 0.9196 |
| U6 snRNA-associated Sm-like protein LSM1              | 0.7648 | 0.9116 | 0.1149 | 0.1970 |
| U6 snRNA-associated Sm-like protein LSM3              | 0.9716 | 0.9907 | 0.1060 | 0.0804 |
| U8 snoRNA-decapping enzyme                            | 0.7286 | 0.1235 | 0.5031 | 0.9595 |

|                                                                                 |        |        |        |        |
|---------------------------------------------------------------------------------|--------|--------|--------|--------|
| Ubiquinone biosynthesis protein COQ9 mitochondrial                              | 0.0024 | 0.0074 | 0.9734 | 0.1535 |
| Ubiquitin carboxyl-terminal hydrolase 14                                        | 0.1382 | 0.4957 | 0.9266 | 0.7990 |
| Ubiquitin carboxyl-terminal hydrolase 5                                         | 0.6917 | 0.7355 | 0.3571 | 0.5733 |
| Ubiquitin carboxyl-terminal hydrolase isozyyme L1                               | 0.2246 | 0.2825 | 0.0664 | 0.0111 |
| Ubiquitin thioesterase OTUB1                                                    | 0.2535 | 0.2283 | 0.8622 | 0.9465 |
| Ubiquitin-40S ribosomal protein S27a                                            | 0.5835 | 0.8579 | 0.6493 | 0.0635 |
| Ubiquitin-associated protein 2-like                                             | 0.0016 | 0.0019 | 0.9999 | 0.9998 |
| Ubiquitin-conjugating enzyme E2 L3                                              | 0.5009 | 0.9160 | 0.7570 | 0.1127 |
| Ubiquitin-conjugating enzyme E2 N                                               | 0.7780 | 0.9593 | 0.4785 | 0.1865 |
| Ubiquitin-conjugating enzyme E2 variant 1                                       | 0.8677 | 0.8690 | 0.2722 | 0.4100 |
| Ubiquitin-like modifier-activating enzyme 1                                     | 0.6409 | 0.7988 | 0.5951 | 0.4797 |
| Ubiquitin-like-conjugating enzyme ATG3                                          | 0.1844 | 0.5424 | 0.9294 | 0.8001 |
| UBX domain-containing protein 6                                                 | 0.2885 | 0.7927 | 0.8593 | 0.4697 |
| UDP-glucose 6-dehydrogenase                                                     | 0.4520 | 0.2424 | 0.6332 | 0.9274 |
| UDP-glucose:glycoprotein glucosyltransferase 1                                  | 0.2279 | 0.4857 | 0.9196 | 0.6300 |
| UDP-N-acetylglucosamine-peptide N-acetylglucosaminyltransferase 110 kDa subunit | 0.1488 | 0.2221 | 0.9310 | 0.7641 |
| UDP-N-acetylhexosamine pyrophosphorylase                                        | 0.8992 | 0.0260 | 0.3144 | 0.7819 |
| UMP-CMP kinase                                                                  | 0.1164 | 0.0054 | 0.9689 | 0.9997 |
| Uncharacterized glycosyltransferase AER61                                       | 0.0016 | 0.0009 | 0.9995 | 0.9999 |
| Uncharacterized protein C1orf167                                                | 0.4863 | 0.0018 | 0.7146 | 0.9999 |
| UPF0317 protein C14orf159 mitochondrial                                         | 0.6351 | 0.0883 | 0.6641 | 0.9723 |
| UPF0366 protein C11orf67                                                        | 0.9790 | 0.3581 | 0.0668 | 0.5718 |
| UPF0568 protein C14orf166                                                       | 0.6375 | 0.7681 | 0.3410 | 0.5308 |
| UPF0585 protein C16orf13                                                        | 0.4067 | 0.3938 | 0.8047 | 0.8752 |
| UPF0765 protein C10orf58                                                        | 0.9223 | 0.4882 | 0.2238 | 0.2469 |
| Uridine 5'-monophosphate synthase                                               | 0.8966 | 0.9191 | 0.2370 | 0.3286 |
| Uroporphyrinogen decarboxylase                                                  | 0.4842 | 0.6810 | 0.7517 | 0.6665 |
| Utrophin                                                                        | 0.7473 | 0.8246 | 0.5171 | 0.4451 |
| UV excision repair protein RAD23 homolog B                                      | 0.0831 | 0.7543 | 0.9826 | 0.3602 |
| Uveal autoantigen with coiled-coil domains and ankyrin repeats                  | 0.9521 | 0.8054 | 0.1655 | 0.3128 |
| Vacuolar protein sorting-associated protein 29                                  | 0.4420 | 0.9716 | 0.7556 | 0.1362 |
| Vacuolar protein sorting-associated protein 33A                                 | 0.3311 | 0.4526 | 0.8031 | 0.8335 |
| Vacuolar protein sorting-associated protein 35                                  | 0.4974 | 0.5476 | 0.4207 | 0.6991 |
| Vacuolar protein sorting-associated protein 45                                  | 0.0145 | 0.0054 | 0.9970 | 0.9997 |
| Vacuolar protein sorting-associated protein 4A                                  | 0.5442 | 0.5505 | 0.7204 | 0.7669 |
| Vacuolar protein sorting-associated protein 4B                                  | 0.2753 | 0.2906 | 0.9160 | 0.9014 |
| Vacuolar protein-sorting-associated protein 25                                  | 0.2863 | 0.6337 | 0.9106 | 0.5463 |
| Valyl-tRNA synthetase                                                           | 0.6777 | 0.8022 | 0.4139 | 0.5214 |
| Vasodilator-stimulated phosphoprotein                                           | 0.1614 | 0.8257 | 0.9572 | 0.4974 |
| Very long-chain specific acyl-CoA dehydrogenase mitochondrial                   | 0.6805 | 0.2737 | 0.4563 | 0.9480 |
| Vesicle-associated membrane protein-associated protein A                        | 0.4013 | 0.7542 | 0.7230 | 0.4924 |
| Vesicle-trafficking protein SEC22b                                              | 0.5657 | 0.0713 | 0.4727 | 0.9831 |
| Vesicular integral-membrane protein VIP36                                       | 0.8285 | 0.9580 | 0.1451 | 0.1150 |
| Vigilin                                                                         | 0.7790 | 0.4475 | 0.5044 | 0.8505 |
| Vimentin                                                                        | 0.8453 | 0.1640 | 0.2154 | 0.3578 |
| Vinculin                                                                        | 0.5259 | 0.6725 | 0.6723 | 0.6506 |
| Voltage-dependent anion-selective channel protein 1                             | 0.2789 | 0.7245 | 0.9076 | 0.6468 |
| Voltage-dependent anion-selective channel protein 2                             | 0.8247 | 0.8432 | 0.4411 | 0.4333 |
| von Willebrand factor                                                           | 0.0211 | 0.4564 | 0.3196 | 0.2415 |
| V-type proton ATPase catalytic subunit A                                        | 0.7270 | 0.5851 | 0.2987 | 0.7427 |
| V-type proton ATPase subunit B brain isoform                                    | 0.3476 | 0.0868 | 0.1437 | 0.9834 |
| V-type proton ATPase subunit G 1                                                | 0.8445 | 0.5976 | 0.0915 | 0.6306 |
| WD repeat-containing protein 1                                                  | 0.4032 | 0.6363 | 0.8277 | 0.7492 |
| WD40 repeat-containing protein SMU1                                             | 0.4002 | 0.1388 | 0.7875 | 0.6048 |
| Xaa-Pro aminopeptidase 1                                                        | 0.1797 | 0.2232 | 0.9517 | 0.9208 |
| X-ray repair cross-complementing protein 5                                      | 0.0002 | 0.0000 | 1.0000 | 1.0000 |

|                                               |        |        |        |        |
|-----------------------------------------------|--------|--------|--------|--------|
| X-ray repair cross-complementing protein 6    | 0.4484 | 0.6645 | 0.6354 | 0.2454 |
| Zinc finger CCCH domain-containing protein 15 | 0.1426 | 0.1741 | 0.9546 | 0.7324 |
| Zinc finger protein 185                       | 0.8918 | 0.8028 | 0.0037 | 0.0230 |
| Zinc finger protein ZPR1                      | 0.4938 | 0.5414 | 0.6965 | 0.7714 |
| Zyxin                                         | 0.0409 | 0.0493 | 0.9873 | 0.9067 |

---

**Suppl. Table 5. Comparison between the proteomic and the miRNA microarray**

| Protein                                                       | Accession | iTRAQ | miRNAs                          | Refseq       | mirarray |
|---------------------------------------------------------------|-----------|-------|---------------------------------|--------------|----------|
| <b>MirTarget2</b>                                             |           |       |                                 |              |          |
| cysteine-rich, angiogenic inducer, 61                         | O00622    | down  | hsa-miR-4330                    | NM_001554    | up       |
| ATP-binding cassette, sub-family A (ABC1), member 1           | O95477    | down  | hsa-miR-4330                    | NM_005502    | up       |
| heat shock 60kDa protein 1 (chaperonin)                       | P10809    | down  | hsa-miR-3194-5p                 | NM_002156    | up       |
| <b>PicTar</b>                                                 |           |       |                                 |              |          |
| SEC22B SEC22 vesicle trafficking protein homolog B            | O75396    | down  | hsa-miR-4296                    | NM_004892    | up       |
| ATP-binding cassette, sub-family A (ABC1), member 1           | O95477    | down  | hsa-miR-4330                    | NM_005502    | up       |
| ASPH aspartate beta-hydroxylase                               | Q12797    | down  | hsa-miR-670                     | NM_001164756 | up       |
| <b>miRanda</b>                                                |           |       |                                 |              |          |
| Dab, mitogen-responsive phosphoprotein, homolog 2             | P98082    | down  | hsa-miR-15a                     | NM_001343    | up       |
| heterogeneous nuclear ribonucleoprotein L                     | P14866    | down  | hsa-miR-15a                     | NM_001533    | up       |
| reticulon 4                                                   | Q9NQC3    | down  | hsa-miR-15a                     | NM_020532    | up       |
| syntrophin, beta 2                                            | Q13425    | down  | hsa-miR-15a                     | NM_006750    | up       |
| EH-domain containing 4                                        | Q9H223    | up    | hsa-miR-124                     | NM_139265    | down     |
| SH3-domain GRB2-like 1                                        | Q99961    | up    | hsa-miR-33a                     | NM_003025    | down     |
| polypyrimidine tract binding protein 1                        | P26599    | up    | hsa-miR-124                     | NM_002819    | down     |
| threonyl-tRNA synthetase                                      | P26639    | up    | hsa-miR-33a                     | NM_152295    | down     |
| karyopherin alpha 3 (importin alpha 2)                        | O00505    | up    | hsa-miR-33a                     | NM_002267    | down     |
| karyopherin alpha 3 (importin alpha 4)                        | O00505    | up    | hsa-miR-124                     | NM_002267    | down     |
| nuclear casein kinase and cyclin-dependent kinase substrate 1 | Q9H1E3    | up    | hsa-miR-33a                     | NM_022731    | down     |
| lactate dehydrogenase B                                       | P07195    | up    | hsa-miR-375                     | NM_002300    | down     |
| ATP-binding cassette, sub-family E (OABP), member 1           | P61221    | up    | hsa-miR-33a                     | NM_002940    | down     |
| EH-domain containing 3                                        | Q9NZN3    | up    | hsa-miR-33a                     | NM_014600    | down     |
| proliferating cell nuclear antigen                            | P12004    | up    | hsa-miR-33a                     | NM_182649    | down     |
| t-complex 1                                                   | P17987    | up    | hsa-miR-33a                     | NM_030752    | down     |
| Ran GTPase activating protein 1                               | P46060    | up    | hsa-miR-196b                    | NM_002883    | down     |
| peroxiredoxin 6                                               | P30041    | up    | hsa-miR-124                     | NM_004905    | down     |
| peroxiredoxin 6                                               | P30041    | up    | hsa-miR-375                     | NM_004905    | down     |
| <b>TargetScan</b>                                             |           |       |                                 |              |          |
| EH-domain containing 4                                        | Q9H223    | up    | miR-34ac/34bc-5p/449abc/449c-5p | NM_139265    | down     |
| polypyrimidine tract binding protein 1                        | P26599    | up    | miR-124/124ab/506               | NM_002819    | down     |
| karyopherin alpha 3 (importin alpha 4)                        | O00505    | up    | miR-124/124ab/506               | NM_002267    | down     |

|                                                              |        |      |                                         |              |      |
|--------------------------------------------------------------|--------|------|-----------------------------------------|--------------|------|
| <b>lactate dehydrogenase B</b>                               | P07195 | up   | miR-375                                 | NM_001174097 | down |
| <b>nuclear autoantigenic sperm protein (histone-binding)</b> | P49321 | up   | miR-124/124ab/506                       | NM_152298    | down |
| <b>ubiquitin-conjugating enzyme E2L 3p</b>                   | P68036 | up   | miR-34ac/34bc-5p/449abc/449c-5p         | NM_003347    | down |
| <b>EH-domain containing 3</b>                                | Q9NZN3 | up   | miR-124/124ab/506                       | NM_014600    | down |
| <b>peroxiredoxin 6</b>                                       | P30041 | up   | miR-124/124ab/506                       | NM_004905    | down |
| <b>LIM and senescent cell antigen-like domains 1</b>         | P48059 | down | miR-15abc/16/16abc/195/322/424/497/1907 | NM_001193482 | up   |
| <b>A kinase (PRKA) anchor protein 13</b>                     | Q12802 | down | miR-125a-5p/125b-5p/351/670/4319        | NM_006738    | up   |
| <b>A kinase (PRKA) anchor protein 13</b>                     | Q12802 | down | miR-15abc/16/16abc/195/322/424/497/1907 | NM_006738    | up   |
| <b>mitogen-activated protein kinase 14</b>                   | Q16539 | down | miR-125a-5p/125b-5p/351/670/4319        | NM_001315    | up   |
| <b>reticulon 4</b>                                           | Q9NQC3 | down | miR-15abc/16/16abc/195/322/424/497/1907 | NM_007008    | up   |
| <b>syntrophin, beta 2</b>                                    | Q13425 | down | miR-15abc/16/16abc/195/322/424/497/1907 | NM_006750    | up   |
| <b>ASPH aspartate beta-hydroxylase</b>                       | Q12797 | down | miR-15abc/16/16abc/195/322/424/497/1907 | NM_001164751 | up   |

---



**Suppl. Table 6. Demographics of the IPAH patients and controls used for PAEC isolation**

| <b>Subject ID</b> | <b>Age</b> | <b>Sex</b> | <b>Ethnicity</b> | <b>mPAP</b> |
|-------------------|------------|------------|------------------|-------------|
| PAEC-C1           | 51         | F          | Caucasian        |             |
| PAEC-C2           | 50         | F          | Caucasian        |             |
| PAEC-C3           | 51         | M          | Caucasian        |             |
| PAEC-C4           | 36         | F          | Caucasian        |             |
| PAEC-IPAH1        | 32         | F          | Caucasian        | 70          |
| PAEC-IPAH2        | 53         | F          | Caucasian        | 53          |
| PAEC-IPAH3        | 27         | M          | Caucasian        | 68          |
| PAEC-IPAH4        | 40         | M          | Caucasian        | 73          |
| PAEC-IPAH5        | 32         | F          | Caucasian        | 49          |
| PAEC-IPAH6        | 16         | F          | Caucasian        | 95          |
